# Supplementary material for: Overexpression of miR-10a-5p facilitates the progression of osteoarthritis
Source: publisher site journal article supplement (doi:10.18632/aging.102989), 2020-04-13
Supplement: Supplementary file [file aging-v12i7-102989-supplementary-material-SD1.pdf]

**SUPPLEMENTARY TABLES**

**Supplementary Table 1. Sequences of RT-qPCR primers used.**

| <b>Gene Name</b>    | <b>Forward (5'-3')</b>       | <b>Reverse (5'-3')</b>       |
|---------------------|------------------------------|------------------------------|
| GAPDH               | CCTGCACCACCAACTGCTTA         | GGCCATCCACAGTCTTCTGAG        |
| U6                  | CTCGCTTCGGCAGCACAA           | AACGCTTCACGAATTTGCGT         |
| OTUD6B-AS           | GACATATCCGGGTGACGTTTT        | TTGTTCCACTGTCTTCTGGCATT      |
| has_circ_0010029    | AGCTGCTGCTGACTTGAGTG         | TTGCTAGTTCTGGAGGCACC         |
| ADM2                | TACACGCAGTGCTGGTACG          | CTGCTCGTCCAGACATGGC          |
| CAPN6               | CAGCAGACTTTTCTGTGATCCA       | GGGGACGTTTCCACACCAC          |
| CPXM2               | GTGCGCGGGAAGAAATGAC          | CCTCCCTTGAGTGATGACACC        |
| HCAR1               | AATTTGGCCGTGGCTGATTTT        | CCGTAAGGAACACGATGCTCC        |
| NDUFA4L2            | CCTGAGCCCCAATGACCAATA        | TCTGGCCGGTCTTCTTCA           |
| SORCS2              | GTCACCACCGTCATCGACAAT        | TTCGTCTGCGCTGAGGAATAG        |
| CA9                 | GGATCTACCTACTGTTGAGGCT       | CATAGCGCCAATGACTCTGGT        |
| MKX                 | CGAACACTACCATGATGGGAAA       | TTCTGATGACGATGGAGACACTA      |
| NLGN4X              | GGTTTACCGCCAATTTGGATACT      | CCGTGGGCACGTAGATGTT          |
| SULT1B1             | TTTATCTGGCTCGTAATGCCAAG      | CCATAGGCCACTTTTCCAGTT        |
| HOXA3               | GCAAAAAGCGACCTACTACGA        | CGTCGGCGCCCAAAG              |
| COL2A1              | TGAGCCATGATTTCGCTCG          | CCCTTTGGTCTCTGGTTGCC         |
| SOX9                | CTGGGAACAACCCGTCTACA         | TTCTGGTTGGTCTCTCTTTCTT       |
| MMP13               | CACCTTATGCTTCTGATGACG        | TCCTCGGAGACTGGTAATGG         |
| <b>si-HOXA3</b>     |                              |                              |
| <b>HOXA3-homo-1</b> | <b>CCAACGGGUUCGCUUAUAATT</b> | <b>UUAUAAGCGAACCCGUUGGTT</b> |
| <b>HOXA3-homo-2</b> | <b>GUGGCUAUCUGAACUCUAUTT</b> | <b>AUAGAGUUCAGAUAGCCACTT</b> |
| <b>HOXA3-homo-3</b> | <b>CCAGCCCUCUUUGGUCUAATT</b> | <b>UUAGACCAAAGAGGGCUGGTT</b> |

Please browse Full Text version to see the data of Supplementary Tables 2 and 3.

**Supplementary Table 2. Detailed differentially expressed mRNAs between miR-10a-5p overexpression group(exp) and control group(ctrl).**

**Supplementary Table 3. Detailed differentially expressed lncRNAs between miR-10a-5p overexpression group(exp) and control group(ctrl).**

**Supplementary Table 4. Detailed differentially expressed miRNAs between miR-10a-5p overexpression group(exp) and control group(ctrl).**

| <b>miRNA</b>    | <b>Chr_Start_End_Strand</b> | <b>miRBaseID</b> | <b>logFC</b> | <b>foldChange</b> | <b>PValue</b> | <b>pAdj</b> | <b>diffState</b> | <b>M3</b> | <b>M4</b> | <b>NC-3</b> | <b>NC-4</b> |
|-----------------|-----------------------------|------------------|--------------|-------------------|---------------|-------------|------------------|-----------|-----------|-------------|-------------|
| hsa-miR-10a-5p  | chr17_48579904_48579926_-   | MIMAT0000253     | 13.23001     | 9607.938          | 1.2E-106      | 4.3E-104    | up               | 404.4072  | 475.7128  | 0           | 0.06014     |
| hsa-miR-100-5p  | chr11_122152275_122152296_- | MIMAT0000098     | 1.00197      | 0.499319          | 1.19E-05      | 0.001587    | down             | 1604.797  | 1714.644  | 2999.09     | 3574.008    |
| hsa-miR-193b-3p | chr16_14304017_14304038_+   | MIMAT0002819     | 1.09184      | 0.469164          | 1.32E-05      | 0.001587    | down             | 361.7629  | 296.0147  | 452.3804    | 933.9764    |
| hsa-miR-3619-3p | chr22_46091090_46091111_+   | MIMAT0019219     | 8.58005      | 0.002613          | 0.000192      | 0.013839    | down             | 0         | 0         | 4.471834    | 7.096537    |
| hsa-miR-496     | chr14_101060628_101060649_+ | MIMAT0002818     | 8.80211      | 0.00224           | 0.00012       | 0.010782    | down             | 0         | 0         | 5.438717    | 8.058779    |

**Supplementary Table 5. Detailed differentially expressed circRNAs between miR-10a-5p overexpression group(exp) and control group(ctrl).**

| Chr_Start_E<br>nd_Strand           | circBankI<br>D                | circbas<br>eID           | spliced<br>SeqLen<br>gth | Gene              | mouse_cons<br>erved_circR<br>NA | startE<br>ndReg<br>ion | log<br>FC        | fold<br>Cha<br>nge | PV<br>alu<br>e   | pA<br>dj         | diff<br>Sta<br>te | M1               | M2               | NC<br>-3         | NC<br>-4         |
|------------------------------------|-------------------------------|--------------------------|--------------------------|-------------------|---------------------------------|------------------------|------------------|--------------------|------------------|------------------|-------------------|------------------|------------------|------------------|------------------|
| chr17_81042813_81043199_+          |                               |                          |                          | MET<br>RNL        |                                 | exon-<br>exon          | 6.4<br>620<br>89 | 88.1<br>6225       | 2.8<br>8E-<br>05 | 0.0<br>037<br>01 | up                | 1.0<br>425<br>8  | 0.2<br>273<br>58 | 0                | 0                |
| chr14_99723<br>807_9972417<br>6_-  | hsa_circBC<br>L11B_002        | hsa_cir<br>c_0033<br>144 | 369                      | BCL1<br>1B        | mmu_circ_0<br>000414            | exon-<br>exon          | 6.0<br>104<br>97 | 64.4<br>6734       | 8.6<br>5E-<br>06 | 0.0<br>016<br>69 | up                | 0.4<br>170<br>32 | 0.5<br>305<br>03 | 0                | 0                |
| chr15_89656<br>955_8965975<br>2_+  | hsa_circAB<br>HD2_007         | hsa_cir<br>c_0007<br>099 | 300                      | ABH<br>D2         | mmu_circ_0<br>014410            | exon-<br>exon          | 6.0<br>028       | 64.1<br>2433       | 7.1<br>2E-<br>05 | 0.0<br>054<br>99 | up                | 0.6<br>950<br>53 | 0.2<br>273<br>58 | 0                | 0                |
| chr13_76195898_76335174_+          |                               |                          |                          | LMO<br>7          |                                 | exon-<br>exon          | 5.3<br>222<br>77 | 40.0<br>0966       | 0.0<br>002<br>88 | 0.0<br>159<br>07 | up                | 0.3<br>475<br>27 | 0.2<br>273<br>58 | 0                | 0                |
| chr7_262328<br>70_26232993<br>_-   | hsa_circHN<br>RNPA2B1_<br>019 | hsa_cir<br>c_0001<br>689 | 123                      | HNR<br>NPA2<br>B1 |                                 | exon-<br>exon          | 5.3<br>222<br>77 | 40.0<br>0966       | 0.0<br>002<br>88 | 0.0<br>159<br>07 | up                | 0.3<br>475<br>27 | 0.2<br>273<br>58 | 0                | 0                |
| chr14_35331<br>249_3533152<br>8_-  | hsa_circBA<br>Z1A_004         | hsa_cir<br>c_0006<br>137 | 279                      | BAZ1<br>A         |                                 | exon-<br>exon          | 4.9<br>202<br>85 | 30.2<br>7982       | 0.0<br>017<br>35 | 0.0<br>768<br>06 | up                | 0.2<br>085<br>16 | 0.2<br>273<br>58 | 0                | 0                |
| chr16_85667<br>519_8566773<br>8_+  | hsa_circKI<br>AA0182_00<br>1  | hsa_cir<br>c_0000<br>722 | 219                      | GSE1              | mmu_circ_0<br>001730            | exon-<br>exon          | 4.1<br>109<br>17 | 17.2<br>7864       | 6.6<br>8E-<br>05 | 0.0<br>054<br>99 | up                | 0.4<br>170<br>32 | 1.5<br>915<br>09 | 0                | 0.0<br>907<br>27 |
| chr1_155646<br>338_1556493<br>03_- | hsa_circYY<br>IAP1_008        | hsa_cir<br>c_0014<br>606 | 459                      | YY1<br>API        |                                 | exon-<br>exon          | 2.4<br>501<br>28 | 5.46<br>4644       | 0.0<br>028<br>27 | 0.0<br>991<br>92 | up                | 0.9<br>730<br>75 | 0.4<br>547<br>17 | 0.1<br>604<br>78 | 0.0<br>907<br>27 |
| chr5_647473<br>01_64769779<br>_-   | hsa_circAD<br>AMTS6_00<br>4   | hsa_cir<br>c_0072<br>688 | 1352                     | ADA<br>MTS6       | mmu_circ_0<br>004419            | exon-<br>exon          | 2.1<br>296<br>8  | 0.22<br>8508       | 0.0<br>019<br>68 | 0.0<br>768<br>06 | do<br>wn          | 0.1<br>390<br>11 | 0.3<br>031<br>45 | 0.8<br>023<br>89 | 1.0<br>887<br>2  |
| chr1_141049<br>12_14109326<br>_+   | hsa_circPR<br>DM2_011         | hsa_cir<br>c_0010<br>029 | 4414                     | PRD<br>M2         |                                 | exon-<br>exon          | 5.2<br>503<br>5  | 0.02<br>6272       | 0.0<br>019<br>9  | 0.0<br>768<br>06 | do<br>wn          | 0                | 0                | 0.1<br>604<br>78 | 0.3<br>629<br>07 |

Please browse Full Text version to see the data of Supplementary Tables 6 to 10.

**Supplementary Table 6. Detailed GO analysis (biological process) of differentially expressed mRNAs.**

**Supplementary Table 7. Detailed GO analysis (cellular component) of differentially expressed mRNAs.**

**Supplementary Table 8. Detailed GO analysis(molecular function) of differentially expressed mRNAs.**

**Supplementary Table 9. Detailed KEGG analysis of differentially expressed mRNAs.**

**Supplementary Table 10. Detailed GO analysis(biological process) of ci-genes of differentially expressed lncRNAs.**

**Supplementary Table 11. Detailed GO analysis (cellular component) of ci-genes of differentially expressed lncRNAs.**

| databaseID | Description                              | type               | geneRatio | bgRatio   | pvalue   | padj     | qvalue   | enrichScore | overlapGeneList                                                                | overlapGeneCount |
|------------|------------------------------------------|--------------------|-----------|-----------|----------|----------|----------|-------------|--------------------------------------------------------------------------------|------------------|
| GO:0030120 | vesicle coat                             | cellular component | 5/267     | 48/18678  | 0.000596 | 0.177015 | 0.177015 | 7.286985    | PEF1/COPZ1/EPN2/SYNRG/SEC24B                                                   | 5                |
| GO:0030117 | membrane coat                            | cellular component | 6/267     | 86/18678  | 0.001459 | 0.177015 | 0.177015 | 4.880585    | PEF1/COPZ1/EPN2/SYNRG/VPS33B/SEC24B                                            | 6                |
| GO:0048475 | coated membrane                          | cellular component | 6/267     | 86/18678  | 0.001459 | 0.177015 | 0.177015 | 4.880585    | PEF1/COPZ1/EPN2/SYNRG/VPS33B/SEC24B                                            | 6                |
| GO:0031463 | Cu3-RING ubiquitin ligase complex        | cellular component | 3/267     | 34/18678  | 0.012465 | 0.640758 | 0.640758 | 6.172505    | ENC1/GAN/PEF1                                                                  | 3                |
| GO:0005667 | transcription factor complex             | cellular component | 9/267     | 270/18678 | 0.015966 | 0.640758 | 0.640758 | 2.331835    | BRF1/BRF2/JUNB/SFPQ/SNF8/HAND2/SIX1/TBX2/NFYC                                  | 9                |
| GO:0030658 | transport vesicle membrane               | cellular component | 7/267     | 188/18678 | 0.018699 | 0.640758 | 0.640758 | 2.60471     | PEF1/RAB1A/SCAMP1/DNM1L/SPRED2/SYNRG/SEC24B                                    | 7                |
| GO:0030118 | clathrin coat DNA                        | cellular component | 3/267     | 41/18678  | 0.020646 | 0.640758 | 0.640758 | 5.118663    | EPN2/SYNRG/VPS33B                                                              | 3                |
| GO:0044815 | packaging complex                        | cellular component | 5/267     | 113/18678 | 0.023175 | 0.640758 | 0.640758 | 3.095356    | HIST2H3D/SMC4/H2BFWT/HIST1H2AI/HIST4H4                                         | 5                |
| GO:0062023 | collagen-containing extracellular matrix | cellular component | 11/267    | 399/18678 | 0.02902  | 0.640758 | 0.640758 | 1.928586    | A1BG/ADAMTS1/COL4A5/COL9A2/FGA/FMOD/SERP1NB6/LOXL1/ADAMTS9/IGFBP7/LTBP3        | 11               |
| GO:0030135 | coated vesicle                           | cellular component | 8/267     | 261/18678 | 0.034503 | 0.640758 | 0.640758 | 2.144216    | EPGN/PEF1/SCAMP1/COPZ1/EPN2/SYNRG/VPS33B/SEC24B                                | 8                |
| GO:0030662 | coated vesicle membrane                  | cellular component | 6/267     | 169/18678 | 0.034792 | 0.640758 | 0.640758 | 2.483611    | EPGN/PEF1/COPZ1/EPN2/SYNRG/SEC24B                                              | 6                |
| GO:0031012 | extracellular matrix                     | cellular component | 12/267    | 468/18678 | 0.037407 | 0.640758 | 0.640758 | 1.793719    | A1BG/ADAMTS1/CHI3L1/COL4A5/COL9A2/FGA/FMOD/SERP1NB6/LOXL1/ADAMTS9/IGFBP7/LTBP3 | 12               |

**Supplementary Table 12. Detailed GO analysis(molecular function) of ci-genes of differentially expressed lncRNAs.**

| databaseID | Description                                                                                                                                                                                       | type               | geneRatio | bgRatio   | pvalue   | padj     | qvalue   | enrichScore | overlapGeneList                                                                                                    | Overlap GeneCount |
|------------|---------------------------------------------------------------------------------------------------------------------------------------------------------------------------------------------------|--------------------|-----------|-----------|----------|----------|----------|-------------|--------------------------------------------------------------------------------------------------------------------|-------------------|
| GO:0016651 | oxidoreductase activity, acting on NAD(P)H                                                                                                                                                        | molecular function | 6/247     | 96/16969  | 0.002787 | 0.375998 | 0.372662 | 4.293775    | AKR1C2/AKR1C3/CBR1/TXNRD2/DHRS4/MIOX                                                                               | 6                 |
| GO:0004033 | aldo-keto reductase (NADP) activity                                                                                                                                                               | molecular function | 3/247     | 23/16969  | 0.004351 | 0.375998 | 0.372662 | 8.960922    | AKR1C2/AKR1C3/MIOX                                                                                                 | 3                 |
| GO:0004722 | protein serine/threonine phosphatase activity                                                                                                                                                     | molecular function | 4/247     | 49/16969  | 0.005557 | 0.375998 | 0.372662 | 5.608196    | CTDSP2/DUSP4/PPA2/UBLCP1                                                                                           | 4                 |
| GO:0003755 | peptidyl-prolyl cis-trans isomerase activity                                                                                                                                                      | molecular function | 3/247     | 26/16969  | 0.006186 | 0.375998 | 0.372662 | 7.92697     | FKBP11/FKBP2/FKBP8                                                                                                 | 3                 |
| GO:0016859 | cis-trans isomerase activity                                                                                                                                                                      | molecular function | 3/247     | 28/16969  | 0.007629 | 0.375998 | 0.372662 | 7.360758    | FKBP11/FKBP2/FKBP8                                                                                                 | 3                 |
| GO:0016614 | oxidoreductase activity, acting on CH-OH group of donors                                                                                                                                          | molecular function | 6/247     | 120/16969 | 0.008242 | 0.375998 | 0.372662 | 3.43502     | AKR1C2/AKR1C3/CBR1/DHRS4/MIOX/VKORC1L1                                                                             | 6                 |
| GO:0016655 | oxidoreductase activity, acting on NAD(P)H, quinone or similar compound as acceptor                                                                                                               | molecular function | 4/247     | 57/16969  | 0.009467 | 0.375998 | 0.372662 | 4.821081    | AKR1C2/AKR1C3/CBR1/DHRS4                                                                                           | 4                 |
| GO:0097718 | disordered domain specific binding                                                                                                                                                                | molecular function | 3/247     | 31/16969  | 0.010139 | 0.375998 | 0.372662 | 6.648426    | FKBP8/KCNA1/GAPDH<br>GABPB1/APOA2/BCL2/HIST2H3D/PEF1/SMC4/SRGAP2C/TMCC1/HAND2/H2BFWT/HIST1H2A1/HIST4H4/NFYC/SUCLG2 | 3                 |
| GO:0046982 | protein heterodimerization activity                                                                                                                                                               | molecular function | 14/247    | 497/16969 | 0.014367 | 0.480885 | 0.476619 | 1.935223    | BCL2/EIF2AK3/PPP1R3G/SYK/JAK1/VCP/MAGI2                                                                            | 14                |
| GO:0019902 | phosphatase binding                                                                                                                                                                               | molecular function | 7/247     | 177/16969 | 0.015129 | 0.480885 | 0.476619 | 2.716965    | BCL2/EIF2AK3/PPP1R3G/SYK/JAK1/VCP/MAGI2                                                                            | 7                 |
| GO:0004715 | non-membrane spanning protein tyrosine kinase activity                                                                                                                                            | molecular function | 3/247     | 37/16969  | 0.016446 | 0.487889 | 0.483561 | 5.570303    | CLK1/SYK/JAK1                                                                                                      | 3                 |
| GO:0016706 | oxidoreductase activity, acting on paired donors, with incorporation or reduction of molecular oxygen, 2-oxoglutarate as one donor, and incorporation of one atom each of oxygen into both donors | molecular function | 3/247     | 40/16969  | 0.020259 | 0.514465 | 0.509901 | 5.15253     | ASPHD1/EGLN1/KDM4C                                                                                                 | 3                 |
| GO:0016616 | oxidoreductase activity, acting on the CH-OH group of donors, NAD or NADP as acceptor                                                                                                             | molecular function | 5/247     | 108/16969 | 0.02084  | 0.514465 | 0.509901 | 3.180574    | AKR1C2/AKR1C3/CBR1/DHRS4/MIOX                                                                                      | 5                 |
| GO:0005201 | extracellular matrix structural constituent                                                                                                                                                       | molecular function | 6/247     | 158/16969 | 0.028244 | 0.514465 | 0.509901 | 2.608876    | CHI3L1/COL4A5/COL9A2/FGA/FMOD/IGFBP7                                                                               | 6                 |
| GO:0016853 | isomerase activity                                                                                                                                                                                | molecular function | 5/247     | 122/16969 | 0.03299  | 0.514465 | 0.509901 | 2.81559     | FKBP11/FKBP2/FKBP8/HPGDS/K                                                                                         | 5                 |

| GO ID      | GO Term                                       | Category           | Count | bgCount   | pvalue   | padj     | qvalue   | enrichScore | Overlap Genes                 | Count |
|------------|-----------------------------------------------|--------------------|-------|-----------|----------|----------|----------|-------------|-------------------------------|-------|
| GO:0070888 | E-box binding                                 | molecular function | 3/247 | 49/16969  | 0.034364 | 0.514465 | 0.509901 | 4.206147    | ATNAL1<br>SFPQ/HAND2/TFAP4    | 3     |
| GO:0019903 | protein phosphatase binding                   | molecular function | 5/247 | 132/16969 | 0.043906 | 0.514465 | 0.509901 | 2.602288    | BCL2/EIF2AK3/PPP1R3G/JAK1/VCP | 5     |
| GO:0015171 | amino acid transmembrane transporter activity | molecular function | 3/247 | 55/16969  | 0.045956 | 0.514465 | 0.509901 | 3.747295    | SLC25A22/SLC36A1/SLC6A18      | 3     |

**Supplementary Table 13. Detailed KEGG analysis of ci-genes of differentially expressed lncRNAs.**

| databaseID | Description                             | geneRatio | bgRatio  | pvalue   | padj     | qvalue   | enrichScore | overlapGeneList                               | overlapGeneCount |
|------------|-----------------------------------------|-----------|----------|----------|----------|----------|-------------|-----------------------------------------------|------------------|
| hsa04724   | Glutamatergic synapse                   | 5/102     | 114/7946 | 0.015404 | 0.823484 | 0.823484 | 3.416753    | GNAI1/GNG11/GRM6/DLGAP1/SHANK2                | 5                |
| hsa05034   | Alcoholism                              | 6/102     | 184/7946 | 0.030703 | 0.823484 | 0.823484 | 2.540281    | GNAI1/GNG11/HIST2H3D/H2BFWT/HIST1H2AI/HIST4H4 | 6                |
| hsa05202   | Transcriptional misregulation in cancer | 6/102     | 186/7946 | 0.032134 | 0.823484 | 0.823484 | 2.512966    | HIST2H3D/IGFBP3/TGFB2/ID2/SIX1/ZBTB16         | 6                |
| hsa04974   | Protein digestion and absorption        | 4/102     | 95/7946  | 0.033515 | 0.823484 | 0.823484 | 3.280083    | COL4A5/COL9A2/SLC36A1/SLC7A7                  | 4                |
| hsa00240   | Pyrimidine metabolism                   | 3/102     | 57/7946  | 0.036469 | 0.823484 | 0.823484 | 4.100103    | DCTD/NT5E/NT5M                                | 3                |
| hsa05134   | Legionellosis                           | 3/102     | 57/7946  | 0.036469 | 0.823484 | 0.823484 | 4.100103    | CLK1/RAB1A/VCP                                | 3                |
| hsa00590   | Arachidonic acid metabolism             | 3/102     | 63/7946  | 0.046869 | 0.823484 | 0.823484 | 3.709617    | AKR1C3/CBR1/HPGDS                             | 3                |

Please browse Full Text version to see the data of Supplementary Table 14.

**Supplementary Table 14. Detailed GO analysis (biological process) of parent genes of differentially expressed circRNAs.**

**Supplementary Table 15. Detailed GO analysis(cellular component) of parent genes of differentially expressed circRNAs.**

| Database ID | Description                      | type               | geneRatio | bgRatio   | pvalue   | padj     | qvalue   | enrichScore | Overlap GeneList | Overlap GeneCount |
|-------------|----------------------------------|--------------------|-----------|-----------|----------|----------|----------|-------------|------------------|-------------------|
| GO:0070603  | SWI/SNF superfamily-type complex | cellular component | 2/9       | 68/18678  | 0.000462 | 0.013516 | 0.007114 | 61.03922    | YY1AP1/BAZ1A     | 2                 |
| GO:1904949  | ATPase complex                   | cellular component | 2/9       | 92/18678  | 0.000845 | 0.013516 | 0.007114 | 45.11594    | YY1AP1/BAZ1A     | 2                 |
| GO:0097524  | sperm plasma membrane            | cellular component | 1/9       | 6/18678   | 0.002888 | 0.030805 | 0.016213 | 345.8889    | ABHD2            | 1                 |
| GO:0031010  | ISWI-type complex                | cellular component | 1/9       | 11/18678  | 0.005289 | 0.038433 | 0.020228 | 188.6667    | BAZ1A            | 1                 |
| GO:0031011  | Ino80 complex                    | cellular component | 1/9       | 15/18678  | 0.007206 | 0.038433 | 0.020228 | 138.3556    | YY1AP1           | 1                 |
| GO:0033202  | DNA helicase complex             | cellular component | 1/9       | 15/18678  | 0.007206 | 0.038433 | 0.020228 | 138.3556    | YY1AP1           | 1                 |
| GO:0000790  | nuclear chromatin                | cellular component | 2/9       | 309/18678 | 0.009095 | 0.041578 | 0.021883 | 13.43258    | YY1AP1/BAZ1A     | 2                 |
| GO:0097346  | INO80-type complex               | cellular component | 1/9       | 22/18678  | 0.010553 | 0.042213 | 0.022217 | 94.33333    | YY1AP1           | 1                 |
| GO:0044454  | nuclear chromosome part          | cellular component | 2/9       | 469/18678 | 0.020151 | 0.071649 | 0.03771  | 8.850036    | YY1AP1/BAZ1A     | 2                 |
| GO:0000785  | chromatin                        | cellular component | 2/9       | 500/18678 | 0.022729 | 0.072732 | 0.03828  | 8.301333    | YY1AP1/BAZ1A     | 2                 |
| GO:0015030  | Cajal body                       | cellular component | 1/9       | 75/18678  | 0.035571 | 0.096195 | 0.050629 | 27.67111    | HNRNPA2B1        | 1                 |
| GO:0071013  | catalytic step 2 spliceosome     | cellular component | 1/9       | 82/18678  | 0.038833 | 0.096195 | 0.050629 | 25.30894    | HNRNPA2B1        | 1                 |
| GO:0036126  | sperm flagellum                  | cellular component | 1/9       | 84/18678  | 0.039763 | 0.096195 | 0.050629 | 24.70635    | ABHD2            | 1                 |
| GO:0097729  | 9+2 motile cilium                | cellular component | 1/9       | 89/18678  | 0.042085 | 0.096195 | 0.050629 | 23.31835    | ABHD2            | 1                 |
| GO:0001669  | acrosomal vesicle                | cellular component | 1/9       | 103/18678 | 0.04856  | 0.099885 | 0.052571 | 20.14887    | ABHD2            | 1                 |
| GO:0016363  | nuclear matrix                   | cellular component | 1/9       | 106/18678 | 0.049942 | 0.099885 | 0.052571 | 19.57862    | HNRNPA2B1        | 1                 |

**Supplementary Table 16. Detailed GO analysis (molecular function) of parent genes of differentially expressed circRNAs.**

| Database ID | Description                                   | type               | geneRatio | bgRatio  | pvalue   | padj     | qvalue   | enrichScore | Overlap GeneList | overlapGene Count |
|-------------|-----------------------------------------------|--------------------|-----------|----------|----------|----------|----------|-------------|------------------|-------------------|
| GO:0097157  | pre-mRNA intronic binding                     | molecular function | 1/10      | 6/16969  | 0.003531 | 0.047093 | 0.022776 | 282.8167    | HNRNPA2B1        | 1                 |
| GO:0047372  | acylglycerol lipase activity                  | molecular function | 1/10      | 7/16969  | 0.004119 | 0.047093 | 0.022776 | 242.4143    | ABHD2            | 1                 |
| GO:1990247  | methyladenosine-containing RNA binding        | molecular function | 1/10      | 7/16969  | 0.004119 | 0.047093 | 0.022776 | 242.4143    | HNRNPA2B1        | 1                 |
| GO:0098505  | G-rich strand telomeric DNA binding           | molecular function | 1/10      | 10/16969 | 0.005879 | 0.047093 | 0.022776 | 169.69      | HNRNPA2B1        | 1                 |
| GO:0043047  | single-stranded telomeric DNA binding         | molecular function | 1/10      | 11/16969 | 0.006465 | 0.047093 | 0.022776 | 154.2636    | HNRNPA2B1        | 1                 |
| GO:0098847  | sequence-specific single stranded DNA binding | molecular function | 1/10      | 13/16969 | 0.007637 | 0.047093 | 0.022776 | 130.5308    | HNRNPA2B1        | 1                 |

|                |                                                          |                       |      |               |              |          |          |          |                  |   |
|----------------|----------------------------------------------------------|-----------------------|------|---------------|--------------|----------|----------|----------|------------------|---|
| GO:0035<br>198 | miRNA<br>binding                                         | molecular<br>function | 1/10 | 31/16969      | 0.0181<br>24 | 0.077857 | 0.037655 | 54.73871 | HNRNPA2<br>B1    | 1 |
| GO:0042<br>162 | telomeric<br>DNA binding<br>DNA-binding<br>transcription | molecular<br>function | 1/10 | 34/16969      | 0.0198<br>62 | 0.077857 | 0.037655 | 49.90882 | HNRNPA2<br>B1    | 1 |
| GO:0001<br>228 | activator<br>activity, RNA<br>polymerase<br>II-specific  | molecular<br>function | 2/10 | 390/1696<br>9 | 0.0209<br>86 | 0.077857 | 0.037655 | 8.702051 | BCL11B/P<br>RDM2 | 2 |
| GO:0061<br>980 | regulatory<br>RNA binding<br>histone-lysine              | molecular<br>function | 1/10 | 37/16969      | 0.0215<br>97 | 0.077857 | 0.037655 | 45.86216 | HNRNPA2<br>B1    | 1 |
| GO:0018<br>024 | N-<br>methyltransfe<br>rase activity                     | molecular<br>function | 1/10 | 43/16969      | 0.0250<br>6  | 0.077857 | 0.037655 | 39.46279 | PRDM2            | 1 |
| GO:0042<br>054 | histone<br>methyltransfe<br>rase activity<br>steroid     | molecular<br>function | 1/10 | 52/16969      | 0.0302<br>33 | 0.077857 | 0.037655 | 32.63269 | PRDM2            | 1 |
| GO:0003<br>707 | hormone<br>receptor<br>activity                          | molecular<br>function | 1/10 | 54/16969      | 0.0313<br>79 | 0.077857 | 0.037655 | 31.42407 | ABHD2            | 1 |
| GO:0036<br>002 | pre-mRNA<br>binding<br>protein-lysine                    | molecular<br>function | 1/10 | 54/16969      | 0.0313<br>79 | 0.077857 | 0.037655 | 31.42407 | HNRNPA2<br>B1    | 1 |
| GO:0016<br>279 | N-<br>methyltransfe<br>rase activity                     | molecular<br>function | 1/10 | 57/16969      | 0.0330<br>96 | 0.077857 | 0.037655 | 29.77018 | PRDM2            | 1 |
| GO:0016<br>278 | lysine N-<br>methyltransfe<br>rase activity              | molecular<br>function | 1/10 | 58/16969      | 0.0336<br>68 | 0.077857 | 0.037655 | 29.2569  | PRDM2            | 1 |
| GO:0003<br>730 | mRNA 3'-<br>UTR binding                                  | molecular<br>function | 1/10 | 67/16969      | 0.0388       | 0.084446 | 0.040842 | 25.32687 | HNRNPA2<br>B1    | 1 |
| GO:0008<br>276 | protein<br>methyltransfe<br>rase activity                | molecular<br>function | 1/10 | 80/16969      | 0.0461<br>69 | 0.087124 | 0.042137 | 21.21125 | PRDM2            | 1 |
| GO:0042<br>562 | hormone<br>binding                                       | molecular<br>function | 1/10 | 81/16969      | 0.0467<br>34 | 0.087124 | 0.042137 | 20.94938 | ABHD2            | 1 |
| GO:0008<br>170 | N-<br>methyltransfe<br>rase activity                     | molecular<br>function | 1/10 | 86/16969      | 0.0495<br>53 | 0.087124 | 0.042137 | 19.7314  | PRDM2            | 1 |

#### Supplementary Table 17. Detailed KEGG analysis of parent genes of differentially expressed circRNAs.

| databaseID | Description        | geneRatio | bgRatio | pvalue   | padj     | qvalue   | enrichScore | overlapGeneList | overlapGeneCount |
|------------|--------------------|-----------|---------|----------|----------|----------|-------------|-----------------|------------------|
| hsa00310   | Lysine degradation | 1/3       | 61/7946 | 0.022857 | 0.039856 | 0.013984 | 43.42077    | PRDM2           | 1                |
| hsa04520   | Adherens junction  | 1/3       | 71/7946 | 0.02657  | 0.039856 | 0.013984 | 37.30516    | LMO7            | 1                |

Please browse Full Text version to see the data of Supplementary Tables 18 to 20.

#### Supplementary Table 18. Detailed GSEA(biological process) of differentially expressed mRNAs.

#### Supplementary Table 19. Detailed GSEA(KEGG) of differentially expressed mRNAs.

#### Supplementary Table 20. The network degree analysis of all the differentially-expressed mRNAs using CytoHubba.
