# Supplementary material for: Overexpression of miR-10a-5p facilitates the progression of osteoarthritis
Source: Aging (Albany NY). 2020 Apr 13;12(7):5948–76. doi: 10.18632/aging.102989 (PMC7185093; doi:10.18632/aging.102989)
Supplement: Supplementary Table 2 [file aging-12-102989-s006..xlsx]

## Sheet: Sheet 1
Table S2: Detailed differentially expressed mRNAs between miR-10a-5p overexpression group(exp) and control group(ctrl).
Gene_symbol	Description	logFC	foldChange	PValue	pAdj	diffState	M1	M2	NC-3	NC-4
RPL36A-HNRNPH2	RPL36A-HNRNPH2 readthrough	13.3973	10789.5	0	0	up	81.4649	74.3234	0	0
VTN	vitronectin	9.90544	959.035	2.28555e-46	1.9526e-44	up	7.66521	6.16398	0	0
GC	group-specific component (vitamin D binding protein)	9.8873	947.055	3.9621e-39	2.63667e-37	up	8.67176	4.9786	0	0
SERPINC1	serpin peptidase inhibitor, clade C (antithrombin), member 1	9.56666	758.316	4.07737e-35	2.26115e-33	up	6.58124	4.3464	0	0
KNG1	kininogen 1	9.39211	671.902	1.22887e-32	6.14146e-31	up	5.72955	3.95127	0	0
CYP3A4	cytochrome P450, family 3, subfamily A, polypeptide 4	9.38803	670.004	3.81759e-24	1.19776e-22	up	7.27808	2.37076	0	0
AHSG	alpha-2-HS-glycoprotein	9.35717	655.827	8.20475e-33	4.14963e-31	up	5.41985	4.0303	0	0
APOA2	apolipoprotein A-II	9.34514	650.379	2.899e-32	1.42073e-30	up	5.41985	3.95127	0	0
HRG	histidine-rich glycoprotein	9.21939	596.091	3.86888e-29	1.58825e-27	up	5.18757	3.39809	0	0
TTR	transthyretin	9.08067	541.446	1.26235e-24	4.08212e-23	up	5.26499	2.52881	0	0
FGA	fibrinogen alpha chain	9.01531	517.461	6.33302e-154	4.71028e-151	up	30.506	24.3398	0.0947196	0
HMGCS2	3-hydroxy-3-methylglutaryl-CoA synthase 2 (mitochondrial)	8.8494	461.25	2.69176e-25	9.12456e-24	up	3.48419	3.16102	0	0
LTF	lactotransferrin	8.7421	428.187	2.10638e-21	5.48006e-20	up	4.02617	2.13369	0	0
TAT	tyrosine aminotransferase	8.66875	406.963	4.52557e-22	1.23588e-20	up	3.32933	2.52881	0	0
ALDOB	aldolase B, fructose-bisphosphate	8.59054	385.488	1.60536e-71	2.78058e-69	up	13.1625	10.0362	0.0473598	0
CYP2C8	cytochrome P450, family 2, subfamily C, polypeptide 8	8.50639	363.645	4.05845e-20	9.68207e-19	up	3.01963	2.21271	0	0
APOB	apolipoprotein B	8.44241	347.872	1.16083e-192	1.33432e-189	up	72.7808	43.7011	0.142079	0.17735
ITIH1	inter-alpha-trypsin inhibitor heavy chain 1	8.43696	346.56	3.22963e-16	5.90107e-15	up	3.79389	1.18538	0	0
AMBP	alpha-1-microglobulin/bikunin precursor	8.30717	316.744	2.82054e-57	3.33298e-55	up	11.3043	7.74449	0	0.0443375
LYZ	lysozyme	8.24774	303.961	1.39523e-16	2.6058e-15	up	2.78735	1.58051	0	0
G6PC	glucose-6-phosphatase, catalytic subunit	8.21989	298.149	5.01327e-15	8.38464e-14	up	3.17448	1.10636	0	0
APOH	apolipoprotein H (beta-2-glycoprotein I)	8.20335	294.751	1.54396e-55	1.69755e-53	up	10.2977	7.42839	0	0.0443375
SLC2A2	solute carrier family 2 (facilitated glucose transporter), member 2	8.16837	287.69	8.48722e-16	1.50087e-14	up	2.70992	1.42246	0	0
A1CF	APOBEC1 complementation factor	8.14477	283.022	1.57192e-15	2.74522e-14	up	1.31625	2.76589	0	0
HABP2	hyaluronan binding protein 2	8.11706	277.637	5.47584e-15	9.12207e-14	up	1.23882	2.76589	0	0
HP	haptoglobin	8.11554	277.345	1.6668e-98	5.01787e-96	up	36.2611	18.4848	0.0473598	0.133013
UGT2B10	UDP glucuronosyltransferase 2 family, polypeptide B10	8.0289	261.18	7.72587e-15	1.27756e-13	up	1.39367	2.37076	0	0
PAH	phenylalanine hydroxylase	7.96806	250.394	3.31173e-14	5.16319e-13	up	1.23882	2.37076	0	0
BHMT	betaine--homocysteine S-methyltransferase	7.96558	249.965	1.3903e-14	2.23367e-13	up	2.16794	1.42246	0	0
C4BPA	complement component 4 binding protein, alpha	7.76519	217.549	7.03309e-13	9.80446e-12	up	1.78081	1.34343	0	0
MAT1A	methionine adenosyltransferase I, alpha	7.61367	195.859	1.33394e-11	1.63117e-10	up	1.70338	1.10636	0	0
FGB	fibrinogen beta chain	7.5662	189.519	2.88324e-143	1.91872e-140	up	24.3893	21.732	0.189439	0.0443375
CYP2A6	cytochrome P450, family 2, subfamily A, polypeptide 6	7.43946	173.58	1.70203e-10	1.84725e-09	up	1.30618	1.18538	0	0
ALB	albumin	7.26384	153.686	3.3134e-200	4.18946e-197	up	212.845	114.666	1.79967	0.3547
CES1	carboxylesterase 1	7.25676	152.933	6.45891e-26	2.26851e-24	up	6.50382	2.68686	0.0473598	0
HPX	hemopexin	7.1298	140.05	2.27047e-22	6.33727e-21	up	6.34896	2.05466	0	0.0443375
S100A9	S100 calcium binding protein A9	6.98561	126.729	1.62295e-18	3.48397e-17	up	6.27154	1.34343	0.0473598	0
PLG	plasminogen	6.93012	121.948	2.34107e-29	9.76914e-28	up	9.60087	3.31907	0.0947196	0
APOA1	apolipoprotein A-I	6.84341	114.834	2.00747e-51	1.983e-49	up	10.6074	6.79619	0.0473598	0.0886751
FGG	fibrinogen gamma chain	6.58417	95.947	3.09615e-75	5.93148e-73	up	16.7241	10.9845	0.0947196	0.17735
PCK1	phosphoenolpyruvate carboxykinase 1 (soluble)	6.53928	93.0075	1.83152e-35	1.02923e-33	up	5.26499	4.58347	0.0947196	0
F5	coagulation factor V (proaccelerin, labile factor)	6.50932	91.0962	6.84624e-21	1.70401e-19	up	3.17448	2.29174	0	0.0443375
C9	complement component 9	6.28853	78.1694	2.37946e-18	5.0735e-17	up	1.93566	2.76589	0.0473598	0
ITIH3	inter-alpha-trypsin inhibitor heavy chain 3	5.9959	63.8182	1.89962e-15	3.29549e-14	up	2.16794	1.65953	0.0473598	0
CYP2C9	cytochrome P450, family 2, subfamily C, polypeptide 9	5.965	62.4662	1.43641e-14	2.29898e-13	up	2.47764	1.26441	0.0473598	0
ALDH1A1	aldehyde dehydrogenase 1 family, member A1	5.84209	57.3646	4.45577e-14	6.8958e-13	up	1.93566	1.50148	0	0.0443375
ITIH4	inter-alpha-trypsin inhibitor heavy chain family, member 4	5.80909	56.0675	4.16459e-21	1.06164e-19	up	3.87132	2.05466	0.0947196	0
SERPINF2	serpin peptidase inhibitor, clade F (alpha-2 antiplasmin, pigment epithelium derived factor), member 2	5.77437	54.7343	3.80974e-13	5.47391e-12	up	2.16794	1.10636	0	0.0443375
CYP2E1	cytochrome P450, family 2, subfamily E, polypeptide 1	5.67422	51.0636	1.92196e-33	9.95954e-32	up	6.11668	3.95127	0.0947196	0.0886751
ORM1	orosomucoid 1	5.57549	47.686	1.24764e-17	2.51197e-16	up	3.60188	1.42957	0.0473598	0.0443375
ANGPTL3	angiopoietin-like 3	5.51355	45.6818	1.0907e-11	1.34413e-10	up	1.54853	1.18538	0	0.0443375
HBB	hemoglobin, beta	5.4419	43.4685	1.58635e-47	1.42254e-45	up	6.42639	8.13962	0.236799	0.0886751
ADH4	alcohol dehydrogenase 4 (class II), pi polypeptide	5.39874	42.1875	1.24386e-39	8.41038e-38	up	6.89095	5.2947	0.189439	0.0886751
SPOCK2	sparc/osteonectin, cwcv and kazal-like domains proteoglycan (testican) 2	5.38526	41.7949	5.45887e-11	6.18477e-10	up	1.31625	1.18538	0	0.0443375
BAAT	bile acid CoA:amino acid N-acyltransferase	5.14724	35.4384	3.15617e-14	4.92674e-13	up	2.70992	1.02733	0.0947196	0
GATM	glycine amidinotransferase (L-arginine:glycine amidinotransferase)	5.07018	33.595	5.87928e-27	2.1864e-25	up	6.27154	3.39809	0	0.266025
TF	transferrin	5.05009	33.1306	2.33134e-76	4.60585e-74	up	27.3315	15.568	0.568318	0.709401
DYSF	dysferlin	4.97816	31.5192	3.98501e-19	8.83973e-18	up	2.16794	2.60784	0.0947196	0.0443375
HBA2	hemoglobin, alpha 2	4.85127	28.8654	1.63286e-35	9.25822e-34	up	10.0492	38.6513	0.634148	1.03085
CXADR	coxsackie virus and adenovirus receptor	4.81531	28.1548	1.21359e-12	1.66609e-11	up	1.70338	1.26441	0.0473598	0.0443375
HBA1	hemoglobin, alpha 1	4.81406	28.1305	2.34362e-33	1.2095e-31	up	5.1264	11.2137	0.313048	0.254941
CD36	CD36 molecule (thrombospondin receptor)	4.75827	27.0635	2.68368e-275	8.4831e-272	up	81.8397	64.8008	2.88895	2.52724
CFHR1	complement factor H-related 1	4.67655	25.573	2.25932e-12	3.01656e-11	up	1.69409	1.21225	0.103244	0
COMP	cartilage oligomeric matrix protein	4.24896	19.0136	2.07957e-24	6.63992e-23	up	6.42639	3.39809	0.236799	0.266025
AZGP1	alpha-2-glycoprotein 1, zinc-binding	4.18995	18.2515	1.60217e-12	2.17125e-11	up	2.01309	1.58051	0.189439	0
PI3	peptidase inhibitor 3, skin-derived	3.8777	14.6995	3.83038e-10	4.00921e-09	up	1.4711	1.42246	0.189439	0
SAA2	serum amyloid A2	3.832	14.2412	9.5787e-26	3.3091e-24	up	7.37254	4.3219	0.384562	0.42298
A2M	alpha-2-macroglobulin	3.72218	13.1973	3.04039e-35	1.69351e-33	up	10.6074	7.03326	0.331519	0.975426
STK32A	serine/threonine kinase 32A	3.67246	12.7503	7.89288e-12	9.86142e-11	up	1.62595	2.05466	0.236799	0.0443375
CLCA2	chloride channel accessory 2	3.63779	12.4476	3.67008e-26	1.3131e-24	up	5.26499	4.58347	0.331519	0.443375
HPGD	hydroxyprostaglandin dehydrogenase 15-(NAD)	3.57772	11.9399	9.14649e-15	1.49803e-13	up	2.24537	2.84491	0.331519	0.0886751
ITGB2	integrin, beta 2 (complement component 3 receptor 3 and 4 subunit)	3.45939	10.9997	8.93115e-11	9.96695e-10	up	2.40022	1.26441	0.189439	0.133013
PRG4	proteoglycan 4	3.40998	10.6294	6.59071e-100	2.08332e-97	up	27.6412	24.4979	1.84703	3.01495
C8orf87	chromosome 8 open reading frame 87	3.38637	10.4568	2.16415e-14	3.42044e-13	up	2.70992	2.21271	0.236799	0.221688
SERPIND1	serpin peptidase inhibitor, clade D (heparin cofactor), member 1	3.30624	9.89185	1.43229e-16	2.67107e-15	up	3.09706	2.92394	0.378879	0.221688
ADH6	alcohol dehydrogenase 6 (class V)	3.27951	9.71028	1.61054e-07	1.17914e-06	up	1.23882	1.10636	0	0.221688
VNN1	vanin 1	3.24971	9.51174	7.34982e-16	1.31444e-14	up	2.9422	2.84491	0.331519	0.266025
TTN	titin	3.21335	9.27501	5.70821e-50	5.46777e-48	up	11.4591	13.7504	1.51551	1.19711
FOS	FBJ murine osteosarcoma viral oncogene homolog	3.21168	9.26429	7.64223e-38	4.78358e-36	up	11.9237	8.53474	0.994556	1.19711
CRLF1	cytokine receptor-like factor 1	3.12054	8.69711	1.5674e-38	1.01632e-36	up	9.52345	8.92987	1.32607	0.798076
ADAM8	ADAM metallopeptidase domain 8	3.11733	8.67783	1.86831e-08	1.58099e-07	up	1.78081	1.10636	0.142079	0.17735
ADH7	alcohol dehydrogenase 7 (class IV), mu or sigma polypeptide	3.08275	8.47227	6.76239e-11	7.62745e-10	up	1.78081	2.21271	0.284159	0.17735
AGR2	anterior gradient 2, protein disulphide isomerase family member	3.07713	8.43936	3.11353e-21	8.01781e-20	up	5.18757	4.18835	0.520958	0.576388
LPL	lipoprotein lipase	3.07669	8.43679	8.81469e-08	6.65391e-07	up	1.23882	1.18538	0.0947196	0.17735
THSD7A	thrombospondin, type I, domain containing 7A	2.99627	7.97937	6.61757e-08	5.1051e-07	up	1.54853	1.10636	0.142079	0.17735
IFI27	interferon, alpha-inducible protein 27	2.99372	7.96524	5.3044e-15	8.85982e-14	up	6.34896	2.84491	0.473598	0.665063
ITIH2	inter-alpha-trypsin inhibitor heavy chain 2	2.97255	7.84921	2.67447e-10	2.84407e-09	up	6.7361	2.92394	0	1.19711
LINC01002	long intergenic non-protein coding RNA 1002	2.96237	7.79404	3.30496e-09	3.06363e-08	up	2.05102	1.49121	0.456075	0
C4B	complement component 4B (Chido blood group)	2.84566	7.18833	1.23855e-16	2.32004e-15	up	4.3413	3.50636	0.49491	0.582595
C4B_2	complement component 4B (Chido blood group), copy 2	2.84566	7.18833	1.23855e-16	2.32004e-15	up	4.3413	3.50636	0.49491	0.582595
ADH1C	alcohol dehydrogenase 1C (class I), gamma polypeptide	2.83729	7.14677	3.17824e-10	3.35342e-09	up	3.53142	1.52519	0.429554	0.271346
SERPINA1	serpin peptidase inhibitor, clade A (alpha-1 antiproteinase, antitrypsin), member 1	2.7766	6.85234	3.83173e-66	5.324e-64	up	29.6543	22.1271	3.36255	4.16773
CTAGE4	CTAGE family, member 4	2.74678	6.71216	1.23877e-06	7.85899e-06	up	1.1614	1.53467	0.401138	0
C2CD4A	C2 calcium-dependent domain containing 4A	2.74364	6.69759	7.00412e-10	7.10845e-09	up	3.56161	1.42246	0.426238	0.310363
DIRC1	disrupted in renal carcinoma 1	2.74037	6.68243	1.37589e-09	1.34858e-08	up	1.78081	1.97564	0.284159	0.266025
FABP4	fatty acid binding protein 4, adipocyte	2.63767	6.22325	4.00477e-75	7.55766e-73	up	23.7699	24.814	4.45182	3.36965
KIAA0408	KIAA0408	2.63011	6.19074	1.71658e-23	5.10692e-22	up	10.1847	8.93777	0.694295	2.34767
PDK4	pyruvate dehydrogenase kinase, isozyme 4	2.61746	6.1367	0	0	up	684.914	610.471	106.465	104.637
CP	ceruloplasmin (ferroxidase)	2.60654	6.09043	1.54261e-55	1.69755e-53	up	17.5758	17.3856	3.12575	2.61591
OAS1	2'-5'-oligoadenylate synthetase 1, 40/46kDa	2.59577	6.04513	4.20073e-21	1.06869e-19	up	9.29117	5.68983	0.994556	1.46314
CNTNAP4	contactin associated protein-like 4	2.58467	5.99877	5.41865e-20	1.28063e-18	up	5.80698	4.9786	0.947196	0.842413
DLK1	delta-like 1 homolog (Drosophila)	2.58371	5.99478	2.25504e-78	4.67423e-76	up	24.4667	25.0511	4.40446	3.85737
PLIN1	perilipin 1	2.58097	5.98342	2.86307e-24	9.05017e-23	up	6.58124	6.63813	0.994556	1.19711
MX1	MX dynamin-like GTPase 1	2.52634	5.76107	8.86676e-17	1.68588e-15	up	26.9444	8.37669	2.74687	3.36965
SEMA3E	sema domain, immunoglobulin domain (Ig), short basic domain, secreted, (semaphorin) 3E	2.52218	5.74448	9.70642e-24	2.92209e-22	up	6.34896	7.66546	1.13664	1.28579
CLU	clusterin	2.51212	5.70456	1.95522e-267	4.1203e-264	up	136.193	142.878	24.1535	24.7403
CD38	CD38 molecule	2.50388	5.67208	1.97867e-09	1.89245e-08	up	2.32279	1.89661	0.331519	0.399038
MYO1F	myosin IF	2.47878	5.57424	5.56871e-09	5.02959e-08	up	1.78081	2.37076	0.284159	0.443375
DOCK8	dedicator of cytokinesis 8	2.45087	5.46747	3.75621e-26	1.33784e-24	up	7.89749	10.4314	1.37343	1.95085
CHI3L1	chitinase 3-like 1 (cartilage glycoprotein-39)	2.37337	5.18149	1.55749e-243	2.81327e-240	up	680.733	554.363	118.115	120.243
SAA1	serum amyloid A1	2.35525	5.11682	1.1529e-44	9.11081e-43	up	16.7071	15.2764	2.88327	3.34571
LIMS3-LOC440895		2.33306	5.03873	4.32659e-06	2.50942e-05	up	1.30463	1.30392	0.177126	0.324551
DIO3	deiodinase, iodothyronine, type III	2.32493	5.01042	4.63857e-06	2.66955e-05	up	1.4711	1.10636	0.189439	0.310363
FGL2	fibrinogen-like 2	2.32349	5.0054	4.26103e-06	2.47253e-05	up	2.24537	1.02733	0.568318	0.0886751
GJB2	gap junction protein, beta 2, 26kDa	2.29906	4.92138	4.40869e-07	3.02132e-06	up	1.93566	1.50148	0.426238	0.266025
APOC3	apolipoprotein C-III	2.28785	4.88329	1.15566e-10	1.27728e-09	up	3.56161	2.52881	0.663037	0.576388
CLDN1	claudin 1	2.25861	4.78529	1.28842e-33	6.75964e-32	up	12.6205	11.7748	2.79423	2.30555
OAS2	2'-5'-oligoadenylate synthetase 2, 69/71kDa	2.23525	4.70845	1.19475e-17	2.40931e-16	up	18.5823	8.13962	2.55743	3.10363
TM4SF18	transmembrane 4 L six family member 18	2.22365	4.67072	2.53916e-06	1.52809e-05	up	1.93566	1.10636	0.331519	0.310363
GCOM1	GRINL1A complex locus 1	2.21031	4.62775	6.05307e-05	0.000276699	up	1.00887	1.20672	0.30926	0.162275
LBP	lipopolysaccharide binding protein	2.17497	4.51577	2.8111e-36	1.64554e-34	up	16.8015	13.8294	3.22047	3.547
HPD	4-hydroxyphenylpyruvate dioxygenase	2.13083	4.3797	1.45902e-113	6.83253e-111	up	53.5791	48.7587	11.84	11.5278
PARD6B	par-6 family cell polarity regulator beta	2.12429	4.35988	1.06584e-12	1.46803e-11	up	6.34896	3.87225	1.184	1.15278
SORL1	sortilin-related receptor, L(DLR class) A repeats containing	2.10366	4.298	1.04124e-06	6.70869e-06	up	2.55507	1.42246	0.473598	0.443375
SULT1C4		2.09057	4.25918	1.45028e-06	9.10491e-06	up	1.78081	1.58051	0.378879	0.399038
CCL5	chemokine (C-C motif) ligand 5	2.08348	4.23828	1.52608e-05	7.9146e-05	up	2.32279	1.02733	0.615678	0.17735
MAOB	monoamine oxidase B	2.07338	4.20872	7.15447e-09	6.36602e-08	up	3.79389	2.21271	0.615678	0.798076
EHF	ets homologous factor	2.06669	4.18923	2.34652e-63	3.12309e-61	up	29.0349	26.0784	6.81981	6.34027
ANKRD22	ankyrin repeat domain 22	2.0615	4.17421	1.2514e-15	2.20065e-14	up	5.65213	5.2947	1.42079	1.19711
GREB1L	growth regulation by estrogen in breast cancer-like	2.0598	4.16928	2.67708e-16	4.90565e-15	up	5.80698	5.68983	1.27872	1.46314
LYVE1	lymphatic vessel endothelial hyaluronan receptor 1	2.05404	4.15266	2.12858e-09	2.03123e-08	up	3.40676	2.52881	0.710397	0.709401
PI15	peptidase inhibitor 15	2.05361	4.15145	4.23182e-08	3.37159e-07	up	2.09051	3.08199	0.378879	0.842413
TNFRSF11B	tumor necrosis factor receptor superfamily, member 11b	2.03733	4.10484	4.02706e-29	1.64252e-27	up	13.1625	11.8538	2.69951	3.36965
TMEM229B	transmembrane protein 229B	2.03468	4.09732	4.47928e-07	3.06306e-06	up	2.09051	1.89661	0.568318	0.399038
VNN3	vanin 3	2.00149	4.00413	0.000105761	0.000460799	up	1.23882	1.18538	0.189439	0.399038
SERPINE2	serpin peptidase inhibitor, clade E (nexin, plasminogen activator inhibitor type 1), member 2	1.99274	3.97991	5.67198e-269	1.43433e-265	up	1545.97	1375.91	373.29	360.908
NDP	Norrie disease (pseudoglioma)	1.97594	3.93383	5.16019e-33	2.63087e-31	up	24.4667	17.2275	5.82526	4.78845
VMO1	vitelline membrane outer layer 1 homolog (chicken)	1.97554	3.93276	1.13272e-21	3.01519e-20	up	8.74918	8.92987	1.98911	2.4829
SCARA5	scavenger receptor class A, member 5	1.97349	3.92718	5.92742e-06	3.33985e-05	up	1.70338	1.58051	0.568318	0.266025
FMO3	flavin containing monooxygenase 3	1.95021	3.86431	2.43624e-05	0.000120847	up	1.39367	1.65953	0.426238	0.3547
GRHL3	grainyhead-like transcription factor 3	1.93122	3.81378	2.61901e-53	2.73676e-51	up	24.0796	24.4979	6.0147	6.69497
ABLIM1	actin binding LIM protein 1	1.92708	3.80284	4.95426e-42	3.7066e-40	up	20.5954	18.9661	5.11486	5.27617
EDNRB	endothelin receptor type B	1.91731	3.77718	3.72445e-08	2.98239e-07	up	4.49073	2.60784	0.615678	1.24145
SERPINA3	serpin peptidase inhibitor, clade A (alpha-1 antiproteinase, antitrypsin), member 3	1.907	3.75028	6.57859e-16	1.18321e-14	up	7.66521	5.92691	1.70495	1.90651
CCR1	chemokine (C-C motif) receptor 1	1.9024	3.73835	2.16334e-08	1.81027e-07	up	3.25191	2.60784	0.852477	0.709401
LCP1	lymphocyte cytosolic protein 1 (L-plastin)	1.90214	3.73767	3.39692e-14	5.28949e-13	up	7.74264	5.2947	1.75231	1.72916
IDUA	iduronidase, alpha-L-	1.89441	3.7177	3.5342e-12	4.62592e-11	up	5.80698	4.42542	1.13664	1.59615
BTG2	BTG family, member 2	1.8908	3.70842	9.16608e-32	4.40197e-30	up	15.9498	14.8568	4.5939	3.72435
C11orf87	chromosome 11 open reading frame 87	1.88815	3.7016	7.54012e-05	0.000338436	up	1.4711	1.10636	0.284159	0.399038
CD24	CD24 molecule	1.88706	3.69881	1.90431e-30	8.50815e-29	up	13.7045	14.4617	3.83615	3.76869
SLC43A2	solute carrier family 43 (amino acid system L transporter), member 2	1.87133	3.65871	7.91615e-14	1.20738e-12	up	6.0501	5.21568	1.61023	1.46358
IL16	interleukin 16	1.86341	3.63866	1.92133e-05	9.7485e-05	up	1.85823	1.34343	0.473598	0.399038
MRO	maestro	1.85628	3.62074	4.79085e-10	4.95302e-09	up	3.79389	4.0303	0.899837	1.24145
AGT	angiotensinogen (serpin peptidase inhibitor, clade A, member 8)	1.85347	3.61369	4.08309e-13	5.84672e-12	up	7.27808	4.9786	1.46815	1.90651
GPX3	glutathione peroxidase 3	1.84812	3.60032	3.50708e-22	9.59816e-21	up	13.5496	10.5104	2.88895	3.76869
LINC01204	long intergenic non-protein coding RNA 1204	1.84807	3.60019	2.54743e-06	1.53234e-05	up	2.09051	1.89661	0.378879	0.709401
UPK1B	uroplakin 1B	1.84329	3.58827	0.000105443	0.000459572	up	1.1614	1.34343	0.378879	0.310363
GUCY1A2	guanylate cyclase 1, soluble, alpha 2	1.8247	3.54233	2.99755e-23	8.79374e-22	up	11.7688	12.328	4.02558	2.79327
ST3GAL5	ST3 beta-galactoside alpha-2,3-sialyltransferase 5	1.81509	3.51883	9.87437e-45	7.8523e-43	up	28.9575	23.8657	6.91453	8.06943
TMEM232	transmembrane protein 232	1.81384	3.51578	1.26906e-08	1.09604e-07	up	4.25845	3.00297	0.805117	1.24145
C4A	complement component 4A (Rodgers blood group)	1.81275	3.5131	5.09913e-08	4.00571e-07	up	3.47412	2.62759	0.620414	1.09558
BMP6	bone morphogenetic protein 6	1.80142	3.48564	9.44147e-16	1.66729e-14	up	6.81352	6.79619	2.03647	1.86218
LRFN1	leucine rich repeat and fibronectin type III domain containing 1	1.801	3.48461	0.000498153	0.0018482	up	1.1614	1.10636	0.236799	0.399038
MGP	matrix Gla protein	1.80023	3.48277	6.21735e-08	4.80808e-07	up	3.40676	2.68686	0.899837	0.842413
GMNC	geminin coiled-coil domain containing	1.78732	3.45174	2.99545e-06	1.78065e-05	up	2.01309	1.97564	0.615678	0.53205
DYX1C1-CCPG1	DYX1C1-CCPG1 readthrough (NMD candidate)	1.77932	3.43263	0.00151438	0.0049851	up	0.807557	2.75087	1.04334	0
DPP4	dipeptidyl-peptidase 4	1.77607	3.42491	8.84541e-235	1.39802e-231	up	361.891	338.545	103.718	100.824
IGFBP2	insulin-like growth factor binding protein 2, 36kDa	1.77397	3.41995	8.02839e-46	6.76739e-44	up	22.8408	24.1818	6.72509	7.00533
CLK4	CDC-like kinase 4	1.75692	3.37975	8.23277e-25	2.71081e-23	up	12.5431	12.2489	3.55199	3.76869
IFI6	interferon, alpha-inducible protein 6	1.75384	3.37254	1.12505e-24	3.66627e-23	up	35.5387	20.3095	7.81437	8.7345
KCNA1	potassium channel, voltage gated shaker related subfamily A, member 1	1.74944	3.36227	2.23981e-09	2.12614e-08	up	4.18102	3.71419	1.37343	0.975426
AJAP1	adherens junctions associated protein 1	1.72654	3.30933	2.12183e-05	0.000106547	up	2.09051	1.58051	0.663037	0.443375
MAP7	microtubule-associated protein 7	1.72175	3.29836	8.63752e-05	0.0003828	up	1.23882	1.81758	0.378879	0.53205
SLC40A1	solute carrier family 40 (iron-regulated transporter), member 1	1.71858	3.29112	5.3958e-24	1.66808e-22	up	12.3882	12.8021	3.55199	4.07905
FER1L6	fer-1-like family member 6	1.69848	3.24558	7.68468e-29	3.10431e-27	up	17.9629	15.489	4.97278	5.3205
BLOC1S5-TXNDC5	BLOC1S5-TXNDC5 readthrough (NMD candidate)	1.68772	3.22147	0.00518424	0.0147967	up	6.75932	6.65236	0	4.13536
LRP1B	low density lipoprotein receptor-related protein 1B	1.68342	3.21188	6.47762e-09	5.80461e-08	up	4.18102	3.63517	1.04192	1.37446
CCND2	cyclin D2	1.67965	3.2035	2.13019e-218	2.99268e-215	up	395.417	424.208	126.924	128.889
BMPER	BMP binding endothelial regulator	1.66007	3.16031	2.33689e-14	3.67966e-13	up	7.27808	6.63813	2.08383	2.30555
FPR1	formyl peptide receptor 1	1.66001	3.16018	0.000706964	0.00253585	up	1.00654	1.34343	0.378879	0.3547
ENPP5	ectonucleotide pyrophosphatase/phosphodiesterase 5 (putative)	1.6566	3.15273	8.65964e-11	9.68104e-10	up	4.72301	4.9786	1.42079	1.64049
HOXA1	homeobox A1	1.65462	3.1484	3.8638e-05	0.000184285	up	2.6325	1.42246	0.520958	0.753738
FAM65B	family with sequence similarity 65, member B	1.65225	3.14323	4.78807e-40	3.29024e-38	up	24.4667	22.0481	7.38813	7.40437
C6	complement component 6	1.65056	3.13954	0.000308368	0.00120303	up	2.16794	1.02733	0.710397	0.310363
GDA	guanine deaminase	1.6417	3.12033	4.9181e-07	3.33787e-06	up	3.32933	3.00297	1.32607	0.709401
SLC26A9	solute carrier family 26 (anion exchanger), member 9	1.63692	3.11	5.79376e-06	3.27037e-05	up	3.25191	1.89661	0.805117	0.842413
HIC1	hypermethylated in cancer 1	1.63554	3.10705	3.40025e-07	2.3766e-06	up	2.6325	3.95127	1.04192	1.0641
ADH1B	alcohol dehydrogenase 1B (class I), beta polypeptide	1.62899	3.09295	4.85131e-149	3.40778e-146	up	178.188	163.873	55.313	55.2836
SULT1C2		1.62681	3.08829	0.00072943	0.00260534	up	1.1614	1.42246	0.615678	0.221688
SMG1P5	SMG1 pseudogene 5	1.62376	3.08178	4.76679e-08	3.76226e-07	up	3.17216	4.66329	1.19205	1.33456
CDKN2A	cyclin-dependent kinase inhibitor 2A	1.60638	3.04486	9.19774e-32	4.40197e-30	up	23.5376	25.4462	6.44094	9.57691
IRF4	interferon regulatory factor 4	1.60435	3.0406	0.000297899	0.00116831	up	1.31625	1.50148	0.520958	0.399038
RGPD8	RANBP2-like and GRIP domain containing 8	1.59468	3.02027	0.0380655	0.0813144	up	9.07128	25.2605	0	11.3451
ADAMTS19	ADAM metallopeptidase with thrombospondin type 1 motif, 19	1.58416	2.99834	0.000138833	0.000590647	up	1.54853	1.50148	0.520958	0.487713
FLRT3	fibronectin leucine rich transmembrane protein 3	1.57884	2.9873	1.83104e-17	3.64593e-16	up	12.4656	9.9572	3.31519	4.16773
SPON1	spondin 1, extracellular matrix protein	1.57704	2.98357	4.66708e-111	1.96702e-108	up	95.7764	93.171	32.5836	30.7703
GNA14	guanine nucleotide binding protein (G protein), alpha 14	1.57048	2.97003	7.53611e-05	0.000338376	up	2.16794	1.65953	0.473598	0.798076
RAI2	retinoic acid induced 2	1.56175	2.95211	1.06059e-16	1.99555e-15	up	9.29117	9.40402	3.31519	3.01495
HLF	hepatic leukemia factor	1.55349	2.93527	1.8058e-20	4.37405e-19	up	12.0011	12.6441	4.40446	3.99038
DLX3	distal-less homeobox 3	1.5526	2.93346	4.4088e-09	4.0249e-08	up	4.18102	4.58347	1.51551	1.46314
C5AR2	complement component 5a receptor 2	1.55062	2.92942	1.67169e-10	1.81745e-09	up	5.03272	6.00593	1.94175	1.81784
ATP8B4	ATPase, class I, type 8B, member 4	1.53746	2.90282	4.87198e-10	5.03278e-09	up	6.96837	4.74152	1.94175	2.08386
GFRA1	GDNF family receptor alpha 1	1.53108	2.89003	1.05261e-17	2.12606e-16	up	10.4526	10.3523	3.55199	3.63568
RSPO3	R-spondin 3	1.52956	2.88698	3.33575e-08	2.69331e-07	up	4.64558	3.71419	1.61023	1.28579
PIK3IP1	phosphoinositide-3-kinase interacting protein 1	1.52905	2.88597	6.02674e-06	3.38807e-05	up	2.6325	2.68686	1.04192	0.798076
SLC7A7	solute carrier family 7 (amino acid transporter light chain, y+L system), member 7	1.52709	2.88204	0.000151232	0.000636121	up	2.32279	1.26441	0.710397	0.53205
TXNIP	thioredoxin interacting protein	1.52596	2.87978	1.70193e-161	1.43461e-158	up	396.501	358.064	131.329	130.707
ZFHX2	zinc finger homeobox 2	1.52581	2.87948	1.91632e-05	9.72697e-05	up	2.09051	2.29174	0.805117	0.709401
BDNF	brain-derived neurotrophic factor	1.52368	2.87523	4.19204e-58	5.14603e-56	up	44.5976	39.9869	15.2972	14.1437
GPR135	G protein-coupled receptor 135	1.51082	2.84972	0.00211431	0.00672706	up	1.00654	1.10636	0.236799	0.487713
GDPD3	glycerophosphodiester phosphodiesterase domain containing 3	1.51067	2.84943	0.000959632	0.00334166	up	1.39367	1.10636	0.284159	0.576388
PTGDS	prostaglandin D2 synthase 21kDa (brain)	1.50448	2.83722	3.23237e-11	3.77031e-10	up	6.34896	6.00593	1.89439	2.43856
CADM3	cell adhesion molecule 3	1.50434	2.83695	6.0897e-16	1.09841e-14	up	11.3817	9.40402	3.36255	3.94604
ITGA7	integrin, alpha 7	1.49992	2.82828	1.22655e-33	6.46185e-32	up	26.4024	22.2852	8.28797	8.91185
GREM2	gremlin 2, DAN family BMP antagonist	1.49917	2.8268	1.09024e-11	1.34413e-10	up	6.58124	6.40106	2.51007	2.08386
MEDAG	mesenteric estrogen-dependent adipogenesis	1.49636	2.8213	4.07501e-104	1.51542e-101	up	98.5638	96.7271	34.9515	34.2729
IGIP	IgA-inducing protein	1.49514	2.81891	2.44039e-16	4.48493e-15	up	11.2268	9.56207	3.45727	3.9017
IFIT1	interferon-induced protein with tetratricopeptide repeats 1	1.49213	2.81304	2.95912e-08	2.40611e-07	up	14.711	6.08496	3.03103	4.34508
TIMP3	TIMP metallopeptidase inhibitor 3	1.4916	2.812	8.95535e-94	2.35899e-91	up	123.495	111.821	44.4235	39.3274
CLK1	CDC-like kinase 1	1.48866	2.80629	3.31477e-50	3.19939e-48	up	33.9128	32.1633	11.7452	11.7938
ARRDC4	arrestin domain containing 4	1.48269	2.79469	3.78602e-102	1.32974e-99	up	104.835	105.657	39.4034	35.9577
PRLR	prolactin receptor	1.47893	2.78742	2.91966e-08	2.38015e-07	up	6.34896	4.10932	1.51551	2.21688
PIK3C2B	phosphatidylinositol-4-phosphate 3-kinase, catalytic subunit type 2 beta	1.47575	2.78129	0.000680324	0.00245002	up	1.08397	2.13369	0.568318	0.576388
SOX9	SRY (sex determining region Y)-box 9	1.46971	2.76967	3.37071e-23	9.86558e-22	up	18.5049	15.489	5.96734	6.29593
CAP2	CAP, adenylate cyclase-associated protein, 2 (yeast)	1.46652	2.76354	3.73973e-11	4.33411e-10	up	7.12323	5.92691	2.27327	2.43856
CHST15	carbohydrate (N-acetylgalactosamine 4-sulfate 6-O) sulfotransferase 15	1.46623	2.76298	9.06746e-39	5.90974e-37	up	28.9575	25.9994	10.4192	9.48823
TNXB	tenascin XB	1.46435	2.75939	2.29647e-19	5.2037e-18	up	18.4275	27.7379	7.0102	9.66558
OLFML2B	olfactomedin-like 2B	1.46068	2.75237	2.28263e-77	4.65509e-75	up	71.2323	64.9589	23.822	25.6271
SMAD6	SMAD family member 6	1.4598	2.75071	4.39839e-26	1.55779e-24	up	17.4984	19.6773	6.34622	7.13834
TMEM38A	transmembrane protein 38A	1.4559	2.74328	0.00413688	0.0121164	up	1.00654	1.02733	0.284159	0.443375
MCOLN2	mucolipin 2	1.4533	2.73834	0.000335192	0.00130085	up	2.01309	1.65953	0.994556	0.3547
ANK1	ankyrin 1, erythrocytic	1.44972	2.73155	5.62934e-58	6.84397e-56	up	43.5911	48.5216	16.6707	17.0256
CCND1	cyclin D1	1.44858	2.72939	5.2832e-184	5.13852e-181	up	600.132	600.119	227.09	212.732
GAS6-AS2	GAS6 antisense RNA 2 (head to head)	1.44238	2.71769	6.6775e-08	5.14505e-07	up	4.33588	4.26737	1.37343	1.7735
CHI3L2	chitinase 3-like 2	1.43911	2.71154	8.02795e-87	1.95203e-84	up	102.745	101.39	34.7147	40.4802
PLAU	plasminogen activator, urokinase	1.43846	2.71031	8.16708e-128	4.48976e-125	up	182.726	184.129	64.5988	70.674
CABLES1	Cdk5 and Abl enzyme substrate 1	1.43288	2.69986	8.85308e-22	2.38675e-20	up	15.5627	14.8568	5.3043	5.94123
HSPB6	heat shock protein, alpha-crystallin-related, B6	1.43183	2.69789	8.41818e-102	2.87674e-99	up	171.887	163.504	57.3527	66.861
PPP1R3C	protein phosphatase 1, regulatory subunit 3C	1.42308	2.68157	1.15252e-170	1.04089e-167	up	327.901	324.32	123.136	120.11
TEC	tec protein tyrosine kinase	1.4209	2.67752	0.00387206	0.0114415	up	1.08397	1.02733	0.520958	0.266025
ZFP36	ZFP36 ring finger protein	1.41801	2.67217	1.8649e-56	2.16328e-54	up	41.1908	42.1996	15.9129	15.2965
IL26	interleukin 26	1.41375	2.66428	3.19645e-12	4.20124e-11	up	8.90403	7.34936	3.22047	2.88194
GUCY1A3	guanylate cyclase 1, soluble, alpha 3	1.40524	2.64863	7.90676e-06	4.34099e-05	up	3.32933	2.76589	1.37343	0.931088
HAS1	hyaluronan synthase 1	1.39535	2.63052	2.22952e-12	2.97992e-11	up	7.66521	7.90254	2.98367	2.92628
IGFBP1	insulin-like growth factor binding protein 1	1.39494	2.62978	8.64451e-11	9.67267e-10	up	8.05234	6.55911	3.17311	2.39423
RAB43	RAB43, member RAS oncogene family	1.39394	2.62795	2.95878e-09	2.76912e-08	up	5.09543	7.2245	2.34857	2.32639
IGFBP3	insulin-like growth factor binding protein 3	1.39224	2.62486	7.6768e-186	8.08878e-183	up	864.388	857.11	333.461	322.423
GCNT2	glucosaminyl (N-acetyl) transferase 2, I-branching enzyme (I blood group)	1.38885	2.6187	8.6378e-06	4.70557e-05	up	3.71647	2.52881	1.04192	1.33013
C4orf48	chromosome 4 open reading frame 48	1.38479	2.61135	0.00137667	0.00458674	up	1.1614	1.73856	0.615678	0.487713
RASD1	RAS, dexamethasone-induced 1	1.38465	2.61108	5.14912e-32	2.49446e-30	up	48.6238	35.8775	14.7289	17.602
ANKRD33B	ankyrin repeat domain 33B	1.3809	2.60431	1.9887e-32	9.86083e-31	up	23.5376	26.9477	9.51932	9.84293
ST8SIA1	ST8 alpha-N-acetyl-neuraminide alpha-2,8-sialyltransferase 1	1.37808	2.59922	4.86917e-18	1.00434e-16	up	13.3173	13.2763	5.5411	4.69978
TGM2	transglutaminase 2	1.37672	2.59677	1.43438e-74	2.66711e-72	up	81.2977	80.6059	28.7001	33.5635
DUSP4	dual specificity phosphatase 4	1.37025	2.58516	1.85693e-106	7.33719e-104	up	150.827	142.799	57.9684	55.6436
NTN4	netrin 4	1.36559	2.57682	4.48727e-44	3.4808e-42	up	33.9128	32.3214	13.1187	12.5919
CHRDL1	chordin-like 1	1.3612	2.56899	1.40152e-81	3.16443e-79	up	72.7034	72.6244	28.2738	28.2874
ABCA6	ATP-binding cassette, sub-family A (ABC1), member 6	1.35137	2.55154	2.06546e-37	1.24956e-35	up	27.7186	29.7926	10.9401	11.5721
ICAM2	intercellular adhesion molecule 2	1.34582	2.54174	0.00345531	0.0103479	up	1.23882	1.34343	0.426238	0.576388
PIK3R3	phosphoinositide-3-kinase, regulatory subunit 3 (gamma)	1.34128	2.53376	1.57036e-21	4.1366e-20	up	18.9695	16.2002	6.96189	6.91666
RBP4	retinol binding protein 4, plasma	1.34052	2.53243	4.06827e-138	2.44949e-135	up	273.16	284.333	107.412	112.662
HEPHL1	hephaestin-like 1	1.33902	2.52979	0.000260233	0.00103341	up	3.63904	1.58051	0.947196	1.10844
HAS3	hyaluronan synthase 3	1.33859	2.52904	7.37761e-05	0.000331612	up	2.09051	2.92394	1.13664	0.842413
APOE	apolipoprotein E	1.33491	2.52259	1.10319e-101	3.67073e-99	up	141.768	145.407	55.0321	58.7472
CCAT1	colon cancer associated transcript 1 (non-protein coding)	1.33222	2.51789	1.1356e-06	7.27011e-06	up	4.64558	3.55614	1.61023	1.64049
CACNA1G	calcium channel, voltage-dependent, T type, alpha 1G subunit	1.32127	2.49886	0.000382145	0.00145845	up	2.6325	1.73856	1.04192	0.709401
AKR1C2	aldo-keto reductase family 1, member C2	1.31244	2.48362	9.94312e-91	2.51442e-88	up	131.959	124.63	50.2492	53.0277
SPON2	spondin 2, extracellular matrix protein	1.31158	2.48213	2.68911e-32	1.32561e-30	up	29.6543	26.2364	10.5612	11.9268
ISG15	ISG15 ubiquitin-like modifier	1.30428	2.4696	2.72717e-06	1.63346e-05	up	6.81352	3.79322	1.70495	2.57158
LOC729737		1.30411	2.46931	0.000339905	0.0013155	up	2.27866	1.95509	1.07507	0.642894
JUP	junction plakoglobin	1.30199	2.46569	6.60219e-10	6.73211e-09	up	6.81352	7.19131	2.41535	3.23664
VAV3	vav 3 guanine nucleotide exchange factor	1.301	2.46399	5.58087e-05	0.000257911	up	2.70992	2.60784	0.899837	1.24145
CPEB3	cytoplasmic polyadenylation element binding protein 3	1.29688	2.45696	0.000423522	0.00159613	up	1.85823	2.21271	0.710397	0.931088
SEPP1	selenoprotein P, plasma, 1	1.28803	2.44195	6.6369e-49	6.17036e-47	up	79.7492	64.0896	28.7474	30.1495
CYP26B1	cytochrome P450, family 26, subfamily B, polypeptide 1	1.2835	2.43429	3.48449e-10	3.66234e-09	up	7.27808	8.21864	2.69951	3.63568
CPNE7	copine VII	1.28322	2.43382	3.55861e-14	5.53445e-13	up	11.3043	10.6684	4.45182	4.56677
TNFSF15	tumor necrosis factor (ligand) superfamily, member 15	1.28143	2.4308	1.28184e-22	3.65035e-21	up	20.518	18.0178	8.09853	7.75907
SPTBN4	spectrin, beta, non-erythrocytic 4	1.281	2.43007	0.00557709	0.015765	up	1.23882	1.34343	0.568318	0.487713
CACNA2D3	calcium channel, voltage-dependent, alpha 2/delta subunit 3	1.27994	2.42828	3.7081e-05	0.00017741	up	3.40676	2.60784	1.08928	1.37446
KLF2	Kruppel-like factor 2	1.27841	2.42572	3.98714e-07	2.75483e-06	up	4.33588	5.45275	1.70495	2.30555
KIAA1671	KIAA1671	1.27831	2.42555	2.41958e-23	7.13128e-22	up	19.0469	21.732	7.95645	8.82317
FBXO2	F-box protein 2	1.27562	2.42104	0.00188782	0.00605982	up	1.85823	1.26441	0.710397	0.576388
ENTPD3	ectonucleoside triphosphate diphosphohydrolase 3	1.27535	2.42058	0.00531499	0.0151119	up	1.23882	1.10636	0.378879	0.576388
AKAP6	A kinase (PRKA) anchor protein 6	1.27445	2.41907	9.27867e-12	1.15132e-10	up	10.53	11.1426	3.50463	5.40918
C1QTNF5	C1q and tumor necrosis factor related protein 5	1.27393	2.4182	0.000861244	0.00302572	up	2.01309	1.65953	0.757757	0.753738
ITGA9	integrin, alpha 9	1.27246	2.41573	0.00264758	0.00819886	up	1.23882	1.65953	0.520958	0.665063
TMEM171	transmembrane protein 171	1.25634	2.38889	2.04502e-05	0.000103181	up	3.17448	3.08199	1.32607	1.28579
CMTM8	CKLF-like MARVEL transmembrane domain containing 8	1.25462	2.38604	1.1365e-06	7.27222e-06	up	4.25845	4.74152	2.22591	1.55181
PRELP	proline/arginine-rich end leucine-rich repeat protein	1.25122	2.38042	4.71211e-07	3.21186e-06	up	6.19411	4.58347	1.79967	2.70459
EGFL7	EGF-like-domain, multiple 7	1.2481	2.37529	0.000194144	0.000792368	up	2.32279	2.37076	0.852477	1.10844
PF4V1	platelet factor 4 variant 1	1.24445	2.36929	7.04835e-16	1.2641e-14	up	13.7045	17.7017	6.72509	6.51762
TPD52L1	tumor protein D52-like 1	1.24107	2.36373	4.23165e-07	2.9158e-06	up	4.4133	5.13665	1.98911	2.03953
GMPR	guanosine monophosphate reductase	1.23077	2.34692	3.90816e-05	0.00018626	up	2.86478	3.39809	1.46815	1.19711
MMP3	matrix metallopeptidase 3	1.23008	2.34579	2.14415e-56	2.46461e-54	up	369.092	285.835	139.238	139.974
CACNB4	calcium channel, voltage-dependent, beta 4 subunit	1.22554	2.33842	0.00227537	0.00717631	up	2.47764	1.26441	0.426238	1.15278
LOC100506023		1.21912	2.32804	0.00499258	0.0143403	up	1.00654	1.89661	0.568318	0.665063
THY1	Thy-1 cell surface antigen	1.21891	2.32771	1.07747e-71	1.89216e-69	up	126.128	128.416	50.8171	58.4369
CXCL6	chemokine (C-X-C motif) ligand 6	1.21793	2.32612	1.18731e-117	6.00492e-115	up	2960.48	2735.78	1258.97	1189.93
CXCL16	chemokine (C-X-C motif) ligand 16	1.21723	2.325	5.34678e-31	2.44944e-29	up	32.6739	28.9233	14.1132	12.4145
STAT1	signal transducer and activator of transcription 1, 91kDa	1.20981	2.31307	6.96775e-123	3.67084e-120	up	457.9	431.953	189.013	195.662
TGFBR2	transforming growth factor, beta receptor II (70/80kDa)	1.20907	2.31189	2.15457e-138	1.36212e-135	up	976.579	1019.82	435.237	428.301
HSD11B1	hydroxysteroid (11-beta) dehydrogenase 1	1.20814	2.31039	1.34417e-09	1.32057e-08	up	12.6979	8.21864	4.07294	4.9658
COL14A1	collagen, type XIV, alpha 1	1.20722	2.30893	2.70334e-99	8.33684e-97	up	242.267	229.648	98.1295	106.188
ARHGAP20	Rho GTPase activating protein 20	1.20687	2.30837	4.94466e-21	1.25041e-19	up	18.7372	22.2061	8.71421	9.00052
ST6GALNAC4	ST6 (alpha-N-acetyl-neuraminyl-2,3-beta-galactosyl-1,3)-N-acetylgalactosaminide alpha-2,6-sialyltransferase 4	1.20684	2.30831	1.24696e-32	6.20732e-31	up	30.506	34.297	13.3081	14.7201
PLCG2	phospholipase C, gamma 2 (phosphatidylinositol-specific)	1.19891	2.29566	0.00327773	0.0098958	up	1.62595	1.65953	0.947196	0.487713
HMGCLL1	3-hydroxymethyl-3-methylglutaryl-CoA lyase-like 1	1.19765	2.29366	3.23274e-06	1.90736e-05	up	3.79389	5.05763	1.94175	1.90651
FAM131B	family with sequence similarity 131, member B	1.19601	2.29105	7.18266e-15	1.19183e-13	up	13.8593	13.0392	6.29886	5.45352
KCNS2	potassium voltage-gated channel, modifier subfamily S, member 2	1.19591	2.2909	3.6375e-13	5.2443e-12	up	12.0011	10.9845	4.92542	5.09882
FAM20A	family with sequence similarity 20, member A	1.19578	2.29068	4.73568e-35	2.60339e-33	up	34.687	31.9263	14.3974	14.6757
GJA3	gap junction protein, alpha 3, 46kDa	1.18846	2.2791	0.000143716	0.00060835	up	2.86478	2.68686	1.27872	1.15278
SERF1B	small EDRK-rich factor 1B (centromeric)	1.18454	2.27291	0.000305254	0.00119198	up	3.46019	10.5104	3.88398	2.26254
CHL1	cell adhesion molecule L1-like	1.17629	2.25995	1.11235e-23	3.33283e-22	up	24.6216	22.5222	11.2243	9.66558
C7	complement component 7	1.17463	2.25735	0.00430134	0.0125458	up	3.01963	1.02733	1.04192	0.753738
HHEX	hematopoietically expressed homeobox	1.16689	2.24527	0.00482299	0.0139006	up	1.78081	1.10636	0.473598	0.798076
XG	Xg blood group	1.16679	2.24512	3.60986e-06	2.11998e-05	up	4.25845	4.82055	2.22591	1.81784
SLPI	secretory leukocyte peptidase inhibitor	1.16382	2.24051	0.00749073	0.0203752	up	1.08397	1.81758	0.805117	0.487713
FZD8	frizzled class receptor 8	1.16033	2.23509	1.7363e-08	1.47738e-07	up	6.58124	7.27034	3.31519	2.88194
ARHGAP39	Rho GTPase activating protein 39	1.16018	2.23486	0.00102041	0.00351996	up	3.25191	1.65953	0.899837	1.28579
CEBPA	CCAAT/enhancer binding protein (C/EBP), alpha	1.15984	2.23432	4.30445e-24	1.34384e-22	up	28.4929	25.0511	10.7507	13.1682
AQP1	aquaporin 1 (Colton blood group)	1.15498	2.22682	8.95924e-06	4.85974e-05	up	5.88441	3.71419	2.27327	2.03953
AGMO	alkylglycerol monooxygenase	1.15419	2.22559	1.85349e-11	2.22983e-10	up	10.3751	10.0362	4.78334	4.38942
APOD	apolipoprotein D	1.1529	2.2236	6.68143e-07	4.4604e-06	up	5.96183	4.74152	2.41535	2.39423
ANKRD34A	ankyrin repeat domain 34A	1.1507	2.22021	7.38665e-07	4.90787e-06	up	4.87786	6.32203	2.27327	2.74893
SCUBE3	signal peptide, CUB domain, EGF-like 3	1.15047	2.21986	2.65707e-114	1.29216e-111	up	383.88	397.893	172.674	179.434
FJX1	four jointed box 1	1.14953	2.21841	1.14135e-63	1.55175e-61	up	92.9117	92.7758	42.4344	41.2783
KCNH1	potassium channel, voltage gated eag related subfamily H, member 1	1.14762	2.21549	0.000684872	0.00246359	up	2.32279	2.05466	0.947196	1.01976
OLAH	oleoyl-ACP hydrolase	1.14542	2.2121	5.38038e-11	6.10678e-10	up	9.83315	10.9845	5.16222	4.2564
IL12A	interleukin 12A	1.1439	2.20978	0.0137238	0.0341851	up	1.00654	1.34343	0.615678	0.443375
PRR7	proline rich 7 (synaptic)	1.14297	2.20835	3.7521e-08	3.00139e-07	up	6.81352	7.90254	3.83615	2.8376
RAP1GAP2	RAP1 GTPase activating protein 2	1.14006	2.2039	1.05826e-08	9.20893e-08	up	7.97492	6.87521	3.40991	3.32532
NAALADL2	N-acetylated alpha-linked acidic dipeptidase-like 2	1.13778	2.20042	7.5752e-20	1.77935e-18	up	24.5442	21.732	9.18781	11.7938
SLC7A8	solute carrier family 7 (amino acid transporter light chain, L system), member 8	1.13459	2.19557	1.46826e-37	9.05592e-36	up	59.1538	49.2328	24.8639	24.5187
HMCN1	hemicentin 1	1.13415	2.19489	1.40509e-33	7.34133e-32	up	43.9008	39.4337	17.5231	20.3953
DUSP6	dual specificity phosphatase 6	1.1306	2.1895	1.01724e-61	1.31245e-59	up	110.875	103.76	50.7697	47.3082
GRB14	growth factor receptor-bound protein 14	1.13046	2.18928	3.68891e-05	0.000176878	up	3.32933	4.82055	1.89439	1.81784
ANKRD9	ankyrin repeat domain 9	1.12713	2.18423	0.0014339	0.0047449	up	2.16794	2.37076	1.46815	0.620726
FILIP1	filamin A interacting protein 1	1.12036	2.17402	2.26318e-05	0.00011306	up	4.1036	3.87225	1.70495	1.95085
TGFB2	transforming growth factor, beta 2	1.11689	2.16878	4.10205e-12	5.32509e-11	up	13.2399	11.3797	5.3043	6.02991
NAPEPLD	N-acyl phosphatidylethanolamine phospholipase D	1.11428	2.16487	3.02894e-18	6.37236e-17	up	21.9891	19.5193	10.6086	8.60148
LOC100379224		1.11418	2.16472	2.31895e-05	0.000115573	up	4.02617	4.0303	2.08383	1.64049
CLVS2	clavesin 2	1.10966	2.15795	2.69584e-08	2.21483e-07	up	7.27808	8.13962	3.12575	3.99038
QPCT	glutaminyl-peptide cyclotransferase	1.10798	2.15544	3.34476e-39	2.23763e-37	up	53.0371	47.1782	23.7273	22.7895
STAB1	stabilin 1	1.10785	2.15525	0.011192	0.0287264	up	1.54853	1.02733	0.473598	0.709401
MPV17L	MPV17 mitochondrial membrane protein-like	1.10543	2.15163	1.11627e-05	5.94027e-05	up	4.72301	3.95127	1.79967	2.21688
FBLN2	fibulin 2	1.10237	2.14708	1.40718e-29	5.9706e-28	up	31.2028	32.0053	13.8764	15.5181
CDKN2B	cyclin-dependent kinase inhibitor 2B (p15, inhibits CDK4)	1.09902	2.14209	2.63095e-10	2.80487e-09	up	9.60087	11.6958	4.5939	5.3205
ADAMTS5	ADAM metallopeptidase with thrombospondin type 1 motif, 5	1.09889	2.14191	4.40686e-70	7.0532e-68	up	173.822	173.856	86.1949	76.2162
KANK1	KN motif and ankyrin repeat domains 1	1.09839	2.14116	7.57273e-50	7.19922e-48	up	65.6576	71.597	32.3468	31.7457
DKK1	dickkopf WNT signaling pathway inhibitor 1	1.09823	2.14091	3.03232e-17	5.95351e-16	up	17.4984	18.729	8.90365	8.02509
BOC	BOC cell adhesion associated, oncogene regulated	1.08649	2.12356	1.53023e-24	4.92321e-23	up	29.1123	26.4735	12.2188	13.922
ISM1	isthmin 1, angiogenesis inhibitor	1.0832	2.11872	2.09696e-05	0.000105507	up	6.89095	4.42542	2.03647	3.28098
KAZALD1	Kazal-type serine peptidase inhibitor domain 1	1.07902	2.1126	2.31441e-12	3.08686e-11	up	12.6979	15.8841	6.86717	6.65063
KYNU	kynureninase	1.07482	2.10646	2.45082e-95	6.73657e-93	up	329.449	321.95	150.178	158.994
PBLD	phenazine biosynthesis-like protein domain containing	1.0741	2.1054	2.95029e-06	1.75628e-05	up	5.18757	5.45275	2.88895	2.17254
C7orf43	chromosome 7 open reading frame 43	1.06903	2.09803	3.60191e-05	0.000173363	up	3.63904	4.74152	1.94175	2.03953
TNFRSF21	tumor necrosis factor receptor superfamily, member 21	1.06754	2.09586	1.14234e-37	7.08026e-36	up	47.1527	44.7284	22.2591	21.5924
FMNL1	formin-like 1	1.06302	2.08929	0.000596594	0.00217952	up	2.9422	2.52881	1.42079	1.19711
FAM78A	family with sequence similarity 78, member A	1.06051	2.08567	0.0110422	0.0283775	up	1.31625	1.65953	0.568318	0.842413
ABCA7	ATP-binding cassette, sub-family A (ABC1), member 7	1.06018	2.08519	0.00016955	0.000704254	up	3.25191	3.63517	1.46815	1.81784
PPM1H	protein phosphatase, Mg2+/Mn2+ dependent, 1H	1.05979	2.08463	0.00392787	0.0115929	up	1.62595	2.60784	1.27872	0.753738
LRRC32	leucine rich repeat containing 32	1.05443	2.07689	6.02606e-29	2.4421e-27	up	34.687	34.6131	15.5814	17.735
MAFB	v-maf avian musculoaponeurotic fibrosarcoma oncogene homolog B	1.04875	2.06874	6.20435e-24	1.90407e-22	up	36.313	29.7926	15.8182	16.1389
ZNF219	zinc finger protein 219	1.04704	2.06628	5.40694e-07	3.64421e-06	up	6.96837	9.9572	3.40991	4.74412
BRI3BP	BRI3 binding protein	1.04359	2.06136	0.000439152	0.00164864	up	3.09706	3.16102	1.79967	1.24145
AKR1C3	aldo-keto reductase family 1, member C3	1.04077	2.05733	6.7064e-38	4.21869e-36	up	53.1339	61.2842	27.9186	27.6746
APOL1	apolipoprotein L, 1	1.03643	2.05115	0.000187038	0.000765838	up	3.71647	3.24004	1.51551	1.86218
SCN8A	sodium channel, voltage gated, type VIII alpha subunit	1.03556	2.04992	2.37364e-12	3.15826e-11	up	13.3948	14.3036	6.39358	7.09401
CFD	complement factor D (adipsin)	1.03435	2.04819	1.18438e-05	6.26582e-05	up	4.4133	5.45275	2.27327	2.52724
CDKN1A	cyclin-dependent kinase inhibitor 1A (p21, Cip1)	1.03257	2.04566	1.09195e-81	2.51029e-79	up	341.063	367.468	168.838	177.439
TP53INP1	tumor protein p53 inducible nuclear protein 1	1.02932	2.04106	7.55938e-26	2.64035e-24	up	30.7383	32.2424	16.3391	14.5427
ACSL4	acyl-CoA synthetase long-chain family member 4	1.02793	2.0391	5.2489e-70	8.29589e-68	up	964.268	847.864	457.591	431.183
PRDM11	PR domain containing 11	1.02772	2.0388	0.00919051	0.0243005	up	1.78081	1.50148	0.852477	0.753738
ENPP2	ectonucleotide pyrophosphatase/phosphodiesterase 2	1.02745	2.03842	4.75906e-97	1.33719e-94	up	536.875	514.06	261.331	254.276
IRF7	interferon regulatory factor 7	1.02424	2.03388	0.00426414	0.0124517	up	1.85823	1.97564	0.899837	0.975426
OSR2	odd-skipped related transciption factor 2	1.02359	2.03298	2.91719e-18	6.14748e-17	up	20.3631	21.0998	10.4192	9.97595
PRKG1	protein kinase, cGMP-dependent, type I	1.02332	2.03259	9.35453e-13	1.29329e-11	up	14.4787	14.3036	7.15133	7.00533
SLC19A3	solute carrier family 19 (thiamine transporter), member 3	1.02324	2.03248	2.5365e-38	1.628e-36	up	49.7852	50.7343	24.1061	25.3167
P2RX5	purinergic receptor P2X, ligand gated ion channel, 5	1.02089	2.02918	0.00167819	0.00546038	up	2.16794	3.2195	1.35496	1.29067
BRINP2	bone morphogenetic protein/retinoic acid inducible neural-specific 2	1.02049	2.02861	0.0137768	0.0342766	up	1.23882	1.65953	0.710397	0.709401
NPDC1	neural proliferation, differentiation and control, 1	1.01935	2.02701	1.0597e-16	1.99555e-15	up	19.5889	20.3095	9.04573	10.5967
SLC19A2	solute carrier family 19 (thiamine transporter), member 2	1.01516	2.02113	1.27594e-16	2.38653e-15	up	34.9193	24.972	15.1551	14.4984
LINC01123	long intergenic non-protein coding RNA 1123	1.01485	2.0207	0.000996402	0.00344787	up	2.55043	2.67738	1.42648	1.15943
LRP1	low density lipoprotein receptor-related protein 1	1.01398	2.01947	1.67872e-34	9.07083e-33	up	482.134	509.319	209.52	281.277
ABCC6	ATP-binding cassette, sub-family C (CFTR/MRP), member 6	1.01306	2.01819	0.000180168	0.00074131	up	3.57168	3.62015	1.5965	1.9513
CACHD1	cache domain containing 1	1.00764	2.01062	6.79224e-22	1.83899e-20	up	29.6543	26.5525	14.7289	13.2569
HSPB8	heat shock 22kDa protein 8	1.00733	2.01019	1.23399e-06	7.83258e-06	up	9.36859	6.87521	4.68862	3.41399
STEAP2	STEAP family member 2, metalloreductase	1.0068	2.00945	2.7857e-49	2.62854e-47	up	101.971	97.0432	51.2907	47.7959
GFOD1	glucose-fructose oxidoreductase domain containing 1	1.00655	2.0091	0.0117845	0.0299987	up	1.39367	1.65953	0.757757	0.753738
LINC01133	long intergenic non-protein coding RNA 1133	1.00466	2.00647	0.00389462	0.0115055	up	2.01309	2.13369	0.899837	1.15278
SPOCK1	sparc/osteonectin, cwcv and kazal-like domains proteoglycan (testican) 1	1.00443	2.00615	3.77547e-95	1.01568e-92	up	411.676	409.826	205.589	203.908
LTBP3	latent transforming growth factor beta binding protein 3	1.00393	2.00546	2.01987e-41	1.47626e-39	up	76.7295	84.5572	38.4562	41.899
NEK10	NIMA-related kinase 10	1.00366	2.00509	0.00373783	0.0110838	up	2.01309	2.13369	0.994556	1.0641
ZNF503-AS2	ZNF503 antisense RNA 2	1.00278	2.00386	0.0156394	0.038219	up	1.23882	1.34343	0.520958	0.753738
MFGE8	milk fat globule-EGF factor 8 protein	1.00248	2.00344	6.84567e-41	4.80871e-39	up	77.6587	75.4693	35.5199	40.8349
CPZ	carboxypeptidase Z	1.00217	2.00301	0.0105414	0.0273156	up	1.39367	2.21271	1.13664	0.665063
NAALADL1	N-acetylated alpha-linked acidic dipeptidase-like 1	-1.00002	0.499991	0.0055403	0.015675	down	1.08397	1.18538	2.84159	1.72916
LOC645513		-1.00108	0.499625	0.0146778	0.036212	down	0.619411	0.86928	1.42079	1.56556
SLMO2-ATP5E		-1.00306	0.49894	4.76097e-09	4.34327e-08	down	4.5519	5.56339	10.3368	9.94181
HIST2H3D	histone cluster 2, H3d	-1.00695	0.497596	2.58653e-12	3.42093e-11	down	7.19136	7.24347	13.9124	15.0916
CCDC152	coiled-coil domain containing 152	-1.00841	0.497093	2.80546e-09	2.63342e-08	down	4.64558	6.79619	11.7452	11.2617
HOMER2	homer scaffolding protein 2	-1.00981	0.496612	0.00878826	0.0233786	down	1.00654	0.711229	1.65759	1.81784
ZNF93	zinc finger protein 93	-1.01337	0.495387	0.000462413	0.00172623	down	1.70338	1.58051	3.50463	3.14797
HBEGF	heparin-binding EGF-like growth factor	-1.01524	0.494748	0.00100363	0.00346909	down	1.70338	1.18538	2.93631	2.92628
FAHD2B	fumarylacetoacetate hydrolase domain containing 2B	-1.01829	0.493701	2.47544e-06	1.49543e-05	down	3.56084	2.63787	5.91572	6.65728
BCYRN1	brain cytoplasmic RNA 1	-1.01927	0.493366	1.79033e-06	1.10532e-05	down	4.25845	2.58492	6.63037	7.27136
DMC1	DNA meiotic recombinase 1	-1.02063	0.4929	2.28485e-05	0.000113963	down	2.24537	2.68686	4.49918	5.49786
HIST1H2BL	histone cluster 1, H2bl	-1.02071	0.492874	1.15929e-20	2.84622e-19	down	13.7045	11.3006	25.2428	25.5384
GADD45B	growth arrest and DNA-damage-inducible, beta	-1.02181	0.492497	1.46112e-20	3.56648e-19	down	11.7688	12.0119	23.4905	24.7847
PAPPA2	pappalysin 2	-1.02192	0.492459	0.000348749	0.00134357	down	1.62595	1.65953	3.31519	3.36965
LOC285074	anaphase promoting complex subunit 1 pseudogene	-1.02256	0.492241	3.68056e-05	0.000176607	down	1.72583	3.77188	5.30904	5.83748
BANK1	B-cell scaffold protein with ankyrin repeats 1	-1.02326	0.492002	0.00845159	0.0226307	down	1.23882	0.553178	2.03647	1.64049
PTX3	pentraxin 3, long	-1.02459	0.491551	6.36186e-87	1.57724e-84	down	261.391	275.166	562.871	528.725
BIRC5	baculoviral IAP repeat containing 5	-1.02477	0.491489	3.43356e-41	2.45276e-39	down	30.6608	33.8229	66.7773	64.4224
PTGS2	prostaglandin-endoperoxide synthase 2 (prostaglandin G/H synthase and cyclooxygenase)	-1.0251	0.491377	3.67634e-26	1.3131e-24	down	36.7775	27.8169	71.2765	60.3434
H2AFY2	H2A histone family, member Y2	-1.02588	0.491109	1.39143e-12	1.89175e-11	down	7.27808	7.90254	16.7654	14.188
KIF15	kinesin family member 15	-1.0259	0.491104	7.84673e-25	2.59045e-23	down	15.4079	16.5163	34.1464	30.9033
GPSM3	G-protein signaling modulator 3	-1.02696	0.490743	0.0297934	0.0661821	down	0.619411	0.474152	1.23136	1.01976
HOXA13	homeobox A13	-1.03016	0.489655	0.00687819	0.0189225	down	0.85169	0.86928	1.89439	1.64049
CKAP2L	cytoskeleton associated protein 2-like	-1.03148	0.489208	1.08946e-30	4.9022e-29	down	25.7056	30.0297	61.5678	52.407
GOLGA8O	golgin A8 family, member O	-1.03154	0.489189	0.00136859	0.0045646	down	1.30309	1.36951	3.04003	2.44832
HHIP	hedgehog interacting protein	-1.03443	0.488208	1.74774e-07	1.27295e-06	down	4.02617	3.31907	7.67229	7.40437
TOX	thymocyte selection-associated high mobility group box	-1.03625	0.487592	0.00108912	0.003737	down	1.00654	1.73856	2.79423	2.8376
TRPA1	transient receptor potential cation channel, subfamily A, member 1	-1.03636	0.487555	0.000290864	0.00114265	down	2.16794	1.58051	3.07839	4.6111
HIST1H2BF	histone cluster 1, H2bf	-1.03743	0.487193	6.58886e-27	2.44309e-25	down	15.6401	18.808	35.1097	35.5587
LINC01004	long intergenic non-protein coding RNA 1004	-1.03767	0.487114	8.29604e-06	4.53699e-05	down	2.47764	2.68686	4.92542	5.67521
FER1L4	fer-1-like family member 4, pseudogene (functional)	-1.04005	0.486311	0.00278365	0.00857254	down	1.1614	1.18538	1.94175	2.88194
PMS2CL	PMS2 C-terminal like pseudogene	-1.04048	0.486166	1.41684e-05	7.3783e-05	down	2.84465	3.17129	7.47243	4.94452
ATP6V1G2	ATPase, H+ transporting, lysosomal 13kDa, V1 subunit G2	-1.04224	0.485573	0.00141559	0.00469614	down	1.31625	1.18538	2.36799	2.79327
LINC00936	long intergenic non-protein coding RNA 936	-1.04258	0.485458	0.00613866	0.0171568	down	1.62595	0.474152	2.46271	1.90651
AK5	adenylate kinase 5	-1.04273	0.485407	1.43144e-12	1.94405e-11	down	6.27154	7.58644	14.5868	13.9663
EIF3C	eukaryotic translation initiation factor 3, subunit C	-1.04395	0.484997	4.03046e-06	2.34736e-05	down	27.6908	10.493	48.738	30.0963
APOBEC3B	apolipoprotein B mRNA editing enzyme, catalytic polypeptide-like 3B	-1.04533	0.484534	7.49925e-15	1.24273e-13	down	7.63269	8.22734	16.2875	16.4479
FAM64A	family with sequence similarity 64, member A	-1.04917	0.483247	2.17307e-09	2.069e-08	down	4.72301	4.58347	9.47196	9.7986
NFKBIZ	nuclear factor of kappa light polypeptide gene enhancer in B-cells inhibitor, zeta	-1.05073	0.482723	1.05721e-66	1.48526e-64	down	70.5354	69.879	147.905	143.033
NEK2	NIMA-related kinase 2	-1.05363	0.481754	9.22409e-22	2.47621e-20	down	11.5365	11.5377	24.1535	23.7649
CHRNB1	cholinergic receptor, nicotinic, beta 1 (muscle)	-1.05504	0.481284	0.00528843	0.0150499	down	0.85169	0.948305	1.79967	1.95085
RNF144A	ring finger protein 144A	-1.05759	0.480435	5.51959e-24	1.70219e-22	down	13.3173	12.407	26.4741	27.0902
EPOR	erythropoietin receptor	-1.06019	0.479568	0.000496071	0.00184209	down	1.39367	1.50148	3.22047	2.8376
RNF122	ring finger protein 122	-1.06355	0.478452	0.0149003	0.0366751	down	0.619411	0.711229	1.46815	1.33013
USP2	ubiquitin specific peptidase 2	-1.0676	0.477112	0.00890414	0.0236521	down	0.774264	0.790254	1.51551	1.7735
HIST1H2BH	histone cluster 1, H2bh	-1.06832	0.476874	1.61019e-45	1.33942e-43	down	29.422	31.136	64.1252	62.8706
HIST1H4A	histone cluster 1, H4a	-1.0701	0.476288	5.19016e-17	9.95818e-16	down	8.82661	8.6928	17.7599	19.0208
CENPU	centromere protein U	-1.07012	0.476279	3.58676e-15	6.08738e-14	down	7.66521	7.82352	16.7654	15.7842
NDC80	NDC80 kinetochore complex component	-1.07127	0.475899	8.7207e-33	4.39301e-31	down	19.976	24.3398	47.8808	45.2243
SLC7A11	solute carrier family 7 (anionic amino acid transporter light chain, xc- system), member 11	-1.07198	0.475665	2.60886e-19	5.86947e-18	down	10.53	9.325	21.1698	20.617
CDC42EP5	CDC42 effector protein (Rho GTPase binding) 5	-1.07769	0.473787	6.46167e-06	3.60872e-05	down	3.25191	1.97564	5.16222	5.89689
PENK	proenkephalin	-1.07777	0.47376	7.63212e-24	2.32532e-22	down	11.614	13.2763	26.0953	26.4252
CPA4	carboxypeptidase A4	-1.07878	0.473428	4.20993e-16	7.64805e-15	down	7.58779	9.0089	17.902	17.1586
WDR66	WD repeat domain 66	-1.08078	0.472774	7.32089e-06	4.05455e-05	down	2.6325	2.37076	6.0147	4.6111
CRIP1	cysteine-rich protein 1 (intestinal)	-1.08269	0.472149	0.0176438	0.0424202	down	0.387132	0.948305	1.184	1.64049
KIF2C	kinesin family member 2C	-1.08347	0.471892	1.42313e-31	6.71421e-30	down	18.8146	21.4159	44.8498	40.4358
HOXA3	homeobox A3	-1.08599	0.471069	0.0149871	0.0368385	down	0.541985	0.790254	1.42079	1.4188
DSG2	desmoglein 2	-1.08912	0.470047	1.94704e-18	4.17261e-17	down	10.6848	9.72013	19.9385	23.4546
SKA1	spindle and kinetochore associated complex subunit 1	-1.09061	0.469564	6.3252e-19	1.38367e-17	down	10.6848	9.0089	21.9276	20.0849
C3orf70	chromosome 3 open reading frame 70	-1.09128	0.469346	0.0156006	0.0381535	down	0.541985	0.790254	1.84703	1.01976
GOLGA8A	golgin A8 family, member A	-1.09232	0.469007	2.20105e-14	3.47442e-13	down	8.93578	9.31631	22.199	16.788
PRSS12	protease, serine, 12 (neurotrypsin, motopsin)	-1.09387	0.468501	1.00357e-10	1.11308e-09	down	4.56816	5.84788	11.5558	10.6853
HIST1H2AM	histone cluster 1, H2am	-1.0977	0.46726	5.89005e-35	3.22397e-33	down	21.2148	21.0998	42.8531	47.6629
SLFN13	schlafen family member 13	-1.09962	0.466639	0.00289566	0.00886937	down	0.959313	0.895358	1.9948	1.99741
PLBD1	phospholipase B domain containing 1	-1.09982	0.466575	0.000300739	0.00117765	down	1.23882	1.65953	2.84159	3.36965
ZNF502	zinc finger protein 502	-1.10108	0.466168	1.45411e-08	1.25073e-07	down	3.71647	3.95127	8.80893	7.67039
ETS1	v-ets avian erythroblastosis virus E26 oncogene homolog 1	-1.10629	0.464487	5.78302e-71	9.7494e-69	down	81.4526	72.8614	164.623	167.685
LINC00265	long intergenic non-protein coding RNA 265	-1.10959	0.463425	0.00441222	0.0128219	down	1.16759	0.565032	1.76699	1.99519
DLGAP5	discs, large (Drosophila) homolog-associated protein 5	-1.10961	0.463419	1.87214e-60	2.39104e-58	down	46.843	48.2055	103.813	101.311
LOC728392		-1.11016	0.463244	0.00837926	0.022456	down	0.464558	1.26441	1.27872	2.43856
C17orf107	chromosome 17 open reading frame 107	-1.11135	0.46286	0.0198839	0.0470545	down	0.619411	0.474152	1.23136	1.15278
SLC1A4	solute carrier family 1 (glutamate/neutral amino acid transporter), member 4	-1.11188	0.462692	1.41208e-09	1.37978e-08	down	3.71647	5.05763	9.37724	9.57691
HR	hair growth associated	-1.11189	0.462689	0.000653045	0.00236052	down	1.4711	1.10636	3.03103	2.57158
CYB5R2	cytochrome b5 reductase 2	-1.11384	0.462062	3.5924e-12	4.69724e-11	down	5.65213	5.92691	11.7926	13.2569
LOC100506990		-1.1173	0.460956	2.64434e-08	2.17418e-07	down	3.63904	3.47712	7.05661	8.3798
PTPRN2	protein tyrosine phosphatase, receptor type, N polypeptide 2	-1.11808	0.460707	0.0133887	0.0334956	down	0.541985	0.632203	1.23136	1.33013
ARHGEF25	Rho guanine nucleotide exchange factor (GEF) 25	-1.12115	0.459728	4.65762e-07	3.17814e-06	down	2.6325	2.68686	5.7779	5.80822
SCD	stearoyl-CoA desaturase (delta-9-desaturase)	-1.12214	0.459412	5.27861e-106	2.02251e-103	down	169.177	164.294	356.714	369.154
HIST1H2AE	histone cluster 1, H2ae	-1.12254	0.459285	1.01678e-45	8.51404e-44	down	31.1254	36.8258	76.0599	71.8712
HAPLN1	hyaluronan and proteoglycan link protein 1	-1.1229	0.45917	1.0429e-05	5.59459e-05	down	2.01309	1.97564	4.45182	4.2564
VSTM4	V-set and transmembrane domain containing 4	-1.12312	0.459099	4.00753e-09	3.67716e-08	down	3.87132	3.87225	7.95645	8.91185
GAS2L3	growth arrest-specific 2 like 3	-1.12763	0.457668	1.75838e-26	6.42572e-25	down	13.0851	15.568	33.0572	29.5731
LINC00839	long intergenic non-protein coding RNA 839	-1.13225	0.456202	0.0207965	0.0487717	down	0.696837	0.316102	1.184	1.0641
TMED7-TICAM2	TMED7-TICAM2 readthrough	-1.13324	0.455892	9.66523e-15	1.58095e-13	down	6.58279	6.75272	13.9806	15.265
GSTM4	glutathione S-transferase mu 4	-1.13584	0.455071	3.08786e-08	2.49795e-07	down	3.09706	3.89358	7.00925	8.33546
HIST1H2AH	histone cluster 1, H2ah	-1.13686	0.454748	7.46865e-26	2.61589e-24	down	11.3043	12.328	25.5269	26.4252
H1F0	H1 histone family, member 0	-1.13688	0.454741	2.19586e-40	1.51718e-38	down	42.0425	32.2424	79.5645	83.8866
HIST1H3G	histone cluster 1, H3g	-1.13716	0.454654	2.03523e-37	1.23719e-35	down	19.1243	18.1758	41.1083	40.9679
IL6	interleukin 6	-1.1387	0.45417	1.06693e-25	3.66582e-24	down	26.9444	17.7017	51.0065	47.4412
ZNF519	zinc finger protein 519	-1.14188	0.453167	0.00609202	0.0170453	down	0.774264	0.711229	1.61023	1.68483
HIST3H2BB	histone cluster 3, H2bb	-1.14462	0.452308	2.89248e-05	0.000141261	down	2.09051	1.42246	4.17051	3.63568
ZNF688	zinc finger protein 688	-1.14715	0.451516	0.000100122	0.000438192	down	1.62595	1.34343	3.45727	3.14797
NRIP3	nuclear receptor interacting protein 3	-1.14936	0.450824	1.5422e-12	2.09222e-11	down	5.65213	5.05763	12.3136	11.4834
FADS2	fatty acid desaturase 2	-1.14988	0.450664	7.84349e-42	5.7996e-40	down	22.2214	25.2881	50.675	54.6682
SPACA6P	sperm acrosome associated 6, pseudogene	-1.15064	0.450425	0.00706922	0.0193722	down	0.619411	0.632203	1.51551	1.28579
PTPRD	protein tyrosine phosphatase, receptor type, D	-1.15212	0.449962	1.17132e-05	6.20452e-05	down	2.55507	1.42246	4.21502	4.65544
AUTS2	autism susceptibility candidate 2	-1.15272	0.449777	1.22312e-06	7.77536e-06	down	2.55507	2.13369	5.49374	4.9658
SLIT2	slit guidance ligand 2	-1.15387	0.449417	2.17925e-29	9.124e-28	down	12.8528	14.5407	31.3048	29.6618
C9orf116		-1.15474	0.449148	0.007023	0.0192539	down	0.619411	0.711229	1.56287	1.4188
CDKN2C	cyclin-dependent kinase inhibitor 2C (p18, inhibits CDK4)	-1.15485	0.449112	2.73451e-17	5.38553e-16	down	6.96837	9.87818	19.1807	18.3114
BHLHE40	basic helix-loop-helix family, member e40	-1.15503	0.449056	2.97842e-31	1.38964e-29	down	15.8724	13.6714	32.5836	33.2532
HMGB3	high mobility group box 3	-1.15575	0.448834	1.15503e-39	7.85172e-38	down	19.3566	21.4159	46.7441	44.1159
HIST2H2AB	histone cluster 2, H2ab	-1.15824	0.448059	2.50761e-27	9.55746e-26	down	11.3817	13.2763	27.8945	27.1346
SH3D21	SH3 domain containing 21	-1.1598	0.447574	0.000141095	0.000599062	down	0.929117	2.44979	3.36255	4.16773
SIGIRR	single immunoglobulin and toll-interleukin 1 receptor (TIR) domain	-1.16235	0.446783	0.00118439	0.00402132	down	1.08397	0.86928	2.08383	2.30555
HIST1H3I	histone cluster 1, H3i	-1.16482	0.446021	4.55655e-34	2.44123e-32	down	18.1178	21.5739	41.6766	47.2195
MSI1	musashi RNA-binding protein 1	-1.16774	0.445118	0.0114331	0.0292751	down	0.774264	0.316102	1.42079	1.0641
IQGAP3	IQ motif containing GTPase activating protein 3	-1.16951	0.444573	9.24795e-36	5.33932e-34	down	16.4144	17.3856	36.8459	39.15
FPGT-TNNI3K	FPGT-TNNI3K readthrough	-1.17033	0.44432	0.006461	0.0179033	down	0.831559	0.444123	1.41843	1.47733
PER2	period circadian clock 2	-1.17158	0.443934	1.11285e-09	1.10187e-08	down	3.63904	3.87225	8.09853	8.82317
LRRN3	leucine rich repeat neuronal 3	-1.17347	0.443353	3.48268e-07	2.42751e-06	down	2.78735	2.37076	5.25694	6.38461
PRELID2	PRELI domain containing 2	-1.1744	0.443067	2.23825e-09	2.12614e-08	down	3.01963	4.26737	8.24061	8.20245
CENPW	centromere protein W	-1.17506	0.442866	1.75592e-12	2.37453e-11	down	6.19411	4.89958	13.5449	11.5721
C8orf44-SGK3	C8orf44-SGK3 readthrough	-1.17664	0.442379	0.0132149	0.0331	down	2.36305	0	2.6602	2.72587
TMEM200A	transmembrane protein 200A	-1.17818	0.441907	0.000157901	0.000661094	down	1.1614	1.50148	2.74687	3.28098
TNFAIP3	tumor necrosis factor, alpha-induced protein 3	-1.18041	0.441227	8.32645e-93	2.14856e-90	down	108.087	97.3593	233.105	232.639
TREM1	triggering receptor expressed on myeloid cells 1	-1.18349	0.440285	1.88437e-05	9.57637e-05	down	2.09051	1.73856	3.59935	5.09882
GRIA1	glutamate receptor, ionotropic, AMPA 1	-1.19113	0.437961	0.00181075	0.00583821	down	0.85169	0.86928	2.32063	1.64049
ACBD7	acyl-CoA binding domain containing 7	-1.19193	0.437717	0.00091337	0.00319376	down	0.619411	1.26441	2.32063	1.99519
CAPS	calcyphosine	-1.19478	0.436852	0.000500012	0.00185317	down	1.08397	0.948305	2.41535	2.26121
WISP3	WNT1 inducible signaling pathway protein 3	-1.19503	0.436778	0.00485616	0.0139803	down	0.696837	0.86928	1.23136	2.34989
PDK3	pyruvate dehydrogenase kinase, isozyme 3	-1.19526	0.436709	5.34254e-45	4.35814e-43	down	21.2923	22.7593	48.5438	52.274
TRAM1L1	translocation associated membrane protein 1-like 1	-1.19612	0.436447	0.00559737	0.0158188	down	0.696837	0.632203	1.37343	1.68483
HIST1H4E	histone cluster 1, H4e	-1.19669	0.436276	1.20208e-63	1.61692e-61	down	42.3522	46.2299	98.4137	104.548
HIST1H2AK	histone cluster 1, H2ak	-1.20047	0.435134	5.44796e-09	4.93085e-08	down	3.17448	3.08199	7.53779	6.87232
ECHDC2	enoyl CoA hydratase domain containing 2	-1.20241	0.434548	0.00396119	0.0116749	down	1.08397	0.316102	1.79967	1.46314
CDC25C	cell division cycle 25C	-1.21325	0.431295	1.05384e-11	1.30125e-10	down	3.94875	4.74152	10.135	10.0203
COCH	cochlin	-1.21664	0.430283	0.00454571	0.0131735	down	0.696837	0.632203	1.32607	1.7735
HMGB2	high mobility group box 2	-1.21929	0.429495	1.9248e-82	4.50689e-80	down	61.3217	57.2144	138.622	137.446
FAM107A	family with sequence similarity 107, member A	-1.21953	0.429424	0.00632589	0.0175906	down	0.696837	0.474152	1.51551	1.24145
C10orf107	chromosome 10 open reading frame 107	-1.22257	0.428517	0.0025873	0.00804373	down	0.774264	0.632203	1.94175	1.37446
ATF4	activating transcription factor 4	-1.22456	0.427929	5.99558e-103	2.16595e-100	down	87.4918	85.6635	205.684	199.031
PDLIM1	PDZ and LIM domain 1	-1.22803	0.426899	1.20996e-08	1.04858e-07	down	3.79389	2.60784	6.67773	8.33546
SOX11	SRY (sex determining region Y)-box 11	-1.22852	0.426756	5.25588e-11	5.97083e-10	down	5.26499	4.26737	12.8345	9.57691
STMN3	stathmin-like 3	-1.2343	0.425048	7.28632e-05	0.000328326	down	1.4711	1.10636	3.03103	3.05929
NUDT13	nudix (nucleoside diphosphate linked moiety X)-type motif 13	-1.2356	0.424665	0.000665117	0.00240128	down	1.08397	0.790254	2.08383	2.34989
SHROOM2	shroom family member 2	-1.23656	0.424385	0.00291358	0.00891777	down	0.387132	1.10636	1.65759	1.86218
HIST1H2BE	histone cluster 1, H2be	-1.23692	0.424279	7.58516e-20	1.77935e-18	down	6.65867	8.53474	18.0152	17.7829
HIST1H1B	histone cluster 1, H1b	-1.24	0.423372	3.58893e-113	1.62066e-110	down	98.4089	101.232	238.978	232.595
HIST1H4J	histone cluster 1, H4j	-1.24157	0.422911	4.51441e-39	2.98849e-37	down	18.9044	17.8945	46.4661	40.6522
HIST1H2AJ	histone cluster 1, H2aj	-1.24469	0.421998	4.9454e-30	2.16365e-28	down	11.1238	10.7301	25.7396	26.0691
MSH5-SAPCD1	MSH5-SAPCD1 readthrough (NMD candidate)	-1.2518	0.419923	0.0123968	0.0313253	down	1.06152	0	1.75089	0.830442
BARX1	BARX homeobox 1	-1.25458	0.419117	3.01717e-08	2.44722e-07	down	2.47764	2.60784	6.53566	5.63087
RFX8	RFX family member 8, lacking RFX DNA binding domain	-1.25709	0.418386	7.05322e-09	6.28478e-08	down	3.09706	2.68686	6.20414	7.62606
HIST1H2BM	histone cluster 1, H2bm	-1.25933	0.417738	7.30268e-30	3.16216e-28	down	10.1429	11.7748	26.7109	25.7601
C3orf67	chromosome 3 open reading frame 67	-1.25937	0.417725	7.37685e-07	4.90394e-06	down	1.70338	2.21271	4.54654	4.83279
SCARNA9L	small Cajal body-specific RNA 9-like	-1.26015	0.4175	4.32935e-08	3.44278e-07	down	2.86478	2.05466	6.0147	5.80822
SLITRK4	SLIT and NTRK-like family, member 4	-1.26525	0.416027	0.00402904	0.0118445	down	0.696837	0.553178	1.75231	1.28579
HIST1H3B	histone cluster 1, H3b	-1.2654	0.415985	3.16295e-71	5.40438e-69	down	45.5267	52.3938	114.421	120.864
LRRC6	leucine rich repeat containing 6	-1.26712	0.415487	0.00378502	0.0112079	down	0.696837	0.474152	1.61023	1.24145
EFS	embryonal Fyn-associated substrate	-1.26944	0.414821	3.66353e-14	5.69063e-13	down	4.72301	5.37373	12.9766	11.3947
SYTL2	synaptotagmin-like 2	-1.26983	0.414709	4.35308e-10	4.52635e-09	down	3.63904	2.68686	7.53021	7.75907
LINC00623	long intergenic non-protein coding RNA 623	-1.27193	0.414105	0.000388554	0.00147889	down	1.05532	0.877182	2.58016	2.11978
PSAT1	phosphoserine aminotransferase 1	-1.27364	0.413614	2.97184e-68	4.27e-66	down	39.1778	43.9381	103.813	97.1436
DDIT4L	DNA-damage-inducible transcript 4-like	-1.27602	0.412933	1.68334e-16	3.11628e-15	down	6.19411	5.2947	14.35	13.523
ZNF876P	zinc finger protein 876, pseudogene	-1.28701	0.4098	0.00016711	0.000695274	down	0.85169	1.26441	2.60479	2.57158
BAALC	brain and acute leukemia, cytoplasmic	-1.28774	0.409592	2.51117e-05	0.000124271	down	1.39367	1.18538	3.22047	3.10363
GOLGA2P7	golgin A2 pseudogene 7	-1.28915	0.409192	0.000268246	0.0010619	down	1.16759	1.05341	3.45585	2.01647
HIST1H1D	histone cluster 1, H1d	-1.29545	0.407409	8.20001e-79	1.72802e-76	down	47.3075	48.6797	122.615	113.061
BDNF-AS	BDNF antisense RNA	-1.29937	0.406304	0.000193659	0.000790643	down	1.1614	0.86928	2.08383	2.92628
CENPV	centromere protein V	-1.30502	0.404716	1.07634e-06	6.91173e-06	down	1.70338	1.65953	4.02558	4.30074
RNF144A-AS1	RNF144A antisense RNA 1	-1.31113	0.403006	0.00297213	0.00907281	down	0.85169	0.316102	1.46815	1.46314
LOC100507557		-1.31949	0.400677	0.00475327	0.0137184	down	0.774264	0.316102	1.61023	1.15278
HIST1H3F	histone cluster 1, H3f	-1.32773	0.398394	1.69108e-46	1.45456e-44	down	17.9629	16.6744	41.5819	45.3573
EYA1	EYA transcriptional coactivator and phosphatase 1	-1.33178	0.397278	2.52207e-11	2.98029e-10	down	3.40676	3.00297	8.00381	8.15811
STARD4	StAR-related lipid transfer (START) domain containing 4	-1.3409	0.394773	1.52067e-31	7.14771e-30	down	10.0654	9.40402	24.1535	25.1837
CLDN7	claudin 7	-1.34643	0.393265	4.60964e-08	3.64732e-07	down	2.78735	1.50148	5.73054	5.23183
TNFAIP8L1	tumor necrosis factor, alpha-induced protein 8-like 1	-1.35815	0.390083	5.9623e-09	5.36564e-08	down	2.47764	2.13369	5.58846	6.25159
PLXDC2	plexin domain containing 2	-1.35899	0.389856	8.21167e-10	8.22822e-09	down	3.56161	2.05466	6.86717	7.58172
AS3MT	arsenite methyltransferase	-1.36124	0.389248	3.0423e-06	1.80342e-05	down	1.54853	1.26441	3.69975	3.55853
IGF2	insulin-like growth factor 2	-1.3666	0.387805	2.18919e-35	1.22479e-33	down	10.9945	9.95167	27.4687	26.6025
CDH2	cadherin 2, type 1, N-cadherin (neuronal)	-1.37484	0.385595	5.98642e-13	8.42898e-12	down	3.48419	3.47712	8.61949	9.4439
RRAD	Ras-related associated with diabetes	-1.38433	0.383067	0.0023116	0.00727968	down	0.541985	0.553178	1.27872	1.59615
PABPC4L	poly(A) binding protein, cytoplasmic 4-like	-1.39049	0.381435	0.00227344	0.00717201	down	0.774264	0.316102	1.75231	1.15278
PIH1D2	PIH1 domain containing 2	-1.39632	0.379896	2.20042e-05	0.000110143	down	0.929117	1.18538	2.65215	2.92628
ATP8B3	ATPase, aminophospholipid transporter, class I, type 8B, member 3	-1.40203	0.378395	0.00141939	0.00470426	down	0.541985	0.711229	1.23136	2.08386
EPGN	epithelial mitogen	-1.40786	0.376869	1.503e-19	3.44898e-18	down	4.95529	5.68983	14.0185	14.2324
NEURL1B	neuralized E3 ubiquitin protein ligase 1B	-1.414	0.375271	0.000574092	0.00210461	down	0.387132	0.948305	1.65759	1.90651
OLFML3	olfactomedin-like 3	-1.41653	0.374613	1.4602e-19	3.36299e-18	down	5.88441	4.89958	13.8291	14.9861
TRIB3	tribbles pseudokinase 3	-1.41773	0.374301	8.15564e-15	1.34271e-13	down	4.80044	3.39809	10.2771	11.6608
GABBR2	gamma-aminobutyric acid (GABA) B receptor, 2	-1.42026	0.373646	0.0026162	0.0081156	down	0.619411	0.395127	1.23136	1.50748
FBXO43	F-box protein 43	-1.42174	0.373262	0.00290692	0.00890171	down	0.232279	0.790254	1.46815	1.28579
ZC4H2	zinc finger, C4H2 domain containing	-1.42283	0.37298	2.4786e-08	2.05101e-07	down	1.78081	1.97564	5.5411	4.56677
HIST2H4A	histone cluster 2, H4a	-1.4235	0.372806	1.04693e-70	1.71913e-68	down	25.5894	22.7593	65.3566	64.4224
HIST2H4B	histone cluster 2, H4b	-1.4235	0.372806	1.04693e-70	1.71913e-68	down	25.5894	22.7593	65.3566	64.4224
TLR2	toll-like receptor 2	-1.42983	0.371176	1.71525e-09	1.65807e-08	down	4.4133	1.58051	8.38269	7.84774
ECM1	extracellular matrix protein 1	-1.43723	0.369275	8.48461e-09	7.47071e-08	down	1.54853	2.37076	5.11486	5.49786
HIST1H3E	histone cluster 1, H3e	-1.4504	0.365919	8.60687e-30	3.70154e-28	down	8.74918	8.77182	21.6908	26.1591
MAMSTR	MEF2 activating motif and SAP domain containing transcriptional regulator	-1.45305	0.365249	0.000913829	0.00319449	down	0.619411	0.474152	1.51551	1.50748
MIR210HG	MIR210 host gene	-1.45466	0.36484	2.27674e-09	2.15634e-08	down	2.09051	1.89661	5.87262	5.09882
HIST1H4D	histone cluster 1, H4d	-1.45697	0.364258	5.40853e-69	7.95179e-67	down	22.6859	20.7837	57.5895	61.7622
CCDC74A	coiled-coil domain containing 74A	-1.4594	0.363644	1.17542e-06	7.5023e-06	down	1.24889	1.33237	3.84183	3.28985
PYGM	phosphorylase, glycogen, muscle	-1.48572	0.35707	0.000343254	0.00132563	down	0.464558	0.790254	1.98911	1.55181
INHBA	inhibin, beta A	-1.4979	0.354069	7.75602e-07	5.11833e-06	down	1.23882	1.18538	3.59935	3.28098
ENO2	enolase 2 (gamma, neuronal)	-1.51182	0.350668	3.80525e-45	3.12426e-43	down	10.0654	10.9055	29.7893	30.0165
HIST1H4F	histone cluster 1, H4f	-1.5192	0.34888	4.43569e-80	9.50591e-78	down	21.1374	21.2578	60.5732	60.9641
LINC00673	long intergenic non-protein coding RNA 673	-1.52236	0.348115	1.58516e-11	1.92349e-10	down	2.55507	2.05466	6.63037	6.65063
ITGA8	integrin, alpha 8	-1.52981	0.346323	6.79982e-06	3.78253e-05	down	0.929117	1.02733	2.65215	3.01495
IGFBP7	insulin-like growth factor binding protein 7	-1.5332	0.345511	8.08824e-15	1.33335e-13	down	2.55507	3.95127	9.47196	9.35522
ZNF185	zinc finger protein 185 (LIM domain)	-1.55032	0.341434	8.45175e-16	1.49669e-14	down	3.32933	3.16102	9.18781	9.84293
LINC00707	long intergenic non-protein coding RNA 707	-1.55492	0.340346	4.29673e-12	5.54365e-11	down	2.01309	2.68686	6.58302	7.22702
KIF5C	kinesin family member 5C	-1.5782	0.3349	0.000488502	0.00181772	down	0.696837	0.316102	1.32607	1.72916
CCDC180	coiled-coil domain containing 180	-1.57888	0.334742	0.000287248	0.001131	down	1.46646	0	2.04452	2.39423
HIST1H4B	histone cluster 1, H4b	-1.58161	0.334109	4.25968e-80	9.28611e-78	down	19.2792	18.4919	57.0686	56.0427
RAB38	RAB38, member RAS oncogene family	-1.58442	0.333459	2.25803e-09	2.14182e-08	down	1.23882	2.05466	4.68862	5.18749
ROBO3	roundabout guidance receptor 3	-1.58567	0.33317	8.34109e-05	0.000370963	down	0.309706	1.02733	1.75231	2.26121
TCEA3	transcription elongation factor A (SII), 3	-1.58907	0.332386	8.37345e-12	1.04412e-10	down	1.85823	2.37076	6.58302	6.16292
DIO2	deiodinase, iodothyronine, type II	-1.5925	0.331596	4.04207e-07	2.79126e-06	down	1.39367	1.10636	3.03103	4.52243
NTM	neurotrimin	-1.60777	0.328104	9.4225e-06	5.09355e-05	down	1.08397	0.553178	2.36799	2.66025
KATNAL2	katanin p60 subunit A-like 2	-1.6102	0.327553	1.22815e-06	7.80338e-06	down	0.85169	1.10636	3.03103	2.97062
PEG3	paternally expressed 3	-1.6304	0.322998	1.43952e-15	2.51747e-14	down	2.9422	2.68686	9.36493	8.11865
NAP1L3	nucleosome assembly protein 1-like 3	-1.63052	0.322973	3.61961e-11	4.19875e-10	down	1.54853	2.76589	7.48285	5.89689
DKFZP434I0714		-1.63108	0.322845	0.000305617	0.00119303	down	0.464558	0.474152	1.75231	1.19711
C7orf31	chromosome 7 open reading frame 31	-1.63501	0.321968	1.61486e-06	1.00434e-05	down	0.619411	1.42246	2.74687	3.59134
HIST1H4C	histone cluster 1, H4c	-1.63735	0.321446	1.8719e-98	5.50427e-96	down	24.157	28.054	80.5591	81.8028
NXPH4	neurexophilin 4	-1.64244	0.320315	3.60574e-08	2.89283e-07	down	1.1614	1.26441	3.74143	3.85737
SHOX	short stature homeobox	-1.66594	0.31514	4.09535e-06	2.38295e-05	down	0.85169	0.711229	2.60479	2.39423
F3	coagulation factor III (thromboplastin, tissue factor)	-1.67334	0.313527	4.53343e-16	8.21214e-15	down	2.78735	2.76589	8.14589	9.57691
LIF	leukemia inhibitory factor	-1.69431	0.309002	3.08242e-55	3.35984e-53	down	13.7819	9.72013	37.6511	38.5293
HIF3A	hypoxia inducible factor 3, alpha subunit	-1.71501	0.304601	0.000164067	0.000683963	down	0.464558	0.474152	1.56287	1.55181
ARG2	arginase 2	-1.71547	0.304504	0.000165392	0.000689261	down	0.464558	0.474152	1.61023	1.50748
MT1M	metallothionein 1M	-1.73987	0.299396	0.000171815	0.000712506	down	0.619411	0.316102	1.89439	1.28579
DDIT3	DNA-damage-inducible transcript 3	-1.7539	0.2965	3.16316e-17	6.17206e-16	down	3.40676	2.21271	8.66685	10.3306
HIST1H4L	histone cluster 1, H4l	-1.75923	0.295407	1.34869e-51	1.34274e-49	down	9.36859	8.61377	28.5106	32.3664
ERG	v-ets avian erythroblastosis virus E26 oncogene homolog	-1.76605	0.294012	2.95606e-05	0.000144032	down	0.541985	0.553178	2.03647	1.72916
ARHGEF34P	Rho guanine nucleotide exchange factor (GEF) 34, pseudogene	-1.8173	0.283751	2.35547e-08	1.9564e-07	down	0.882661	1.05815	3.80915	3.07437
LOC100996579		-1.81902	0.283414	0.000304102	0.00118858	down	0.387132	0.316102	1.32607	1.19711
NPTX1	neuronal pentraxin I	-1.82291	0.28265	1.83926e-08	1.55869e-07	down	0.929117	1.02733	3.26783	3.68002
PHGDH	phosphoglycerate dehydrogenase	-1.82553	0.282136	4.04992e-100	1.313e-97	down	17.8081	17.3856	59.9102	64.8215
PABPC5	poly(A) binding protein, cytoplasmic 5	-1.84174	0.278985	0.000233711	0.000939003	down	0.309706	0.395127	1.08928	1.46314
HNRNPH2	heterogeneous nuclear ribonucleoprotein H2 (H')	-1.84619	0.278126	1.44529e-154	1.14214e-151	down	33.9863	32.2392	120.768	117.45
ZNF204P	zinc finger protein 204, pseudogene	-1.84901	0.277582	0.000515302	0.00190578	down	0.541985	0.0790254	1.184	1.10844
GAL3ST4	galactose-3-O-sulfotransferase 4	-1.85157	0.27709	4.4218e-07	3.02867e-06	down	1.00654	0.474152	2.51007	2.88194
ULBP1	UL16 binding protein 1	-1.85866	0.275732	2.70955e-07	1.9247e-06	down	0.696837	0.818703	2.65215	2.87396
DRP2	dystrophin related protein 2	-1.87114	0.273356	6.06095e-08	4.69575e-07	down	0.696837	0.948305	3.12575	2.92628
ALDOC	aldolase C, fructose-bisphosphate	-1.94469	0.25977	5.00115e-51	4.8642e-49	down	7.97492	5.37373	25.4322	26.0705
ASNS	asparagine synthetase (glutamine-hydrolyzing)	-1.95726	0.257517	3.28443e-131	1.88765e-128	down	23.2279	25.0511	96.8508	90.6703
ITGA11	integrin, alpha 11	-1.95925	0.257162	2.33638e-05	0.00011635	down	0.464558	0.395127	1.61023	1.7735
ANGPT2	angiopoietin 2	-1.96339	0.256426	3.99248e-29	1.63369e-27	down	3.79389	3.16102	13.0713	14.0993
HIST1H4I	histone cluster 1, H4i	-1.96473	0.256187	3.91267e-42	2.94475e-40	down	4.56816	5.2947	19.2281	19.2868
SPAG4	sperm associated antigen 4	-1.97451	0.254457	1.33882e-12	1.82809e-11	down	1.31625	1.10636	4.73598	4.83279
PTPRQ	protein tyrosine phosphatase, receptor type, Q	-2.01022	0.248235	2.98749e-15	5.11148e-14	down	2.09051	1.02733	6.34622	6.29593
ZNF300P1	zinc finger protein 300 pseudogene 1 (functional)	-2.03361	0.244243	6.70246e-05	0.000304076	down	0.541985	0.158051	1.23136	1.68483
ZNF711	zinc finger protein 711	-2.05613	0.240459	3.77541e-05	0.000180273	down	0.309706	0.395127	1.32607	1.64049
PLEKHA6	pleckstrin homology domain containing, family A member 6	-2.0834	0.235958	3.69655e-05	0.000177042	down	0.309706	0.316102	1.184	1.50748
VWA1	von Willebrand factor A domain containing 1	-2.08557	0.235603	1.60004e-06	9.96594e-06	down	0.774264	0.158051	1.94175	2.08386
JAM2	junctional adhesion molecule 2	-2.10807	0.231957	2.64867e-12	3.49945e-11	down	1.4711	0.632203	4.21502	4.92147
WISP1	WNT1 inducible signaling pathway protein 1	-2.11497	0.230851	2.03915e-13	3.00046e-12	down	1.08397	1.10636	5.0675	4.47809
PDE10A	phosphodiesterase 10A	-2.12127	0.229845	5.13159e-13	7.27397e-12	down	1.08397	1.18538	5.68318	4.2564
POU3F3	POU class 3 homeobox 3	-2.17636	0.221233	7.19607e-08	5.51437e-07	down	0.929117	0.158051	2.65215	2.34989
CSRP2	cysteine and glycine-rich protein 2	-2.18917	0.219277	2.34444e-17	4.64626e-16	down	1.70338	1.34343	7.95645	6.02991
PPP1R13L	protein phosphatase 1, regulatory subunit 13 like	-2.23624	0.212239	2.8894e-14	4.52708e-13	down	1.08397	1.02733	5.58846	4.43375
FAIM2	Fas apoptotic inhibitory molecule 2	-2.29394	0.203918	1.38148e-05	7.21198e-05	down	0.541985	0	1.04192	1.68483
NUDT10	nudix (nucleoside diphosphate linked moiety X)-type motif 10	-2.30229	0.202741	2.51047e-07	1.79133e-06	down	0.406489	0.429898	2.60574	1.59305
TUSC1	tumor suppressor candidate 1	-2.37364	0.192958	2.62626e-07	1.86868e-06	down	0.387132	0.316102	1.79967	1.90651
FGF11	fibroblast growth factor 11	-2.48119	0.179097	1.86933e-08	1.58099e-07	down	0.232279	0.553178	1.94175	2.4829
RAB39B	RAB39B, member RAS oncogene family	-2.49753	0.17708	2.29186e-10	2.46412e-09	down	0.387132	0.632203	2.69951	3.10363
SCARNA10	small Cajal body-specific RNA 10	-2.5355	0.17248	1.08496e-35	6.20732e-34	down	2.01309	2.21271	11.3664	13.1682
CHAC1	ChaC glutathione-specific gamma-glutamylcyclotransferase 1	-2.56365	0.169147	1.25546e-13	1.88752e-12	down	0.774264	0.474152	3.83615	3.63568
KRTAP1-5	keratin associated protein 1-5	-2.59035	0.166045	7.56141e-06	4.17313e-05	down	0.232279	0.158051	1.23136	1.19711
AMOT	angiomotin	-2.61762	0.162937	1.94494e-10	2.10727e-09	down	0.541985	0.316102	2.51007	2.8376
SULT1E1	sulfotransferase family 1E, estrogen-preferring, member 1	-2.63943	0.160492	1.22486e-07	9.09401e-07	down	0.464558	0.0790254	1.94175	1.55181
DCHS1	dachsous cadherin-related 1	-2.721	0.151669	7.59448e-10	7.65136e-09	down	0.309706	0.395127	2.55743	2.17254
TMSB15B	thymosin beta 15B	-2.74223	0.149454	9.93109e-07	6.42953e-06	down	0.0774264	0.316102	1.23136	1.46314
FBLN7	fibulin 7	-2.74772	0.148886	1.31924e-06	8.34441e-06	down	0.232279	0.158051	1.65759	1.0641
FAM225B	family with sequence similarity 225, member B (non-protein coding)	-2.91269	0.132799	1.46949e-06	9.21639e-06	down	0.301189	0	1.14516	1.23746
SULT1B1	sulfotransferase family, cytosolic, 1B, member 1	-2.96905	0.127711	4.8213e-11	5.52179e-10	down	0.232279	0.395127	2.74687	2.26121
CA9	carbonic anhydrase IX	-2.98267	0.12651	2.95512e-107	1.20531e-104	down	4.49073	3.24004	31.2101	30.1052
MKX	mohawk homeobox	-3.16418	0.111554	3.1206e-13	4.54572e-12	down	0.464558	0.158051	2.79423	2.92628
NLGN4X	neuroligin 4, X-linked	-3.38549	0.0956899	3.33639e-18	7.00753e-17	down	0.24699	0.490748	3.77363	4.04314
ADM2	adrenomedullin 2	-3.43618	0.0923859	1.31275e-10	1.43584e-09	down	0.154853	0.237076	1.56287	2.79327
NDUFA4L2	NADH dehydrogenase (ubiquinone) 1 alpha subcomplex, 4-like 2	-3.55613	0.0850154	4.20236e-112	1.83223e-109	down	2.78735	2.21271	27.2793	31.7013
CPXM2	carboxypeptidase X (M14 family), member 2	-3.74343	0.0746645	4.81609e-14	7.44433e-13	down	0.309706	0.0790254	3.07839	2.34989
HCAR1	hydroxycarboxylic acid receptor 1	-3.97235	0.0637092	6.05929e-12	7.67671e-11	down	0	0.237076	2.08383	1.81784
CAPN6	calpain 6	-3.98767	0.0630367	6.79175e-09	6.06033e-08	down	0.0774264	0.0790254	1.08928	1.59615
SORCS2	sortilin-related VPS10 domain containing receptor 2	-4.03912	0.0608278	1.88289e-09	1.80495e-08	down	0	0.158051	1.46815	1.33013
GPR75-ASB3	GPR75-ASB3 readthrough	-6.68668	0.00970756	2.68314e-29	1.11232e-27	down	0	0.0845572	6.24013	3.88175
KCTD14	potassium channel tetramerization domain containing 14	-9.38958	0.00149092	2.69441e-32	1.32561e-30	down	0	0	5.57946	4.11364
