# Supplementary material for: Overexpression of miR-10a-5p facilitates the progression of osteoarthritis
Source: Aging (Albany NY). 2020 Apr 13;12(7):5948–76. doi: 10.18632/aging.102989 (PMC7185093; doi:10.18632/aging.102989)
Supplement: Supplementary Table 3 [file aging-12-102989-s005..xlsx]

## Sheet: Sheet 1
Table S3:Detailed differentially expressed lncRNAs between miR-10a-5p overexpression group(exp) and control group(ctrl).
lncRNA_ID	Cis_target_gene	logFC	foldChange	PValue	pAdj	diffState	M1	M2	NC-3	NC-4
LINC-PINT:83	LINC-PINT	9.29436	627.888	2.41414e-16	7.58125e-14	up	3.62968	5.39424	0	0
lnc-APOA2-1:5	APOA2	9.1817	580.719	2.63077e-18	9.98267e-16	up	4.53277	3.80675	0	0
lnc-EIF2AK3-4:77	EIF2AK3	9.15071	568.377	6.28396e-16	1.8433e-13	up	3.38854	4.77868	0	0
LINC00941:23	LINC00941	8.95225	495.33	1.99054e-36	3.62557e-33	up	10.0837	8.38295	0	0.0221896
EPB41L4A-AS1:6	EPB41L4A	8.78022	439.653	4.03925e-09	3.83182e-07	up	4.43821	1.87017	0	0
LOXL1-AS1:3	LOXL1	8.75711	432.667	7.74565e-14	1.43958e-11	up	3.49651	2.71251	0	0
lnc-KCNE1B-1:2	KCNE1B	8.46406	353.13	6.06208e-09	5.48072e-07	up	1.66827	3.40178	0	0
lnc-CTDSP2-2:2	CTDSP2	8.3823	333.675	2.65663e-06	0.000135162	up	3.74395	1.03997	0	0
LINC01278:8	LINC01278	8.3108	317.541	6.07833e-09	5.48072e-07	up	1.59419	2.96359	0	0
EIF1B-AS1:16	EIF1B	8.24318	303.002	4.77677e-10	5.17882e-08	up	2.59105	1.75191	0	0
lnc-DCTD-65:8	DCTD	8.21941	298.05	7.128e-06	0.00031512	up	0.910967	3.36614	0	0
lnc-AMN1-2:7	AMN1	8.08774	272.053	1.36246e-10	1.69971e-08	up	2.01973	1.87989	0	0
LINC01133:10	LINC01133	8.0542	265.8	3.50989e-10	4.04614e-08	up	1.75495	2.05645	0	0
lnc-PHF3-1:4	PHF3	8.02008	259.589	6.15327e-10	6.59268e-08	up	2.03076	1.68874	0	0
lnc-LRP5-1:11	LRP5	7.93929	245.451	3.44751e-06	0.000168798	up	0.954309	2.56591	0	0
lnc-FKBP2-1:7	FKBP2	7.92503	243.037	2.46699e-09	2.36493e-07	up	1.91729	1.56401	0	0
LINC00963:14	LINC00963	7.92358	242.792	1.05672e-05	0.000441446	up	0.847136	2.63476	0	0
DLEU1:54	DLEU1	7.81167	224.671	1.01183e-08	9.03407e-07	up	1.44762	1.87341	0	0.00043509
ZFAS1:22	ZFAS1	7.6471	200.45	6.22973e-07	3.75723e-05	up	1.07567	1.79646	0	0
lnc-FAM84B-15:122	FAM84B	7.62915	197.971	6.4349e-05	0.0020419	up	2.1797	0.652007	0	0
NR2F1-AS1:22	NR2F1	7.62786	197.795	8.26423e-08	6.11889e-06	up	1.26007	1.57292	0	0
lnc-BRF1-9:3	BRF1	7.60943	195.284	3.65765e-08	2.89654e-06	up	1.41846	1.37691	0	0
lnc-SNRPN-8:128	SNRPN	7.57096	190.145	1.57101e-16	5.10969e-14	up	3.31289	3.77678	0.0237196	0
lnc-LDAH-8:1	LDAH	7.56032	188.749	3.04492e-05	0.0011004	up	1.97008	0.728952	0	0
lnc-SGMS1-5:1	SGMS1	7.53187	185.063	1.73369e-05	0.00067186	up	0.788034	1.86288	0	0
UBA6-AS1:2	UBA6	7.50395	181.516	2.35811e-05	0.000876544	up	1.83612	0.75892	0	0
lnc-ZNF131-4:1	ZNF131	7.48911	179.658	2.99736e-05	0.00108753	up	1.83612	0.732192	0	0
lnc-PJVK-2:17	PJVK	7.48869	179.606	1.27119e-06	7.01622e-05	up	1.55164	1.01648	0	0
RASSF8-AS1:19	RASSF8	7.30267	157.878	1.20451e-05	0.000491905	up	0.835316	1.42389	0	0
lnc-COL9A2-1:6	COL9A2	7.25445	152.689	2.97346e-06	0.00014717	up	1.20412	0.977605	0	0
SCAMP1-AS1:6	SCAMP1	7.2416	151.335	5.96855e-05	0.00190638	up	1.48072	0.680355	0	0
LINC01270:2	LINC01270	7.22185	149.277	2.8728e-06	0.000144545	up	1.03154	1.10234	0	0
lnc-ZNF324B-1:1	ZNF324B	7.18613	145.626	0.000264032	0.00636967	up	0.531135	1.61746	0	0.00043509
lnc-SFPQ-2:7	SFPQ	7.11844	138.952	6.62404e-06	0.000295711	up	0.999227	0.985705	0	0
lnc-IL31RA-1:5	IL31RA	7.03418	131.069	1.55893e-05	0.000617268	up	0.984254	0.886891	0	0
LINC01094:25	LINC01094	6.91432	120.619	0.000118427	0.00327816	up	0.642247	1.08047	0	0
MIR210HG:10	MIR210HG	6.90872	120.152	2.48481e-06	0.000129309	up	0.969281	1.34046	0	0.00478599
lnc-FMOD-2:2	FMOD	6.8663	116.671	4.83217e-05	0.00160608	up	0.852652	0.811566	0	0
lnc-IRX3-80:12	IRX3	6.76794	108.982	0.000332673	0.00776834	up	1.0079	0.544284	0	0
OTUD6B-AS1:13	OTUD6B	6.68922	103.194	0.000131743	0.00359216	up	0.74548	0.724902	0	0
UBA6-AS1:4	UBA6	6.68628	102.984	0.000269285	0.00647065	up	0.5729	0.895801	0	0
ZNF710-AS1:8	ZNF710	6.66351	101.372	0.000186072	0.00482781	up	0.767545	0.676305	0	0
PDCD4-AS1:9	PDCD4	6.63738	99.5522	0.000232568	0.00569354	up	0.617818	0.801037	0	0
lnc-EMC3-1:18	EMC3	6.58894	96.2653	0.00038809	0.00885799	up	0.811675	0.558053	0	0
lnc-DDX18-9:1	DDX18	6.57235	95.1644	3.38964e-28	2.80632e-25	up	11.8205	19.6007	0.232545	0.0870181
EPB41L4A-AS1:4	EPB41L4A	6.49346	90.1003	0.000271455	0.00650564	up	5.19945	0.655247	0	0.0496003
lnc-SMDT1-3:42	SMDT1	6.48316	89.4595	0.000630113	0.0131605	up	0.535863	0.737861	0	0
FGF14-AS2:1	FGF14	6.41586	85.382	0.000701143	0.0144138	up	0.566596	0.647957	0	0
lnc-MRPL32-5:3	MRPL32	6.37149	82.7962	0.000776059	0.0155673	up	0.529559	0.647957	0	0
GABPB1-AS1:2	GABPB1	6.36656	82.5134	0.000707409	0.0144773	up	0.575265	0.59774	0	0
MAPKAPK5-AS1:15	MAPKAPK5	6.12087	69.5928	7.20275e-07	4.25945e-05	up	2.18049	1.06508	0.0320912	0.00130527
lnc-ANKRD34B-4:2	ANKRD34B	6.07766	67.5394	3.50903e-21	1.45258e-18	up	141.653	279.099	4.26208	1.95878
lnc-MTRNR2L12-3:5	MTRNR2L12	5.92961	60.9524	6.91837e-25	3.50031e-22	up	135.41	258.822	4.22116	2.23767
lnc-MTRNR2L12-3:1	MTRNR2L12	5.91239	60.229	1.16219e-28	1.05841e-25	up	166.689	309.838	4.98483	2.91728
lnc-ANKRD34B-4:1	ANKRD34B	5.85762	57.9856	8.10232e-28	6.14899e-25	up	50.6272	92.909	1.59805	0.869311
lnc-MTRNR2L12-3:3	MTRNR2L12	5.82751	56.788	8.70483e-30	8.80833e-27	up	33.9966	65.506	0.93297	0.805787
LINC01766:11	LINC01766	5.7121	52.4219	1.63851e-11	2.36855e-09	up	198.581	543.102	10.2901	3.84446
lnc-GNG11-3:6	GNG11	5.54533	46.6992	1.54707e-08	1.31675e-06	up	1.39482	1.56887	0	0.0478599
lnc-AUTS2-6:1	AUTS2	5.53978	46.52	3.77856e-14	7.64697e-12	up	14.3856	38.2716	0.712983	0.40768
lnc-FGA-2:2	FGA	5.477	44.5392	1.00399e-12	1.63274e-10	up	2.2853	2.34884	0.046509	0.043509
LINC01766:2	LINC01766	5.24472	37.9157	4.69642e-11	6.28976e-09	up	10.012	26.7266	0.689263	0.269756
lnc-SNRPN-8:144	SNRPN	5.1262	34.9252	1.79523e-10	2.17989e-08	up	2.34361	2.15041	0.118133	0
TMEM72-AS1:12	TMEM72	4.84618	28.7637	9.99692e-05	0.0028362	up	1.10246	0.647957	0.0483693	0
lnc-SRGAP2C-16:1	SRGAP2C	4.48616	22.4114	2.22821e-12	3.56005e-10	up	2.83692	3.56376	0.139527	0.132267
PDZRN3-AS1:7	PDZRN3	4.40905	21.245	0.000161838	0.00424742	up	0.774637	1.62232	0	0.0965901
MIR762HG:4	MIR762HG	4.3931	21.0114	4.22741e-05	0.00143653	up	1.17259	0.939538	0.0892973	0
lnc-GCNT1-4:1	GCNT1	4.30102	19.7123	1.90147e-10	2.24891e-08	up	67.8497	187.341	8.23209	4.69898
lnc-GOLGA8O-1:2	GOLGA8O	4.06531	16.741	0.000306181	0.00721591	up	0.747056	1.11044	0	0.0948497
lnc-GPR183-47:7	GPR183	3.94202	15.3697	0.000119365	0.00329411	up	1.16865	0.861783	0	0.115734
lnc-COL4A5-3:1	COL4A5	3.78325	13.768	6.01888e-07	3.65426e-05	up	5.83933	18.0002	1.08226	0.637843
lnc-NBPF14-6:1	NBPF14	3.71778	13.1572	0.00097114	0.0184701	up	0.630427	0.728952	0.046509	0.043509
lnc-ANXA2R-1:31	ANXA2R	3.67351	12.7596	0.00531696	0.073034	up	2.72817	1.07885	0.288821	0
lnc-GNAI1-5:2	GNAI1	3.56263	11.8157	0.000722903	0.0147245	up	1.02444	0.728952	0.093018	0.043509
lnc-EFCAB1-7:3	EFCAB1	3.48104	11.166	0.0016011	0.0281771	up	0.905451	0.865023	0.148829	0
lnc-SPRY1-11:25	SPRY1	3.47392	11.111	0.00353444	0.0538263	up	0.914907	0.596931	0.026045	0.0952848
lnc-OTOP1-6:11	OTOP1	3.45341	10.9542	0.0037534	0.056687	up	0.732871	0.821286	0	0.125741
lnc-PPDPFL-5:1	PPDPFL	3.38432	10.442	0.007593	0.0977294	up	1.0205	0.575062	0.142783	0
SNHG10:16	SNHG10	3.37374	10.3656	0.00604354	0.0809994	up	0.551624	0.561293	0.0962736	0.00043509
lnc-GAN-1:4	GAN	3.36164	10.2791	0.000858524	0.0169969	up	1.1324	0.933058	0.0246498	0.160113
lnc-DLK1-35:142	DLK1	3.35587	10.2381	0.0064141	0.0849029	up	0.747056	1.13312	0.173944	0
lnc-TRIQK-1:1	TRIQK	3.34345	10.1503	1.03188e-08	9.12366e-07	up	2.32155	2.42984	0.192082	0.261054
lnc-CNOT9-1:1	CNOT9	3.27001	9.64652	4.39662e-34	5.00501e-31	up	15.6748	13.7318	1.45387	1.57807
lnc-HIST2H3D-1:1	HIST2H3D	3.26949	9.64304	0.00490432	0.0688192	up	0.866837	0.971936	0	0.174036
lnc-ATXN2L-1:2	ATXN2L	3.19691	9.16991	0.00419436	0.0616097	up	1.44604	1.10477	0	0.261054
lnc-AUTS2-6:2	AUTS2	3.07898	8.45016	1.37514e-07	9.93921e-06	up	141.322	321.73	36.0166	18.7515
lnc-SERPINB6-1:12	SERPINB6	3.05178	8.29233	0.00221256	0.0369044	up	0.690317	1.05941	0.133016	0.0665688
lnc-FRMD5-3:2	FRMD5	3.00721	8.04006	0.000132202	0.00359393	up	4.41535	2.45495	0.185571	0.650895
lnc-GOLGA6L22-3:2	GOLGA6L22	2.99833	7.99075	0.0010628	0.0197127	up	0.94564	0.964646	0.186036	0.043509
lnc-ZNF365-1:2	ZNF365	2.98139	7.89747	0.00424039	0.0620856	up	0.721839	0.852064	0.0451137	0.139229
lnc-RAB1A-12:1	RAB1A	2.92023	7.56967	0.00039665	0.00903073	up	1.18678	1.15984	0.0581362	0.235384
lnc-PON2-3:1	PON2	2.89546	7.4408	1.37308e-37	3.12616e-34	up	19.4644	18.0618	2.27894	2.74107
lnc-FKBP8-2:1	FKBP8	2.79332	6.93222	2.68291e-05	0.000981255	up	2.75812	1.70089	0.372072	0.261054
lnc-SYK-2:2	SYK	2.7569	6.75944	1.34398e-06	7.37325e-05	up	2.39011	2.3537	0.452998	0.240605
lnc-GINS1-2:1	GINS1	2.67385	6.3813	9.53839e-05	0.00277455	up	1.28292	1.12826	0.191152	0.174906
lnc-FBXL20-1:2	FBXL20	2.58239	5.9893	4.62013e-10	5.06934e-08	up	4.6494	4.13073	0.727866	0.725731
lnc-ZNF672-1:3	ZNF672	2.56562	5.92008	2.46258e-08	2.0575e-06	up	4.51701	4.97307	0.564154	1.01855
lnc-SYK-2:1	SYK	2.52571	5.75856	1.81933e-06	9.68928e-05	up	3.44134	2.50597	0.477182	0.542558
lnc-NT5E-10:4	NT5E	2.43301	5.40017	0.00206168	0.0348343	up	4.12299	1.40121	0.46509	0.545603
LINC01481:14	LINC01481	2.3439	5.07672	2.69291e-07	1.82414e-05	up	3.53039	3.22035	0.549736	0.764019
lnc-CHI3L1-1:3	CHI3L1	2.32687	5.01717	2.44498e-35	3.71108e-32	up	231.839	188.637	41.0674	42.6824
lnc-SP110-8:2	SP110	2.27051	4.82494	1.98336e-22	9.03121e-20	up	14.0238	13.0126	2.99936	2.59749
lnc-FGFR1OP2-6:2	FGFR1OP2	2.20216	4.60167	0.000487763	0.0106524	up	2.30815	5.2282	0.806001	0.818405
lnc-AKR1C2-6:4	AKR1C2	2.15023	4.43898	0.00019943	0.00511609	up	2.12769	1.70089	0.325563	0.522108
MIR100HG:68	MIR100HG	2.12309	4.35626	0.00157308	0.0277636	up	1.2514	1.05293	0.277659	0.24104
lnc-GUCY1A2-1:1	GUCY1A2	2.10628	4.3058	5.8893e-06	0.000265514	up	3.15213	4.45471	0.883671	0.870181
lnc-ATRN-4:3	ATRN	2.07756	4.22092	0.00038495	0.00880838	up	2.01027	1.76001	0.562294	0.324142
ZNF433-AS1:30	ZNF433	2.06607	4.18743	1.11661e-06	6.20059e-05	up	3.86136	5.02977	0.917622	1.18867
lnc-SLC12A8-2:2	SLC12A8	2.01299	4.03619	0.00441159	0.0634697	up	1.10325	1.86288	0.46509	0.261054
lnc-BRF2-19:1	BRF2	1.99558	3.98777	5.15433e-08	4.012e-06	up	7.94259	5.77492	1.57712	1.84826
lnc-PPP1R3G-9:12	PPP1R3G	1.9738	3.92802	8.54895e-05	0.00257799	up	2.25062	2.97898	0.660893	0.658292
lnc-GCG-3:1	GCG	1.94734	3.85663	9.30916e-16	2.35496e-13	up	9.85042	9.96234	2.51149	2.61054
lnc-KCNA1-97:6	KCNA1	1.90445	3.74367	9.62729e-05	0.00277455	up	2.20649	2.59183	0.661823	0.609127
lnc-GCG-4:1	GCG	1.86483	3.64225	2.634e-38	7.99593e-35	up	42.081	42.8462	11.7668	11.5299
lnc-CLK1-3:7	CLK1	1.83725	3.57328	2.48733e-05	0.000917089	up	3.38854	2.91581	0.883671	0.870181
A1BG-AS1:9	A1BG	1.82656	3.5469	0.00128256	0.0233606	up	2.04889	1.81995	0.695309	0.389841
lnc-GRM6-4:2	GRM6	1.82411	3.54089	2.67517e-06	0.000135349	up	13.6669	8.95963	2.54218	3.82749
lnc-CCDC38-7:1	CCDC38	1.82133	3.53407	0.00620658	0.0826365	up	2.99453	1.61989	0.46509	0.826672
lnc-PPIAL4F-11:1	PPIAL4F	1.81993	3.53064	9.07439e-05	0.00268313	up	3.15213	2.59183	0.744144	0.870181
lnc-FKBP11-1:2	FKBP11	1.80348	3.49062	0.00658403	0.0865234	up	1.10325	0.971936	0.279054	0.304563
lnc-PAPPA-1:4	PAPPA	1.78655	3.44989	0.00507078	0.0702886	up	9.84727	3.47629	1.82734	2.02317
lnc-SPOCK1-1:1	SPOCK1	1.78426	3.44441	2.59241e-06	0.000133354	up	7.64393	5.26465	1.99989	1.74036
lnc-SLC25A22-1:1	SLC25A22	1.78006	3.4344	0.00449337	0.0643413	up	1.81248	1.29591	0.325563	0.565618
lnc-FRMD5-3:3	FRMD5	1.75555	3.37654	0.00252055	0.0410638	up	1.44131	1.25299	0.447416	0.342416
lnc-GFRA1-1:1	GFRA1	1.71136	3.2747	1.35589e-06	7.39405e-05	up	4.5706	4.45471	1.44178	1.30527
lnc-SERPINB6-1:1	SERPINB6	1.65481	3.14881	0.00104195	0.0194847	up	2.25062	2.05078	0.772979	0.586067
LINC01060:22	LINC01060	1.65414	3.14735	0.00145542	0.0260915	up	1.71319	1.78836	0.459974	0.638713
lnc-OSR2-3:1	OSR2	1.64469	3.12681	0.00111021	0.0205501	up	2.04889	1.78188	0.651126	0.565618
lnc-SNRPN-8:107	SNRPN	1.63573	3.10744	0.000406318	0.00918198	up	8.52416	7.60621	3.54445	1.64551
lnc-TMEM167A-4:7	TMEM167A	1.63366	3.10299	3.77552e-12	5.92822e-10	up	21.1997	25.3862	8.43115	6.57596
lnc-TMOD3-2:1	TMOD3	1.61637	3.06602	0.00317895	0.0493198	up	2.20649	1.5389	0.558108	0.652636
lnc-C5AR1-3:1	C5AR1	1.61615	3.06556	0.000229646	0.00565793	up	2.75812	3.0778	1.06971	0.826672
lnc-LARP7-2:1	LARP7	1.61303	3.05893	0.000470627	0.0103777	up	2.83613	3.47791	0.832511	1.21477
lnc-CBR1-9:1	CBR1	1.60844	3.04922	0.00711161	0.0919963	up	2.20649	1.5389	0.744144	0.478599
MIR663AHG:43	MIR663AHG	1.6071	3.0464	8.41431e-14	1.53258e-11	up	59.35	78.0246	22.9745	22.0848
lnc-AKR1C3-1:1	AKR1C3	1.59238	3.01546	0.000110639	0.00308132	up	3.15213	3.80675	1.23249	1.06597
lnc-AKR1C3-1:2	AKR1C3	1.59238	3.01546	0.000110639	0.00308132	up	3.15213	3.80675	1.23249	1.06597
lnc-ELFN1-2:1	ELFN1	1.5908	3.01217	0.000945875	0.0181349	up	2.45236	3.59454	1.07994	0.917606
lnc-JUNB-1:1	JUNB	1.54924	2.92663	0.00462834	0.0659629	up	1.57607	2.26785	0.604617	0.696145
LINC-PINT:77	LINC-PINT	1.53449	2.89685	5.88465e-05	0.00188703	up	5.01268	7.47743	2.26452	2.03535
lnc-KCNS2-2:1	KCNS2	1.52441	2.8767	0.00421589	0.0618263	up	2.99453	2.42984	0.651126	1.21825
lnc-C1GALT1C1-1:1	C1GALT1C1	1.51979	2.86749	0.000148228	0.0039356	up	4.6494	3.64476	1.58131	1.30527
lnc-HSPB6-2:1	HSPB6	1.51853	2.86499	8.77027e-16	2.28202e-13	up	112.137	102.782	33.44	41.5076
lnc-ZFY-3:1	ZFY	1.50765	2.84347	3.6163e-05	0.00126182	up	4.01897	3.80675	1.34876	1.39229
lnc-KCNK7-7:1	KCNK7	1.496	2.8206	1.40919e-06	7.63899e-05	up	5.65808	5.45823	2.08639	1.84739
lnc-SMC4-3:1	SMC4	1.46598	2.76251	2.32337e-05	0.000867168	up	5.04342	4.29272	1.62781	1.74036
lnc-IGFBP3-1:1	IGFBP3	1.4628	2.75643	5.10974e-22	2.21593e-19	up	44.6815	49.0828	16.9293	17.0555
lnc-KCNE1B-3:2	KCNE1B	1.4507	2.73341	0.000154946	0.00407829	up	3.27586	3.6318	1.20923	1.30527
lnc-TBRG4-6:1	TBRG4	1.43644	2.70652	1.07325e-24	5.14428e-22	up	53.2711	50.8646	19.3942	19.057
lnc-ANKRD33B-2:1	ANKRD33B	1.42988	2.69425	4.6142e-08	3.62254e-06	up	9.4564	11.9062	3.95326	3.95932
lnc-TSPAN19-1:2	TSPAN19	1.41819	2.6725	3.91887e-05	0.001357	up	5.11276	5.4153	2.2529	1.68249
lnc-OR7C1-2:1	OR7C1	1.41459	2.66583	0.00150282	0.0267831	up	2.91572	3.80675	1.06971	1.4358
lnc-PGGT1B-1:1	PGGT1B	1.41058	2.65843	0.000349854	0.0080866	up	4.01897	4.58268	1.91571	1.31571
lnc-DUSP4-6:1	DUSP4	1.39475	2.62943	5.61524e-25	3.00811e-22	up	65.722	64.9577	25.3939	24.278
lnc-CPXM2-4:1	CPXM2	1.38844	2.61796	0.000402533	0.00911906	up	3.78256	4.94067	1.48829	1.82738
lnc-SLC39A8-1:9	SLC39A8	1.36597	2.5775	8.23352e-05	0.00249112	up	4.17579	4.71956	1.60363	1.8326
lnc-ZNF717-4:6	ZNF717	1.36566	2.57694	0.00397418	0.0592354	up	6.07259	8.60811	1.90966	3.7644
lnc-TGFBR2-1:1	TGFBR2	1.35632	2.56032	5.57346e-06	0.000253788	up	6.86771	5.93448	2.30824	2.67711
lnc-LYPD8-1:12	LYPD8	1.34374	2.53808	0.00494125	0.0690183	up	3.34757	3.46252	0.959015	1.70599
NUTM2A-AS1:24	NUTM2A	1.33477	2.52235	6.3483e-10	6.72255e-08	up	12.4249	14.136	5.00623	5.50085
lnc-HAPLN3-3:1	HAPLN3	1.33457	2.522	0.000306639	0.00721591	up	8.19555	5.83161	2.32545	3.21967
lnc-C2orf83-1:1	C2orf83	1.32877	2.51188	2.80056e-08	2.27721e-06	up	9.53521	8.66643	3.53468	3.69827
lnc-SLC36A1-5:2	SLC36A1	1.31449	2.48715	5.4895e-07	3.3779e-05	up	18.6197	13.5747	6.64381	6.29184
lnc-IZUMO2-2:1	IZUMO2	1.28919	2.4439	0.00285254	0.0450226	up	3.21124	4.59564	1.41294	1.7656
lnc-ATP5PF-3:1	ATP5PF	1.28915	2.44384	0.00100526	0.0189936	up	4.17658	3.32078	1.58131	1.47931
H19:16	H19	1.27656	2.4226	7.4692e-06	0.000323914	up	7.02374	7.35512	3.35283	2.58009
lnc-SNF8-1:2	SNF8	1.27223	2.41535	0.00207409	0.0349472	up	5.5249	5.71498	1.65805	2.97384
lnc-GPR75-ASB3-5:1	GPR75-ASB3	1.26926	2.41039	0.00594662	0.0798759	up	2.20649	2.26785	1.0232	0.826672
lnc-PBDC1-8:1	PBDC1	1.25678	2.38961	0.00354963	0.0538624	up	3.30974	2.85668	1.48875	1.08816
lnc-SLC25A17-1:2	SLC25A17	1.25606	2.38843	0.000564282	0.0120068	up	7.0923	4.86616	2.42498	2.57225
TMCC1-AS1:10	TMCC1	1.25409	2.38516	0.000519002	0.0112004	up	4.26641	5.78464	2.06174	2.13847
lnc-ANXA2R-8:6	ANXA2R	1.23953	2.36122	1.62762e-11	2.36855e-09	up	14.3422	14.2453	6.04477	6.04776
lnc-TGM1-1:1	TGM1	1.2307	2.3468	0.00169788	0.0293966	up	3.15213	3.40178	1.25574	1.52282
lnc-BCL2-1:2	BCL2	1.21635	2.32358	3.85314e-05	0.00133933	up	5.75265	5.9936	2.74403	2.30598
lnc-KCNK7-7:2	KCNK7	1.21392	2.31966	2.72906e-05	0.000994142	up	5.45319	5.80003	2.37847	2.46
lnc-SYF2-3:2	SYF2	1.2104	2.31402	2.39205e-05	0.000885545	up	6.06234	7.15264	2.79845	2.8977
lnc-THAP12-4:1	THAP12	1.20487	2.30517	0.000854516	0.0169544	up	6.38307	4.69769	2.13941	2.65405
lnc-ZNFX1-2:1	ZNFX1	1.18927	2.28038	0.000903922	0.0176653	up	7.77789	6.89021	3.97419	2.45957
FGD5-AS1:21	FGD5	1.18882	2.27967	0.00619745	0.0826357	up	9.96469	5.68906	2.81751	4.03416
lnc-LARP1B-1:29	LARP1B	1.18522	2.27398	0.000343841	0.0079934	up	5.51466	7.05787	3.09331	2.42911
lnc-ANXA3-8:1	ANXA3	1.18021	2.2661	1.82998e-10	2.19285e-08	up	35.9343	31.0209	13.7202	15.7938
lnc-ZDHHC1-2:1	ZDHHC1	1.1636	2.24016	0.000866719	0.0171219	up	3.94017	4.04973	1.90687	1.65334
lnc-PUM3-2:1	PUM3	1.16168	2.23718	0.00354544	0.0538624	up	3.30974	2.83481	1.25574	1.47931
lnc-LNX2-2:2	LNX2	1.15952	2.23383	0.00498479	0.0692019	up	2.79594	2.56591	1.19063	1.20085
lnc-SMIM11B-3:1	SMIM11B	1.15641	2.22902	1.01823e-15	2.50621e-13	up	1498.45	1667.92	703.076	716.681
lnc-TSC22D2-1:4	TSC22D2	1.14978	2.2188	0.00428116	0.0621944	up	4.7282	3.35966	1.67665	1.95791
lnc-SNAPC5-3:5	SNAPC5	1.12813	2.18575	6.96134e-11	9.18796e-09	up	51.8802	56.3447	26.811	22.6843
TMEM161B-AS1:52	TMEM161B	1.11953	2.17276	0.00285079	0.0450226	up	3.53039	3.46495	1.42364	1.7817
lnc-TRPC7-6:1	TRPC7	1.10223	2.14686	0.00153115	0.0271288	up	3.78256	4.04973	1.72083	1.9144
lnc-IL13RA2-1:1	IL13RA2	1.07962	2.11347	1.83501e-07	1.28639e-05	up	11.5841	12.2302	5.95315	5.3081
lnc-PEF1-3:4	PEF1	1.0725	2.10307	0.00261195	0.0420265	up	5.76762	5.79841	3.34586	2.15413
lnc-DDX47-3:1	DDX47	1.06375	2.09036	3.91087e-07	2.50819e-05	up	14.2634	17.0089	7.767	7.17899
lnc-ICAM2-1:5	ICAM2	1.05774	2.08167	0.000726957	0.0147448	up	4.83537	5.02167	2.16639	2.55311
lnc-IGIP-2:2	IGIP	1.05126	2.07234	3.60732e-05	0.00126182	up	8.30351	8.38295	4.45324	3.59733
lnc-ADAMTS1-2:1	ADAMTS1	1.04746	2.06689	1.08788e-11	1.65123e-09	up	30.8909	28.1861	14.6038	13.9664
lnc-FAM84B-15:24	FAM84B	1.0255	2.03567	0.00162094	0.0283338	up	5.11513	4.72361	2.14081	2.67668
lnc-ST8SIA4-7:1	ST8SIA4	1.02476	2.03462	4.93843e-13	8.32857e-11	up	87.7854	96.4922	44.783	45.7241
lnc-VPS13A-2:1	VPS13A	1.01524	2.02124	0.00381054	0.0570472	up	3.86136	4.04973	1.76734	2.13194
OTUD6B-AS1:9	OTUD6B	1.01524	2.02124	0.000438095	0.00984331	up	17.0625	13.6849	8.966	6.2479
lnc-ENC1-5:1	ENC1	1.01458	2.02032	1.18842e-09	1.20255e-07	up	25.4291	27.1535	13.8927	12.126
lnc-TXNRD2-2:1	TXNRD2	1.01379	2.01921	0.00486831	0.0686311	up	3.38854	3.80675	1.81385	1.74036
lnc-EPGN-4:2	EPGN	1.004	2.00556	0.000193882	0.00501614	up	6.20261	5.96445	2.97983	3.07565
lnc-TATDN3-1:1	TATDN3	1.00059	2.00082	0.00444818	0.0638953	up	4.41299	5.26465	2.74403	2.08843
DHRS4-AS1:13	DHRS4	-1.00297	0.49897	0.000887698	0.0174606	down	3.58477	4.54218	9.12878	7.16463
lnc-SLITRK5-18:1	SLITRK5	-1.00638	0.497792	0.000526583	0.0113371	down	3.97405	3.17175	7.74561	6.63382
OLMALINC:1	OLMALINC	-1.02207	0.49241	4.38786e-14	8.68702e-12	down	71.7899	66.6586	138.55	142.492
lnc-UBE2E2-6:1	UBE2E2	-1.02324	0.49201	5.09283e-14	9.86817e-12	down	33.6333	31.5555	66.5139	65.9414
MYOSLID:14	MYOSLID	-1.02917	0.48999	0.00580678	0.0785771	down	2.60051	1.81428	4.22953	4.79687
lnc-VPREB1-7:3	VPREB1	-1.03409	0.488325	0.00412589	0.0608001	down	2.66434	3.8845	5.80618	7.59276
lnc-ALDOC-2:5	ALDOC	-1.03524	0.487936	0.00197989	0.0337656	down	2.20649	2.02487	4.51137	4.17687
lnc-ZNF717-4:9	ZNF717	-1.03651	0.487505	0.0040095	0.0596642	down	2.6738	2.02649	5.32202	4.34394
lnc-NPIPB15-6:1	NPIPB15	-1.04296	0.48533	2.95133e-06	0.000146873	down	7.40752	6.31758	15.2084	13.0962
LRRC75A-AS1:78	LRRC75A	-1.04921	0.483232	0.000126687	0.00346468	down	5.45477	7.88159	14.4703	13.1132
lnc-WDR63-5:1	WDR63	-1.05662	0.480757	3.2307e-13	5.65807e-11	down	31.2849	32.7218	69.3914	63.6972
lnc-MAK16-6:1	MAK16	-1.06184	0.479022	1.09416e-05	0.000455	down	7.46583	10.0952	17.2883	19.3389
lnc-ELOVL5-3:1	ELOVL5	-1.07699	0.474015	7.55236e-15	1.6376e-12	down	25.6899	26.8983	54.4843	56.3977
SNHG6:19	SNHG6	-1.117	0.461051	4.78361e-07	2.9775e-05	down	5.09779	5.02329	11.6263	10.3421
lnc-CHRDL2-3:1	CHRDL2	-1.13282	0.456023	5.53133e-16	1.67913e-13	down	20.1264	21.1339	45.2528	45.1846
lnc-TBX2-2:1	TBX2	-1.13309	0.455939	0.00352259	0.0537357	down	1.57607	1.5389	3.67421	3.17616
lnc-RPS6KA3-3:1	RPS6KA3	-1.13878	0.454144	0.000210152	0.00530154	down	2.99453	2.34884	6.04617	5.74319
lnc-VLDLR-4:1	VLDLR	-1.14264	0.45293	0.000697714	0.0144084	down	2.4429	1.94387	4.74392	4.96003
lnc-NREP-1:2	NREP	-1.14327	0.452733	0.00623525	0.082897	down	1.11664	1.27891	2.6045	2.69756
lnc-DNM1L-5:1	DNM1L	-1.1502	0.450563	6.64713e-16	1.8433e-13	down	15.3123	15.2319	34.3408	33.438
lnc-PXMP4-5:1	PXMP4	-1.16158	0.447024	6.65435e-18	2.42405e-15	down	32.7657	34.0834	73.3084	76.1547
lnc-PDK3-1:1	PDK3	-1.19267	0.437493	2.69681e-11	3.77844e-09	down	7.24991	7.69449	16.7432	17.4036
lnc-SHANK2-7:1	SHANK2	-1.22103	0.428978	4.28184e-06	0.000202045	down	3.52881	4.23926	8.3879	9.71035
lnc-KATNAL1-5:1	KATNAL1	-1.23384	0.425184	0.000897269	0.0176108	down	1.67063	2.38124	4.55183	4.9783
lnc-TMEM88B-6:3	TMEM88B	-1.23629	0.424462	0.00208888	0.0350986	down	1.29474	1.73005	3.71979	3.41677
lnc-HMGN1-1:10	HMGN1	-1.24049	0.423229	0.002811	0.0445214	down	1.34675	1.30077	3.41655	2.86072
lnc-SFPQ-2:2	SFPQ	-1.24443	0.422073	3.18811e-08	2.54685e-06	down	7.00956	6.00413	16.6665	14.1961
lnc-EPN2-3:2	EPN2	-1.24943	0.420614	2.02396e-09	1.98196e-07	down	63.7212	54.4503	124.407	156.407
LINC00707:16	LINC00707	-1.25379	0.419345	0.00427635	0.0621944	down	1.32784	1.41822	3.81281	2.7576
lnc-ICOSLG-11:1	ICOSLG	-1.25725	0.418341	5.12009e-13	8.47795e-11	down	8.4493	7.74795	19.597	19.1357
lnc-TNFAIP8L1-2:1	TNFAIP8L1	-1.26334	0.416578	0.00106086	0.0197127	down	1.49726	1.37691	3.34865	3.56774
lnc-SOX11-1:5	SOX11	-1.27678	0.412716	0.00105207	0.0196318	down	1.89128	1.61989	4.83693	3.69827
lnc-NDRG1-1:1	NDRG1	-1.28951	0.409089	2.39202e-15	5.73267e-13	down	9.3776	8.90941	22.6964	22.0156
lnc-GOLGA8H-119:8	GOLGA8H	-1.30343	0.405161	0.00382111	0.0570472	down	1.65487	1.05293	3.58119	3.13265
lnc-LRR1-1:1	LRR1	-1.30501	0.40472	0.000934832	0.0180371	down	48.6603	29.3994	119.503	73.3254
lnc-HPGDS-3:1	HPGDS	-1.31662	0.401473	0.00113166	0.0208624	down	1.57607	1.29591	3.86583	3.31495
MIR100HG:88	MIR100HG	-1.33892	0.395316	0.00410092	0.0606283	down	0.918059	1.28215	3.06262	2.51917
lnc-WDHD1-4:1	WDHD1	-1.33988	0.395054	5.78285e-08	4.3887e-06	down	3.30974	3.23979	8.37162	8.22321
DNM3OS:4	DNM3OS	-1.36981	0.386942	0.00774222	0.0993076	down	0.60521	0.769449	1.74455	1.82433
lnc-CXCL6-3:1	CXCL6	-1.37761	0.384855	1.55721e-09	1.54147e-07	down	4.7282	4.13073	11.9528	11.0948
OLMALINC:2	OLMALINC	-1.38813	0.38206	2.11293e-08	1.78171e-06	down	4.41299	3.72656	10.0413	11.2797
lnc-EIF6-1:16	EIF6	-1.40393	0.377899	1.83629e-07	1.28639e-05	down	2.75812	3.0778	7.44144	8.00566
lnc-ZNF705D-2:51	ZNF705D	-1.42637	0.372065	0.00676321	0.088495	down	0.588661	0.793748	1.75385	1.97705
lnc-COA6-10:1	COA6	-1.42788	0.371678	0.00552886	0.0754893	down	0.900722	0.60989	2.14592	1.94877
GAS5:81	GAS5	-1.44676	0.366845	5.67517e-08	4.34317e-06	down	2.79437	3.39287	8.593	8.27847
lnc-SYNRG-4:1	SYNRG	-1.44793	0.366548	7.22862e-06	0.000316808	down	2.83692	4.13073	8.51114	10.4857
lnc-ZBTB16-1:1	ZBTB16	-1.4612	0.363191	0.00204	0.034661	down	1.26085	1.13393	2.65101	3.95932
lnc-VCP-3:2	VCP	-1.47202	0.360477	0.000358076	0.0082141	down	1.26085	2.10586	4.55788	4.78599
lnc-GAPDH-2:1	GAPDH	-1.51096	0.350878	0.000344067	0.0079934	down	1.15447	1.64905	3.64816	4.3496
lnc-ANKRD20A8P-12:6	ANKRD20A8P	-1.53015	0.346242	0.00105413	0.0196318	down	1.29395	2.5165	6.16895	4.84517
lnc-MED9-2:1	MED9	-1.55633	0.340015	0.00153865	0.0272087	down	0.70923	0.809946	2.13941	2.34949
lnc-SIX1-2:1	SIX1	-1.58854	0.332507	0.00529552	0.0728494	down	0.630427	0.404973	1.58131	1.56633
lnc-HEATR6-1:9	HEATR6	-1.60188	0.329447	0.00137135	0.0247304	down	1.08197	1.79484	5.28761	3.46462
lnc-FBXL5-10:1	FBXL5	-1.61141	0.327279	9.67671e-27	6.2947e-24	down	10.8457	11.4202	33.8585	34.1546
lnc-ATRN-4:4	ATRN	-1.64847	0.318978	0.00212865	0.0356354	down	0.576841	0.631758	2.03058	1.78779
lnc-EFCAB2-4:1	EFCAB2	-1.67078	0.314083	2.29681e-26	1.39447e-23	down	42.2827	48.8633	143.438	146.593
lnc-IGFBP7-1:1	IGFBP7	-1.68535	0.310927	3.85112e-06	0.000186554	down	1.89128	3.17904	8.69718	7.61408
GAS5:39	GAS5	-1.69324	0.309232	0.000147958	0.0039356	down	2.12139	1.19548	6.05594	4.71899
lnc-JAK1-2:2	JAK1	-1.81775	0.283663	0.00605694	0.0809994	down	0.47282	0.242984	1.30225	1.26437
lnc-SPRED2-10:1	SPRED2	-1.83236	0.280804	0.0050799	0.0703079	down	0.835316	0.319929	2.32824	1.83608
SLC16A1-AS1:29	SLC16A1	-1.85286	0.276843	6.95282e-05	0.00217515	down	0.799066	0.890941	3.39051	2.75021
lnc-ANKRD20A8P-12:1	ANKRD20A8P	-1.87712	0.272227	1.86566e-11	2.65477e-09	down	2.09459	2.50516	8.62091	8.29456
lnc-ARHGAP29-7:1	ARHGAP29	-1.8823	0.271251	0.00161561	0.0282949	down	0.551624	0.566963	1.67432	2.48002
LMO7-AS1:7	LMO7	-1.90508	0.267001	0.00118373	0.0217344	down	0.855016	0.383915	2.42312	2.269
FTX:48	FTX	-1.91641	0.264913	8.78412e-06	0.000375573	down	1.27189	0.91281	4.503	3.79486
lnc-UBLCP1-10:1	UBLCP1	-1.93865	0.260861	0.000631509	0.0131605	down	0.683225	0.390394	1.92733	2.23462
lnc-MON2-2:2	MON2	-1.94599	0.259537	1.52001e-05	0.000609811	down	3.92677	2.06698	13.8797	9.27613
lnc-DPH5-1:5	DPH5	-1.95129	0.258585	0.00759919	0.0977294	down	0.546107	0.170899	1.37481	1.44972
lnc-PPA2-1:2	PPA2	-1.98206	0.253129	0.00116607	0.0214533	down	0.315213	0.404973	1.40225	1.47931
lnc-STAC-2:1	STAC	-2.07397	0.237504	6.01802e-09	5.48072e-07	down	1.50593	2.2395	7.1275	8.6509
lnc-DLK1-35:101	DLK1	-2.13419	0.227795	0.00706491	0.0915223	down	0.187552	0.461669	1.09622	1.78692
SNHG18:11	SNHG18	-2.16279	0.223324	0.00685013	0.0891202	down	0.134754	0.657677	1.69014	1.88873
lnc-GNAT3-3:1	GNAT3	-2.25179	0.209963	0.00193166	0.033005	down	0.47282	0.161989	1.30225	1.78387
lnc-MRPL57-5:7	MRPL57	-2.25442	0.209581	9.274e-05	0.00270724	down	0.315213	0.45681	1.81943	1.90874
lnc-CLDN23-8:2	CLDN23	-2.26683	0.207786	0.000728823	0.0147498	down	0.315213	0.242984	1.39527	1.34878
LINC00504:8	LINC00504	-2.32905	0.199015	0.00289046	0.0454188	down	0.19622	0.200057	1.09343	0.955894
lnc-WDFY1-1:1	WDFY1	-2.33374	0.198369	0.0033765	0.0518546	down	0.157607	0.242984	1.11622	0.957199
LINC00641:5	LINC00641	-2.3532	0.195711	6.51322e-08	4.90214e-06	down	1.93383	1.05212	6.56381	8.76577
lnc-PJVK-2:16	PJVK	-2.42919	0.185669	0.000971472	0.0184701	down	0.152879	0.481918	1.51015	1.95138
lnc-ANKRD65-4:2	ANKRD65	-2.47348	0.180056	0.00261858	0.0420576	down	0.0788034	0.323979	1.02087	1.26524
lnc-ISCU-1:4	ISCU	-2.51167	0.175353	0.000930423	0.0179926	down	0.378256	0.135261	1.20923	1.79475
lnc-MIOX-1:1	MIOX	-2.65404	0.158875	0.00167217	0.0290066	down	0.157607	0.242984	0.976689	1.60983
lnc-VCX3A-5:1	VCX3A	-2.70458	0.153405	0.00129975	0.0236263	down	0.0788034	0.242984	1.20923	0.957199
lnc-PIK3R4-3:3	PIK3R4	-2.90731	0.133294	0.00566556	0.0770094	down	0.0788034	0.0809946	0.642289	0.649155
lnc-FAM155B-3:1	FAM155B	-2.91564	0.132527	3.55305e-05	0.00126182	down	0.41687	0.130401	2.41335	1.83217
lnc-PGGT1B-1:3	PGGT1B	-2.99343	0.125571	0.00572768	0.0777377	down	0	0.277002	1.33992	0.946757
ZNF710-AS1:6	ZNF710	-2.99424	0.1255	0.00435295	0.0630243	down	0.300241	0	1.28225	1.23131
LINC02511:6	LINC02511	-2.99717	0.125245	0.00329923	0.0508394	down	0.23641	0.00323979	1.16272	0.870181
FGD5-AS1:22	FGD5	-3.02434	0.122909	0.000208981	0.00528664	down	0.38456	1.726	5.74665	11.4781
lnc-ZSCAN10-3:13	ZSCAN10	-3.10004	0.116626	0.00751929	0.0969946	down	0.193856	0	0.741353	1.04422
LINC01050:5	LINC01050	-3.10717	0.116051	0.00664499	0.0871576	down	0	0.187908	0.921343	0.790124
lnc-TRIM38-2:2	TRIM38	-3.10778	0.116002	0.00287845	0.045353	down	0.335702	0	1.77664	1.25132
SGMS1-AS1:22	SGMS1	-3.15417	0.112331	0.00594252	0.0798759	down	0	0.430082	1.52317	2.38952
lnc-COPZ1-3:2	COPZ1	-3.1806	0.110292	0.00163717	0.0285627	down	0.0788034	0.0809946	0.898089	0.667864
CFAP58-DT:8	CFAP58-DT	-3.19666	0.109071	0.00425212	0.0621574	down	0	0.182238	0.866928	0.901942
LINC02454:22	LINC02454	-3.21212	0.107908	0.00472692	0.0669488	down	0	0.195197	0.789723	1.11644
CARMN:6	CARMN	-3.25632	0.104653	0.000930547	0.0179926	down	0.231682	0	1.02413	1.33268
lnc-SLC39A11-1:12	SLC39A11	-3.28358	0.102694	8.74206e-06	0.000375538	down	0.103232	0.686835	4.03279	3.7396
LINC00987:1	LINC00987	-3.31127	0.100742	6.88176e-16	1.8433e-13	down	0.591025	0.688454	6.79031	6.026
LINC00987:2	LINC00987	-3.31127	0.100742	6.88176e-16	1.8433e-13	down	0.591025	0.688454	6.79031	6.026
FGF14-AS2:2	FGF14	-3.34099	0.0986876	0.00118894	0.0217861	down	0.221437	0	1.44178	0.957199
SEC24B-AS1:10	SEC24B	-3.3471	0.0982702	0.00376197	0.0567222	down	0.183612	0	0.780886	1.23566
lnc-NT5M-1:4	NT5M	-3.37684	0.0962652	0.000440737	0.0098619	down	0.237198	0	1.3576	1.26698
lnc-GAPDH-2:2	GAPDH	-3.40458	0.094432	3.82398e-19	1.51413e-16	down	0.894418	0.618799	7.60701	8.57259
lnc-CCDC125-1:7	CCDC125	-3.40792	0.0942135	0.00381834	0.0570472	down	0	0.132021	0.766468	0.756187
lnc-VPS33B-8:1	VPS33B	-3.43204	0.0926517	0.00280256	0.044465	down	0.116629	0	0.778095	0.636537
lnc-FRG2-13:3	FRG2	-3.46681	0.0904456	0.00516437	0.0711527	down	0.104808	0	0.744144	0.573449
LINC01572:24	LINC01572	-3.47846	0.0897181	0.000958236	0.0183333	down	0	0.171709	0.819953	1.21564
lnc-IRX3-80:22	IRX3	-3.50731	0.0879416	0.00101594	0.0191556	down	0	0.288341	2.19941	1.20085
SNHG1:42	SNHG1	-3.54505	0.085671	0.00488425	0.0686998	down	0	0.820476	5.07413	4.61718
LINC01812:9	LINC01812	-3.54647	0.0855868	0.00466128	0.0663286	down	0	0.0980035	0.697635	0.587807
LINC00472:69	LINC00472	-3.55389	0.0851476	0.00144016	0.0258689	down	0.135542	0	0.791583	0.971122
MIR17HG:22	MIR17HG	-3.60019	0.0824584	0.000100543	0.00284363	down	0.378256	0	2.22871	2.55572
lnc-GPR183-47:6	GPR183	-3.60385	0.0822495	0.0023992	0.0394395	down	0	0.115822	0.619035	0.930658
lnc-CTDSP2-2:6	CTDSP2	-3.61117	0.0818332	0.000447765	0.00994585	down	0	0.534565	3.3533	3.29494
lnc-ASPHD1-1:4	ASPHD1	-3.64853	0.0797411	0.00356046	0.0538624	down	0.113477	0	1.04366	0.563007
ADAMTS9-AS2:14	ADAMTS9	-3.7636	0.073628	0.00665142	0.0871576	down	0.0803794	0	0.505088	0.777942
lnc-SNRPN-8:134	SNRPN	-3.78802	0.0723923	0.000318634	0.00745965	down	0	0.15632	1.39434	0.926307
lnc-SPRED2-22:1	SPRED2	-3.80325	0.0716321	0.00488827	0.0686998	down	0.0788034	0	0.558108	0.739654
LURAP1L-AS1:3	LURAP1L	-3.80435	0.0715777	6.97424e-05	0.00217515	down	0.194644	0	1.70083	1.23653
LINC01515:39	LINC01515	-3.92354	0.0659017	0.00125951	0.0229868	down	0.119781	0	1.40085	0.642629
NIFK-AS1:20	NIFK	-3.94241	0.0650453	0.00555451	0.0757259	down	0	0.076135	0.517645	0.84277
lnc-VKORC1L1-5:6	VKORC1L1	-4.00375	0.0623379	0.00130803	0.0236823	down	0	0.0947637	0.64787	1.06728
LINC00471:9	LINC00471	-4.12292	0.0573954	0.00176632	0.0305235	down	0	0.0809946	1.0232	0.609127
lnc-DLK1-35:134	DLK1	-4.28688	0.0512294	5.5213e-05	0.00178941	down	0.135542	0.0186288	2.24359	1.06032
MALAT1:38	MALAT1	-4.33466	0.0495609	0.00151444	0.0269374	down	0	0.480298	7.65352	2.26465
lnc-ZCCHC7-2:24	ZCCHC7	-4.41799	0.0467791	0.000220454	0.00548544	down	0.751784	0	6.3508	10.0715
GAS5:58	GAS5	-4.73634	0.0375162	1.45558e-07	1.04377e-05	down	0.145786	0	2.55706	1.74645
lnc-EFHD1-2:1	EFHD1	-4.77763	0.0364579	0.000981363	0.0185806	down	0	0.0348277	0.578107	0.743134
lnc-TAOK3-1:6	TAOK3	-4.84825	0.0347162	2.08986e-07	1.45285e-05	down	0.110325	0	2.04267	1.57633
lnc-EPN2-3:3	EPN2	-4.85614	0.0345267	6.8117e-08	5.08477e-06	down	3.08279	16.1568	261.924	295.289
lnc-ANXA2R-1:5	ANXA2R	-4.93938	0.032591	1.8358e-07	1.28639e-05	down	0.121357	0	2.51102	1.68728
SNHG18:5	SNHG18	-5.1847	0.0274947	2.53114e-06	0.000130972	down	0	0.0583161	1.39899	1.20346
lnc-KDM4C-5:10	KDM4C	-5.23348	0.0265806	0.000914578	0.0177971	down	0	0.0234884	0.570665	0.825802
MAGI2-AS3:41	MAGI2	-5.34458	0.0246105	3.25041e-05	0.00116541	down	0	0.0388774	0.822744	1.30266
JPX:33	JPX	-5.60235	0.0205837	2.6901e-07	1.82414e-05	down	0.0449179	0	1.45015	1.44407
SUCLG2-AS1:12	SUCLG2	-5.92341	0.0164769	0.00178003	0.0306441	down	0.00630427	0	0.562294	0.682657
HAND2-AS1:69	HAND2	-6.21347	0.013476	0.000831156	0.0165269	down	0	0	0.505088	0.547344
lnc-NPSR1-4:5	NPSR1	-6.24343	0.0131989	0.000809849	0.0161385	down	0	0	0.560898	0.514712
lnc-HIST1H2AI-3:5	HIST1H2AI	-6.29745	0.0127139	0.000598871	0.0125666	down	0	0	0.59485	0.522544
STAM-AS1:3	STAM	-6.31191	0.0125871	0.00059525	0.0125195	down	0	0	0.603687	0.525154
lnc-FYB2-3:2	FYB2	-6.36382	0.0121422	0.000443235	0.00989349	down	0	0	0.634383	0.536466
lnc-FBLN7-2:1	FBLN7	-6.36643	0.0121203	0.000475576	0.0104615	down	0	0	0.651126	0.522108
CARD8-AS1:3	CARD8	-6.4743	0.0112472	0.00020751	0.00526406	down	0	0	0.651126	0.613477
lnc-TFAP4-3:4	TFAP4	-6.47489	0.0112425	0.000204078	0.00522063	down	0	0	0.634848	0.630011
lnc-ZPLD1-8:1	ZPLD1	-6.51491	0.0109349	0.00035284	0.00813497	down	0	0	0.522761	0.776201
THUMPD3-AS1:91	THUMPD3	-6.57427	0.0104942	0.000133807	0.00361596	down	0	0	0.643219	0.712243
lnc-IRX3-80:5	IRX3	-6.60212	0.0102935	0.000306442	0.00721591	down	0	0	0.872974	0.512101
lnc-DCLRE1C-1:4	DCLRE1C	-6.61577	0.0101966	9.74634e-05	0.00279119	down	0	0	0.744144	0.652636
lnc-LSM3-2:1	LSM3	-6.64488	0.0099929	9.85921e-05	0.00280587	down	0	0	0.77577	0.650025
DICER1-AS1:9	DICER1	-6.64796	0.0099716	9.01599e-05	0.00268313	down	0	0	0.667869	0.759233
TMPO-AS1:10	TMPO	-6.69497	0.00965189	5.64511e-05	0.00182305	down	0	0	0.74833	0.727471
lnc-ZFHX4-6:7	ZFHX4	-6.69557	0.00964788	6.5166e-05	0.00205386	down	0	0	0.679961	0.795345
lnc-GINS1-2:3	GINS1	-6.72386	0.00946054	7.62434e-05	0.00233788	down	0	0	0.876694	0.630881
MAPKAPK5-AS1:13	MAPKAPK5	-6.72554	0.00944955	4.04032e-05	0.00138471	down	0	0	0.736702	0.770545
lnc-LLPH-21:4	LLPH	-6.73304	0.00940052	4.87482e-05	0.00161436	down	0	0	0.827395	0.689183
lnc-LRP5-1:9	LRP5	-6.73409	0.00939367	7.13876e-05	0.00221003	down	0	0	0.638103	0.876707
PCF11-AS1:19	PCF11	-6.73468	0.00938988	4.33618e-05	0.00146802	down	0	0	0.710192	0.806223
lnc-CRYBA4-52:50	CRYBA4	-6.76374	0.00920264	0.000179186	0.00466243	down	0	0	0.558108	0.987655
lnc-HIST4H4-1:2	HIST4H4	-6.76881	0.00917035	0.000195103	0.00503345	down	0	0	1.00134	0.555175
LINC00938:6	LINC00938	-6.77264	0.009146	3.33366e-05	0.00119057	down	0	0	0.845998	0.713113
MIR924HG:2	MIR924HG	-6.80608	0.00893644	7.90115e-05	0.00240655	down	0	0	0.971573	0.62566
LY6E-DT:26	LY6E-DT	-6.8096	0.00891469	8.69148e-05	0.00260373	down	0	0	0.615314	0.981129
lnc-DHX32-1:2	DHX32	-6.85601	0.00863245	0.000136779	0.00367446	down	0	0	0.875764	0.776636
DLGAP1-AS2:6	DLGAP1	-6.8686	0.00855745	9.58565e-05	0.00277455	down	0	0	0.860416	0.806223
LINC01426:1	LINC01426	-6.88483	0.00846175	0.000198406	0.00510418	down	0	0	0.534388	1.14777
NFYC-AS1:6	NFYC	-6.8952	0.00840113	0.000110467	0.00308132	down	0	0	0.585083	1.10948
THUMPD3-AS1:42	THUMPD3	-6.93348	0.00818115	1.64872e-05	0.000644415	down	0	0	0.740423	1.00114
lnc-EFCAB1-7:2	EFCAB1	-6.93908	0.00814943	0.000125852	0.00345222	down	0	0	0.572526	1.17474
KCTD21-AS1:17	KCTD21	-6.93997	0.00814441	1.55389e-05	0.000617268	down	0	0	1.0032	0.750096
lnc-LTBP3-2:3	LTBP3	-6.94764	0.00810126	6.18871e-17	2.16772e-14	down	0	0.0575062	4.02628	4.73117
lnc-RGPD8-5:4	RGPD8	-6.97316	0.00795919	4.52096e-05	0.00151928	down	0	0	1.14273	0.652636
lnc-VIP-1:5	VIP	-6.99064	0.00786335	4.05971e-05	0.00138471	down	0	0	0.888787	0.925437
OIP5-AS1:23	OIP5	-7.07787	0.00740199	3.19733e-14	6.61775e-12	down	0.0441299	0	3.31563	4.64546
LINC01000:2	LINC01000	-7.10095	0.00728451	0.000153866	0.00406162	down	0	0	1.39853	0.564747
lnc-AK5-1:7	AK5	-7.1044	0.00726713	7.66578e-05	0.00234269	down	0	0	0.618104	1.34312
lnc-C19orf12-12:2	C19orf12	-7.10987	0.00723964	5.44266e-05	0.0017708	down	0	0	1.18458	0.790124
ZFAS1:29	ZFAS1	-7.12193	0.00717937	2.00618e-05	0.000758103	down	0	0	0.713448	1.2722
GSEC:11	GSEC	-7.14202	0.00708009	4.02995e-05	0.00138471	down	0	0	0.666474	1.34704
TMEM161B-AS1:60	TMEM161B	-7.22095	0.00670312	4.2501e-06	0.000201592	down	0	0	1.10273	1.02899
ZKSCAN2-DT:12	ZKSCAN2-DT	-7.23142	0.00665468	3.57719e-05	0.00126182	down	0.0023641	0	0.686473	1.81607
lnc-DLK1-35:132	DLK1	-7.23287	0.00664796	3.98175e-06	0.000190852	down	0	0	1.04413	1.10426
SNHG12:17	SNHG12	-7.23435	0.00664114	4.67472e-06	0.000216105	down	0	0	1.00878	1.14124
lnc-GRHL2-12:1	GRHL2	-7.25847	0.00653105	5.09373e-05	0.00167472	down	0	0	1.54038	0.650895
lnc-SLC6A18-2:5	SLC6A18	-7.27994	0.00643458	4.58e-06	0.000212807	down	0	0	1.22784	0.994617
lnc-EGLN1-1:10	EGLN1	-7.32448	0.00623894	5.62323e-06	0.00025478	down	0	0	0.973433	1.31484
TMEM72-AS1:13	TMEM72	-7.39529	0.00594011	1.90328e-05	0.000729323	down	0	0	0.87995	1.52325
LINC01184:23	LINC01184	-7.40933	0.00588262	1.04313e-05	0.00043778	down	0	0	1.64967	0.784468
HOXA11-AS:16	HOXA11-AS	-7.42392	0.00582341	5.98687e-05	0.00190638	down	0	0	0.634383	1.81694
LINC01089:10	LINC01089	-7.44386	0.00574348	4.80611e-07	2.9775e-05	down	0	0	1.2576	1.23218
LINC00662:48	LINC00662	-7.46928	0.00564317	2.00343e-06	0.000105464	down	0	0	1.06599	1.46538
lnc-NUDT3-1:1	NUDT3	-7.47617	0.00561627	1.95875e-05	0.000743264	down	0	0	0.736702	1.80563
EMX2OS:4	EMX2OS	-7.48827	0.00556938	4.32459e-07	2.72806e-05	down	0	0	1.35992	1.20912
LINC01138:7	LINC01138	-7.54555	0.00535258	2.70407e-07	1.82414e-05	down	0	0	1.4348	1.23914
MIR155HG:7	MIR155HG	-7.55265	0.00532629	3.95185e-07	2.51675e-05	down	0	0	1.2004	1.48322
TPT1-AS1:51	TPT1	-7.67327	0.00489908	8.52819e-08	6.22533e-06	down	0	0	1.58596	1.33703
ID2-AS1:18	ID2	-7.68728	0.00485175	9.49107e-07	5.4022e-05	down	0	0	1.1497	1.79649
HAS2-AS1:12	HAS2	-7.69128	0.00483833	2.26076e-06	0.000118326	down	0	0	0.93018	2.02361
MAPKAPK5-AS1:26	MAPKAPK5	-7.69404	0.00482908	7.03593e-06	0.000312567	down	0	0	2.12127	0.846686
SCAMP1-AS1:9	SCAMP1	-7.83823	0.00436975	1.1283e-09	1.15454e-07	down	0	0.00161989	1.73572	1.90526
lnc-AMN1-2:5	AMN1	-7.85652	0.00431471	2.45061e-07	1.69073e-05	down	0	0	2.03477	1.28787
lnc-DLK1-35:122	DLK1	-7.86637	0.00428534	7.31871e-06	0.000318907	down	0	0	2.32405	1.02203
ZNF561-AS1:7	ZNF561	-7.93052	0.00409899	9.95666e-07	5.63201e-05	down	0	0	1.19761	2.29206
lnc-TMEM218-1:6	TMEM218	-7.96059	0.00401443	7.4362e-07	4.36913e-05	down	0	0	1.2297	2.33382
lnc-COL9A2-1:3	COL9A2	-7.9856	0.00394543	1.26403e-08	1.09633e-06	down	0	0	2.11662	1.5176
lnc-SLC7A7-1:7	SLC7A7	-8.02862	0.00382952	5.68574e-09	5.28368e-07	down	0	0	1.58084	2.15674
ZBED5-AS1:7	ZBED5	-8.11588	0.00360477	1.62164e-10	1.99572e-08	down	0	0	2.00268	1.9727
lnc-H2BFWT-18:2	H2BFWT	-8.15217	0.00351521	8.42015e-07	4.88422e-05	down	0	0	2.80124	1.28047
lnc-B3GNT10-21:20	B3GNT10	-8.17535	0.00345919	2.27732e-09	2.20633e-07	down	0	0	2.43661	1.71034
EIF1B-AS1:15	EIF1B	-8.2201	0.00335354	4.12278e-10	4.63533e-08	down	0	0	2.42079	1.85653
lnc-FKBP2-1:1	FKBP2	-8.24613	0.00329358	9.6332e-11	1.25328e-08	down	0	0	2.36173	1.99271
lnc-CCDC28A-1:4	CCDC28A	-8.37056	0.00302141	1.2077e-11	1.80303e-09	down	0	0	2.52311	2.22418
lnc-KCNE1B-1:1	KCNE1B	-8.39267	0.00297546	3.79834e-11	5.24113e-09	down	0	0	2.12872	2.68712
MIR210HG:3	MIR210HG	-8.60335	0.00257118	1.67323e-13	2.98786e-11	down	0	0	2.77194	2.80677
ZBED5-AS1:6	ZBED5	-8.67364	0.00244891	2.60646e-06	0.000133354	down	0	0	4.70857	1.15473
lnc-IRX3-80:42	IRX3	-8.76833	0.00229335	1.8346e-14	3.88551e-12	down	0	0	3.34818	2.91075
lnc-FBXL20-1:3	FBXL20	-8.90304	0.0020889	5.03963e-15	1.12122e-12	down	0	0	3.55096	3.32061
SUCLG2-AS1:13	SUCLG2	-9.0264	0.00191771	1.32885e-16	4.48216e-14	down	0.00315213	0	3.92768	5.21717
GABPB1-AS1:18	GABPB1	-9.89998	0.00104667	6.11566e-26	3.48096e-23	down	0	0	7.52469	6.20656
lnc-TMEM167B-1:2	TMEM167B	-10.0574	0.000938501	5.47369e-27	3.83453e-24	down	0	0	8.60509	6.71127
OTUD6B-AS1:5	OTUD6B	-10.3045	0.000790765	2.13079e-34	2.77216e-31	down	0	0	8.35348	9.81259
lnc-CDRT15L2-1:3	CDRT15L2	-11.8557	0.000269822	1.65172e-41	7.52112e-38	down	0	0	20.5523	32.7184
lnc-SNAPC5-3:4	SNAPC5	-13.9075	6.50756e-05	5.13493e-194	4.67638e-190	down	0	0	112.022	108.964
