# Supplementary material for: Overexpression of miR-10a-5p facilitates the progression of osteoarthritis
Source: Aging (Albany NY). 2020 Apr 13;12(7):5948–76. doi: 10.18632/aging.102989 (PMC7185093; doi:10.18632/aging.102989)
Supplement: Supplementary Table 14 [file aging-12-102989-s003..xlsx]

## Sheet: GO BP
Table S14:Detailed GO analysis(biological process) of parent genes of differentially expressed circRNAs.
databaseID	Description	type	geneRatio	bgRatio	pvalue	padj	qvalue	enrichScore	overlapGeneList	overlapGeneCount
GO:0002568	somatic diversification of T cell receptor genes	biological process	1/9	5/17913	0.0025099	0.0942669	0.061226	398.067	BCL11B	1
GO:0002681	somatic recombination of T cell receptor gene segments	biological process	1/9	5/17913	0.0025099	0.0942669	0.061226	398.067	BCL11B	1
GO:0033153	T cell receptor V(D)J recombination	biological process	1/9	5/17913	0.0025099	0.0942669	0.061226	398.067	BCL11B	1
GO:0035701	hematopoietic stem cell migration	biological process	1/9	6/17913	0.00301121	0.0942669	0.061226	331.722	BCL11B	1
GO:0021902	commitment of neuronal cell to specific neuron type in forebrain	biological process	1/9	7/17913	0.00351229	0.0942669	0.061226	284.333	BCL11B	1
GO:0031077	post-embryonic camera-type eye development	biological process	1/9	7/17913	0.00351229	0.0942669	0.061226	284.333	BCL11B	1
GO:0044806	G-quadruplex DNA unwinding	biological process	1/9	7/17913	0.00351229	0.0942669	0.061226	284.333	HNRNPA2B1	1
GO:0031053	primary miRNA processing	biological process	1/9	8/17913	0.00401315	0.0942669	0.061226	248.792	HNRNPA2B1	1
GO:0021877	forebrain neuron fate commitment	biological process	1/9	10/17913	0.0050142	0.0942669	0.061226	199.033	BCL11B	1
GO:0090336	positive regulation of brown fat cell differentiation	biological process	1/9	10/17913	0.0050142	0.0942669	0.061226	199.033	METRNL	1
GO:0003334	keratinocyte development	biological process	1/9	12/17913	0.00601435	0.0951625	0.0618076	165.861	BCL11B	1
GO:0033151	V(D)J recombination	biological process	1/9	14/17913	0.00701361	0.0951625	0.0618076	142.167	BCL11B	1
GO:0048569	post-embryonic animal organ development	biological process	1/9	14/17913	0.00701361	0.0951625	0.0618076	142.167	BCL11B	1
GO:0008340	determination of adult lifespan	biological process	1/9	16/17913	0.00801198	0.0951625	0.0618076	124.396	PRDM2	1
GO:0090335	regulation of brown fat cell differentiation	biological process	1/9	16/17913	0.00801198	0.0951625	0.0618076	124.396	METRNL	1
GO:0021756	striatum development	biological process	1/9	19/17913	0.00950785	0.0951625	0.0618076	104.754	BCL11B	1
GO:0048025	negative regulation of mRNA splicing, via spliceosome	biological process	1/9	19/17913	0.00950785	0.0951625	0.0618076	104.754	HNRNPA2B1	1
GO:0048240	sperm capacitation	biological process	1/9	23/17913	0.0114992	0.0951625	0.0618076	86.5362	ABHD2	1
GO:0014850	response to muscle activity	biological process	1/9	24/17913	0.0119965	0.0951625	0.0618076	82.9306	METRNL	1
GO:0033119	negative regulation of RNA splicing	biological process	1/9	24/17913	0.0119965	0.0951625	0.0618076	82.9306	HNRNPA2B1	1
GO:0021544	subpallium development	biological process	1/9	25/17913	0.0124936	0.0951625	0.0618076	79.6133	BCL11B	1
GO:0050686	negative regulation of mRNA processing	biological process	1/9	27/17913	0.0134871	0.0951625	0.0618076	73.716	HNRNPA2B1	1
GO:0018205	peptidyl-lysine modification	biological process	2/9	376/17913	0.0143488	0.0951625	0.0618076	10.5869	BAZ1A/PRDM2	2
GO:0003382	epithelial cell morphogenesis	biological process	1/9	31/17913	0.0154713	0.0951625	0.0618076	64.2043	BCL11B	1
GO:0043368	positive T cell selection	biological process	1/9	32/17913	0.0159668	0.0951625	0.0618076	62.1979	BCL11B	1
GO:0007340	acrosome reaction	biological process	1/9	33/17913	0.0164621	0.0951625	0.0618076	60.3131	ABHD2	1
GO:0010837	regulation of keratinocyte proliferation	biological process	1/9	33/17913	0.0164621	0.0951625	0.0618076	60.3131	BCL11B	1
GO:0010259	multicellular organism aging	biological process	1/9	34/17913	0.0169572	0.0951625	0.0618076	58.5392	PRDM2	1
GO:0097009	energy homeostasis	biological process	1/9	34/17913	0.0169572	0.0951625	0.0618076	58.5392	METRNL	1
GO:0016570	histone modification	biological process	2/9	420/17913	0.0177037	0.0951625	0.0618076	9.47778	BAZ1A/PRDM2	2
GO:0051973	positive regulation of telomerase activity	biological process	1/9	36/17913	0.0179467	0.0951625	0.0618076	55.287	HNRNPA2B1	1
GO:0046461	neutral lipid catabolic process	biological process	1/9	37/17913	0.0184411	0.0951625	0.0618076	53.7928	ABHD2	1
GO:0046464	acylglycerol catabolic process	biological process	1/9	37/17913	0.0184411	0.0951625	0.0618076	53.7928	ABHD2	1
GO:1904358	positive regulation of telomere maintenance via telomere lengthening	biological process	1/9	37/17913	0.0184411	0.0951625	0.0618076	53.7928	HNRNPA2B1	1
GO:0016569	covalent chromatin modification	biological process	2/9	433/17913	0.0187541	0.0951625	0.0618076	9.19323	BAZ1A/PRDM2	2
GO:0050873	brown fat cell differentiation	biological process	1/9	41/17913	0.0204165	0.0951625	0.0618076	48.5447	METRNL	1
GO:0009409	response to cold	biological process	1/9	43/17913	0.0214029	0.0951625	0.0618076	46.2868	METRNL	1
GO:0043616	keratinocyte proliferation	biological process	1/9	43/17913	0.0214029	0.0951625	0.0618076	46.2868	BCL11B	1
GO:0035196	production of miRNAs involved in gene silencing by miRNA	biological process	1/9	44/17913	0.0218957	0.0951625	0.0618076	45.2348	HNRNPA2B1	1
GO:0032570	response to progesterone	biological process	1/9	45/17913	0.0223884	0.0951625	0.0618076	44.2296	ABHD2	1
GO:0045058	T cell selection	biological process	1/9	45/17913	0.0223884	0.0951625	0.0618076	44.2296	BCL11B	1
GO:0048538	thymus development	biological process	1/9	46/17913	0.0228808	0.0951625	0.0618076	43.2681	BCL11B	1
GO:0035722	interleukin-12-mediated signaling pathway	biological process	1/9	47/17913	0.023373	0.0951625	0.0618076	42.3475	HNRNPA2B1	1
GO:0031050	dsRNA processing	biological process	1/9	48/17913	0.023865	0.0951625	0.0618076	41.4653	HNRNPA2B1	1
GO:0051972	regulation of telomerase activity	biological process	1/9	48/17913	0.023865	0.0951625	0.0618076	41.4653	HNRNPA2B1	1
GO:0070918	production of small RNA involved in gene silencing by RNA	biological process	1/9	48/17913	0.023865	0.0951625	0.0618076	41.4653	HNRNPA2B1	1
GO:0071349	cellular response to interleukin-12	biological process	1/9	49/17913	0.0243567	0.0951625	0.0618076	40.619	HNRNPA2B1	1
GO:0060976	coronary vasculature development	biological process	1/9	50/17913	0.0248482	0.0951625	0.0618076	39.8067	ADAMTS6	1
GO:0070671	response to interleukin-12	biological process	1/9	50/17913	0.0248482	0.0951625	0.0618076	39.8067	HNRNPA2B1	1
GO:0032206	positive regulation of telomere maintenance	biological process	1/9	51/17913	0.0253396	0.0951625	0.0618076	39.0261	HNRNPA2B1	1
GO:0021879	forebrain neuron differentiation	biological process	1/9	52/17913	0.0258307	0.0951625	0.0618076	38.2756	BCL11B	1
GO:0046503	glycerolipid catabolic process	biological process	1/9	53/17913	0.0263215	0.0951625	0.0618076	37.5535	ABHD2	1
GO:0035904	aorta development	biological process	1/9	57/17913	0.0282828	0.100303	0.0651464	34.9181	ADAMTS6	1
GO:0002562	somatic diversification of immune receptors via germline recombination within a single locus	biological process	1/9	60/17913	0.0297515	0.100303	0.0651464	33.1722	BCL11B	1
GO:0016444	somatic cell DNA recombination	biological process	1/9	60/17913	0.0297515	0.100303	0.0651464	33.1722	BCL11B	1
GO:1904356	regulation of telomere maintenance via telomere lengthening	biological process	1/9	61/17913	0.0302406	0.100303	0.0651464	32.6284	HNRNPA2B1	1
GO:0021872	forebrain generation of neurons	biological process	1/9	63/17913	0.0312182	0.100303	0.0651464	31.5926	BCL11B	1
GO:0045600	positive regulation of fat cell differentiation	biological process	1/9	63/17913	0.0312182	0.100303	0.0651464	31.5926	METRNL	1
GO:0048663	neuron fate commitment	biological process	1/9	64/17913	0.0317067	0.100303	0.0651464	31.099	BCL11B	1
GO:0014823	response to activity	biological process	1/9	65/17913	0.0321949	0.100303	0.0651464	30.6205	METRNL	1
GO:2000573	positive regulation of DNA biosynthetic process	biological process	1/9	66/17913	0.0326829	0.100303	0.0651464	30.1566	HNRNPA2B1	1
GO:0002200	somatic diversification of immune receptors	biological process	1/9	67/17913	0.0331707	0.100303	0.0651464	29.7065	BCL11B	1
GO:0033077	T cell differentiation in thymus	biological process	1/9	69/17913	0.0341457	0.100303	0.0651464	28.8454	BCL11B	1
GO:1903312	negative regulation of mRNA metabolic process	biological process	1/9	69/17913	0.0341457	0.100303	0.0651464	28.8454	HNRNPA2B1	1
GO:0048024	regulation of mRNA splicing, via spliceosome	biological process	1/9	75/17913	0.0370653	0.107204	0.0696288	26.5378	HNRNPA2B1	1
GO:0010833	telomere maintenance via telomere lengthening	biological process	1/9	79/17913	0.0390074	0.109453	0.0710896	25.1941	HNRNPA2B1	1
GO:0032204	regulation of telomere maintenance	biological process	1/9	79/17913	0.0390074	0.109453	0.0710896	25.1941	HNRNPA2B1	1
GO:0042475	odontogenesis of dentin-containing tooth	biological process	1/9	85/17913	0.0419139	0.115518	0.0750285	23.4157	BCL11B	1
GO:0032392	DNA geometric change	biological process	1/9	86/17913	0.0423976	0.115518	0.0750285	23.1434	HNRNPA2B1	1
GO:0009791	post-embryonic development	biological process	1/9	88/17913	0.0433643	0.116464	0.0756429	22.6174	BCL11B	1
GO:0046632	alpha-beta T cell differentiation	biological process	1/9	99/17913	0.0486655	0.128326	0.0833472	20.1044	BCL11B	1
GO:0060840	artery development	biological process	1/9	100/17913	0.0491461	0.128326	0.0833472	19.9033	ADAMTS6	1
