# Supplementary material for: Overexpression of miR-10a-5p facilitates the progression of osteoarthritis
Source: Aging (Albany NY). 2020 Apr 13;12(7):5948–76. doi: 10.18632/aging.102989 (PMC7185093; doi:10.18632/aging.102989)
Supplement: Supplementary Table 18 [file aging-12-102989-s001..xlsx]

## Sheet: GSEA+BP
Table S18: Detailed GSEA(biological process) of differentially expressed mRNAs.
Geneset	Description	NGSEA:ES	NGSEA:NES	NGSEA:P-value	NGSEA:FDR	GSEA:ES	GSEA:NES	GSEA:P-value	GSEA:FDR
GO:0006888	ER to Golgi vesicle-mediated transport	0.215	0.597	0.98	1	0.225	0.621	0.94	0.99
GO:0001656	metanephros development	0.465	1.233	0.17	0.46	0.481	1.157	0.28	0.55
GO:0007595	lactation	0.388	1.045	0.41	0.76	0.46	1.089	0.35	0.6
GO:0006904	vesicle docking involved in exocytosis	0.222	0.557	0.96	1	-0.445	-1.176	0.29	0.5
GO:0007596	blood coagulation	0.578	1.762	0	0.064	0.648	2.279	0	0
GO:0001501	skeletal system development	0.457	1.341	0.017	0.35	0.484	1.51	0.036	0.28
GO:0001503	ossification	0.556	1.556	0.001	0.2	0.509	1.381	0.12	0.38
GO:0008063	Toll signaling pathway	0.347	0.982	0.53	0.86	0.357	1.078	0.35	0.61
GO:0070936	protein K48-linked ubiquitination	0.293	0.785	0.79	0.99	-0.249	-0.749	0.86	0.96
GO:0000245	spliceosome assembly	0.323	0.826	0.71	0.97	-0.528	-1.431	0.074	0.2
GO:0003151	outflow tract morphogenesis	0.46	1.195	0.23	0.51	0.338	0.761	0.73	0.9
GO:0006306	DNA methylation	0.567	1.391	0.11	0.3	0.468	1.091	0.34	0.6
GO:0006302	double-strand break repair	0.458	1.265	0.12	0.42	-0.587	-2.009	0	0.0037
GO:0051496	positive regulation of stress fiber assembly	0.565	1.458	0.059	0.26	0.478	1.096	0.35	0.6
GO:0000165	MAPK cascade	0.28	0.775	0.85	0.99	0.429	1.174	0.28	0.53
GO:0006309	DNA fragmentation involved in apoptotic nuclear change	0.492	1.29	0.15	0.4	-0.431	-1.18	0.26	0.49
GO:0034329	cell junction assembly	0.321	0.915	0.67	0.94	0.451	1.209	0.25	0.51
GO:0030855	epithelial cell differentiation	0.533	1.45	0.034	0.26	0.517	1.21	0.24	0.51
GO:0007088	regulation of mitosis	0.586	1.462	0.062	0.25	-0.684	-1.794	0.0022	0.023
GO:0006284	base-excision repair	0.419	1.118	0.3	0.63	-0.533	-1.629	0.0069	0.067
GO:0015992	proton transport	0.333	0.917	0.64	0.94	0.295	0.78	0.72	0.89
GO:0006283	transcription-coupled nucleotide-excision repair	0.398	1.099	0.32	0.66	-0.43	-1.366	0.088	0.28
GO:0031100	organ regeneration	0.735	2.042	0	0.0021	0.688	1.874	0.0051	0.047
GO:0060548	negative regulation of cell death	0.498	1.262	0.16	0.43	0.398	0.946	0.48	0.76
GO:0051297	centrosome organization	0.523	1.309	0.13	0.37	-0.703	-1.858	0.0044	0.013
GO:0051291	protein heterooligomerization	0.49	1.346	0.08	0.34	0.641	1.619	0.023	0.19
GO:0006289	nucleotide-excision repair	0.362	1.035	0.41	0.77	-0.459	-1.638	0.0029	0.064
GO:0042147	retrograde transport, endosome to Golgi	-0.33	-1.562	0	0.091	0.218	0.551	0.95	1
GO:0046330	positive regulation of JNK cascade	0.329	0.91	0.65	0.94	0.596	1.579	0.04	0.23
GO:0008360	regulation of cell shape	0.423	1.204	0.12	0.5	0.42	1.232	0.21	0.48
GO:0000375	RNA splicing, via transesterification reactions	0.274	0.707	0.87	1	-0.381	-1.094	0.34	0.6
GO:0007286	spermatid development	0.434	1.202	0.18	0.5	-0.571	-1.593	0.029	0.079
GO:0001756	somitogenesis	0.348	0.932	0.6	0.92	0.403	0.972	0.46	0.74
GO:0050770	regulation of axonogenesis	0.273	0.714	0.87	1	0.352	0.824	0.63	0.86
GO:0042325	regulation of phosphorylation	0.655	1.632	0.017	0.14	0.746	1.738	0.023	0.1
GO:0042327	positive regulation of phosphorylation	0.43	1.108	0.31	0.65	0.374	0.903	0.54	0.79
GO:0042326	negative regulation of phosphorylation	0.724	1.881	0.001	0.025	0.636	1.534	0.058	0.25
GO:0006271	DNA strand elongation involved in DNA replication	0.76	1.998	0	0.0039	-0.789	-2.352	0	0.00015
GO:0006270	DNA-dependent DNA replication initiation	0.691	1.766	0.0051	0.065	-0.625	-1.752	0.0043	0.032
GO:0051781	positive regulation of cell division	0.378	1.033	0.41	0.77	-0.354	-1.001	0.48	0.68
GO:0006378	mRNA polyadenylation	0.342	0.861	0.65	0.96	0.19	0.441	0.99	1
GO:0042692	muscle cell differentiation	0.261	0.698	0.9	1	0.251	0.633	0.91	0.99
GO:0006457	protein folding	0.325	0.956	0.63	0.89	0.259	0.877	0.68	0.82
GO:0090263	positive regulation of canonical Wnt receptor signaling pathway	0.29	0.791	0.81	0.99	0.323	0.84	0.61	0.85
GO:0019083	viral transcription	0.296	0.849	0.79	0.96	-0.548	-1.976	0	0.0051
GO:0043966	histone H3 acetylation	0.262	0.715	0.91	1	-0.211	-0.655	0.95	0.99
GO:0032760	positive regulation of tumor necrosis factor production	0.552	1.473	0.039	0.24	0.582	1.338	0.19	0.4
GO:0006595	polyamine metabolic process	0.75	1.817	0.0051	0.04	0.467	1.066	0.38	0.62
GO:0030177	positive regulation of Wnt receptor signaling pathway	0.429	1.079	0.38	0.69	0.309	0.724	0.77	0.93
GO:0016266	O-glycan processing	0.242	0.674	0.93	1	-0.275	-0.826	0.71	0.9
GO:0031175	neuron projection development	0.39	1.075	0.34	0.7	0.333	0.92	0.54	0.79
GO:0035556	intracellular signal transduction	0.284	0.852	0.91	0.96	0.343	1.139	0.25	0.56
GO:0030178	negative regulation of Wnt receptor signaling pathway	0.485	1.272	0.15	0.41	0.473	1.156	0.29	0.55
GO:0032091	negative regulation of protein binding	0.439	1.098	0.34	0.66	0.501	1.2	0.27	0.51
GO:0032092	positive regulation of protein binding	0.55	1.42	0.056	0.28	0.63	1.516	0.089	0.27
GO:0042552	myelination	0.247	0.663	0.93	1	0.39	0.957	0.48	0.75
GO:0000902	cell morphogenesis	0.539	1.474	0.027	0.25	0.598	1.554	0.049	0.24
GO:0015991	ATP hydrolysis coupled proton transport	0.308	0.828	0.74	0.97	0.502	1.257	0.21	0.46
GO:0008645	hexose transport	0.489	1.336	0.076	0.35	0.729	1.938	0.005	0.021
GO:0006886	intracellular protein transport	0.227	0.672	1	1	0.158	0.536	1	1
GO:0006887	exocytosis	0.346	0.959	0.56	0.89	0.502	1.324	0.18	0.41
GO:0042254	ribosome biogenesis	0.253	0.67	0.88	1	-0.319	-0.935	0.56	0.75
GO:0008643	carbohydrate transport	0.479	1.275	0.13	0.41	0.669	1.633	0.036	0.19
GO:0006112	energy reserve metabolic process	0.311	0.899	0.71	0.95	0.542	1.575	0.022	0.23
GO:0046854	phosphatidylinositol phosphorylation	0.311	0.815	0.76	0.98	0.43	1.067	0.35	0.62
GO:0048705	skeletal system morphogenesis	0.424	1.095	0.34	0.66	-0.261	-0.726	0.84	0.97
GO:0007626	locomotory behavior	0.316	0.891	0.69	0.96	0.581	1.474	0.11	0.31
GO:0019882	antigen processing and presentation	0.547	1.446	0.034	0.27	0.431	1.036	0.41	0.66
GO:0048706	embryonic skeletal system development	0.55	1.452	0.051	0.26	0.533	1.298	0.2	0.43
GO:0048701	embryonic cranial skeleton morphogenesis	0.444	1.142	0.31	0.59	-0.411	-1.042	0.41	0.64
GO:0006629	lipid metabolic process	0.564	1.678	0	0.11	0.698	2.322	0	0
GO:0033077	T cell differentiation in thymus	0.296	0.779	0.81	0.99	0.27	0.642	0.88	0.98
GO:0043200	response to amino acid stimulus	0.565	1.487	0.043	0.24	-0.429	-1.213	0.19	0.45
GO:0006626	protein targeting to mitochondrion	0.356	0.934	0.58	0.92	-0.338	-0.971	0.52	0.71
GO:0007628	adult walking behavior	0.458	1.172	0.26	0.54	0.653	1.525	0.097	0.26
GO:0043410	positive regulation of MAPK cascade	0.451	1.259	0.098	0.43	0.357	0.965	0.49	0.74
GO:0007051	spindle organization	0.646	1.627	0.021	0.14	-0.73	-1.905	0	0.0094
GO:0007052	mitotic spindle organization	0.531	1.298	0.15	0.39	-0.627	-1.602	0.021	0.075
GO:0032480	negative regulation of type I interferon production	0.348	0.917	0.62	0.94	0.402	1.031	0.41	0.66
GO:0009267	cellular response to starvation	0.578	1.486	0.048	0.24	0.681	1.56	0.085	0.24
GO:0032956	regulation of actin cytoskeleton organization	0.399	1.055	0.4	0.74	0.537	1.311	0.18	0.41
GO:0007059	chromosome segregation	0.551	1.555	0.003	0.2	-0.686	-2.328	0	0.00013
GO:0016070	RNA metabolic process	0.295	0.888	0.84	0.96	-0.356	-1.507	0.005	0.13
GO:0016071	mRNA metabolic process	0.29	0.865	0.86	0.96	-0.375	-1.557	0	0.098
GO:0071347	cellular response to interleukin-1	0.632	1.63	0.011	0.14	0.574	1.345	0.18	0.39
GO:0006099	tricarboxylic acid cycle	0.205	0.537	0.97	1	-0.213	-0.615	0.95	1
GO:0033574	response to testosterone stimulus	0.615	1.577	0.029	0.18	0.723	1.727	0.047	0.11
GO:0001974	blood vessel remodeling	0.649	1.693	0.005	0.1	0.469	1.144	0.31	0.56
GO:0048812	neuron projection morphogenesis	0.485	1.279	0.14	0.4	0.503	1.234	0.23	0.48
GO:0006695	cholesterol biosynthetic process	0.538	1.422	0.054	0.28	0.687	1.771	0.011	0.092
GO:0006694	steroid biosynthetic process	0.413	1.055	0.39	0.74	0.295	0.681	0.81	0.96
GO:0033572	transferrin transport	0.465	1.246	0.18	0.46	0.545	1.388	0.14	0.37
GO:0006754	ATP biosynthetic process	0.171	0.456	0.99	1	-0.172	-0.468	0.99	1
GO:0034142	toll-like receptor 4 signaling pathway	0.302	0.849	0.78	0.96	0.301	0.896	0.59	0.8
GO:0048147	negative regulation of fibroblast proliferation	0.406	1.038	0.42	0.77	0.311	0.734	0.77	0.92
GO:0048146	positive regulation of fibroblast proliferation	0.485	1.319	0.092	0.36	0.459	1.167	0.29	0.54
GO:0033209	tumor necrosis factor-mediated signaling pathway	0.341	0.889	0.65	0.96	0.39	0.917	0.54	0.79
GO:0021766	hippocampus development	0.407	1.095	0.33	0.67	-0.37	-1.031	0.41	0.64
GO:0009411	response to UV	0.476	1.28	0.13	0.4	-0.407	-1.238	0.15	0.42
GO:0050434	positive regulation of viral transcription	0.286	0.791	0.82	0.99	-0.206	-0.673	0.92	0.99
GO:0014070	response to organic cyclic compound	0.601	1.728	0	0.082	0.526	1.596	0.02	0.22
GO:0007126	meiosis	0.393	1.106	0.28	0.65	-0.684	-2.138	0	0.00072
GO:0000288	nuclear-transcribed mRNA catabolic process, deadenylation-dependent decay	0.32	0.875	0.72	0.96	-0.295	-0.977	0.49	0.7
GO:0000289	nuclear-transcribed mRNA poly(A) tail shortening	0.289	0.746	0.84	0.99	-0.3	-0.846	0.68	0.87
GO:0000122	negative regulation of transcription from RNA polymerase II promoter	0.334	1.017	0.43	0.8	0.262	0.929	0.6	0.78
GO:0009653	anatomical structure morphogenesis	0.318	0.922	0.68	0.93	0.336	0.951	0.5	0.76
GO:0043484	regulation of RNA splicing	0.553	1.387	0.083	0.3	0.6	1.359	0.16	0.39
GO:0022008	neurogenesis	0.355	0.948	0.55	0.9	-0.398	-1.066	0.35	0.62
GO:0019058	viral infectious cycle	0.309	0.883	0.74	0.95	-0.525	-1.946	0	0.0069
GO:0045740	positive regulation of DNA replication	0.414	1.093	0.35	0.66	-0.337	-0.985	0.49	0.7
GO:0002224	toll-like receptor signaling pathway	0.292	0.829	0.82	0.97	0.267	0.795	0.78	0.88
GO:0006281	DNA repair	0.4	1.202	0.032	0.5	-0.466	-2.038	0	0.0027
GO:0008284	positive regulation of cell proliferation	0.339	1.028	0.38	0.78	0.28	0.96	0.54	0.75
GO:0008285	negative regulation of cell proliferation	0.366	1.106	0.14	0.65	0.325	1.126	0.26	0.58
GO:0008286	insulin receptor signaling pathway	0.305	0.893	0.76	0.96	0.309	0.983	0.49	0.73
GO:0006879	cellular iron ion homeostasis	0.568	1.6	0	0.16	0.672	1.879	0.0017	0.045
GO:0006892	post-Golgi vesicle-mediated transport	0.337	0.91	0.64	0.94	0.314	0.863	0.6	0.83
GO:0006874	cellular calcium ion homeostasis	0.388	1.095	0.3	0.67	0.426	1.094	0.33	0.6
GO:0043687	post-translational protein modification	0.249	0.735	0.98	1	0.27	0.873	0.69	0.82
GO:0006974	response to DNA damage stimulus	0.363	1.054	0.35	0.74	-0.253	-0.979	0.5	0.7
GO:0006890	retrograde vesicle-mediated transport, Golgi to ER	-0.212	-1.174	0	0.5	0.228	0.567	0.93	1
GO:0048754	branching morphogenesis of a tube	0.4	1.064	0.37	0.72	0.299	0.702	0.81	0.95
GO:0007409	axonogenesis	0.343	0.966	0.54	0.88	0.506	1.344	0.17	0.39
GO:0001657	ureteric bud development	0.6	1.632	0.004	0.14	0.534	1.365	0.16	0.39
GO:0001658	branching involved in ureteric bud morphogenesis	0.318	0.847	0.71	0.96	0.357	0.869	0.58	0.82
GO:0044255	cellular lipid metabolic process	0.473	1.383	0.006	0.3	0.572	1.868	0	0.049
GO:0043928	exonucleolytic nuclear-transcribed mRNA catabolic process involved in deadenylation-dependent decay	0.378	0.98	0.5	0.87	-0.371	-1.042	0.41	0.64
GO:0006979	response to oxidative stress	0.449	1.3	0.035	0.38	0.538	1.613	0.025	0.2
GO:0006338	chromatin remodeling	0.264	0.727	0.91	1	-0.271	-0.876	0.69	0.84
GO:0006334	nucleosome assembly	0.701	2.007	0	0.0034	-0.774	-2.795	0	0
GO:0010718	positive regulation of epithelial to mesenchymal transition	0.526	1.304	0.13	0.38	0.444	1.047	0.37	0.64
GO:0042590	antigen processing and presentation of exogenous peptide antigen via MHC class I	0.336	0.962	0.57	0.88	0.261	0.763	0.78	0.91
GO:0031124	mRNA 3'-end processing	0.294	0.789	0.8	0.99	-0.544	-1.665	0.0072	0.057
GO:0048013	ephrin receptor signaling pathway	0.277	0.729	0.86	1	0.349	0.82	0.66	0.86
GO:0008217	regulation of blood pressure	0.441	1.223	0.14	0.47	0.677	1.766	0.0088	0.09
GO:0016254	preassembly of GPI anchor in ER membrane	0.434	1.075	0.37	0.7	0.216	0.512	0.97	1
GO:0050896	response to stimulus	0.277	0.849	0.96	0.96	0.462	1.3	0.16	0.43
GO:0016525	negative regulation of angiogenesis	0.657	1.824	0	0.038	0.52	1.315	0.18	0.41
GO:0018107	peptidyl-threonine phosphorylation	0.461	1.18	0.23	0.53	0.53	1.297	0.2	0.43
GO:0018105	peptidyl-serine phosphorylation	0.299	0.817	0.79	0.98	0.404	1.108	0.34	0.59
GO:0030030	cell projection organization	0.308	0.869	0.73	0.96	-0.433	-1.443	0.064	0.19
GO:0030032	lamellipodium assembly	0.299	0.759	0.79	0.99	0.387	0.926	0.52	0.78
GO:0018108	peptidyl-tyrosine phosphorylation	0.389	1.078	0.35	0.7	0.405	1.082	0.36	0.61
GO:0060021	palate development	0.348	0.974	0.53	0.87	0.253	0.685	0.86	0.96
GO:0042593	glucose homeostasis	0.487	1.368	0.04	0.32	0.691	1.846	0.007	0.06
GO:0050900	leukocyte migration	0.537	1.557	0	0.2	0.529	1.54	0.043	0.25
GO:0001889	liver development	0.543	1.539	0.002	0.21	0.615	1.76	0.0096	0.09
GO:0042594	response to starvation	0.507	1.321	0.12	0.36	0.713	1.661	0.055	0.17
GO:0009888	tissue development	0.244	0.64	0.93	1	-0.333	-0.898	0.62	0.81
GO:0045444	fat cell differentiation	0.312	0.832	0.74	0.97	0.306	0.793	0.68	0.88
GO:0008219	cell death	0.306	0.905	0.75	0.94	0.311	1.01	0.41	0.69
GO:0006090	pyruvate metabolic process	0.411	1.052	0.4	0.74	0.348	0.833	0.63	0.85
GO:0006096	glycolysis	0.519	1.433	0.034	0.27	0.428	1.103	0.34	0.59
GO:0051301	cell division	0.476	1.437	0	0.27	-0.532	-2.27	0	0.00019
GO:0006094	gluconeogenesis	0.632	1.733	0.002	0.082	0.677	1.75	0.014	0.096
GO:0032355	response to estradiol stimulus	0.534	1.529	0.001	0.22	0.408	1.154	0.29	0.55
GO:0006486	protein glycosylation	0.25	0.706	0.95	1	0.453	1.244	0.21	0.48
GO:0006487	protein N-linked glycosylation	0.292	0.714	0.85	1	0.533	1.232	0.24	0.48
GO:0006488	dolichol-linked oligosaccharide biosynthetic process	0.314	0.849	0.71	0.96	0.209	0.557	0.96	1
GO:0006521	regulation of cellular amino acid metabolic process	0.281	0.777	0.86	0.99	-0.498	-1.638	0.0072	0.065
GO:0006520	cellular amino acid metabolic process	0.466	1.264	0.14	0.42	0.624	1.625	0.037	0.19
GO:0009636	response to toxin	0.566	1.589	0	0.17	0.565	1.568	0.033	0.23
