# Supplementary material for: Overexpression of miR-10a-5p facilitates the progression of osteoarthritis
Source: Aging (Albany NY). 2020 Apr 13;12(7):5948–76. doi: 10.18632/aging.102989 (PMC7185093; doi:10.18632/aging.102989)
Supplement: Supplementary Table 19 [file aging-12-102989-s004..xlsx]

## Sheet: GSEA+KEGG
Table S19: Detailed GSEA(KEGG) of differentially expressed mRNAs.
Geneset	Description	NGSEA:ES	NGSEA:NES	NGSEA:P-value	NGSEA:FDR	GSEA:ES	GSEA:NES	GSEA:P-value	GSEA:FDR
hsa00563	Glycosylphosphatidylinositol(GPI)-anchor biosynthesis	0.242	0.623	0.94	1	0.199	0.501	0.98	0.99
hsa00562	Inositol phosphate metabolism	0.299	0.843	0.8	1	0.384	1.085	0.35	0.54
hsa00561	Glycerolipid metabolism	0.405	1.137	0.25	0.59	0.479	1.312	0.18	0.35
hsa00565	Ether lipid metabolism	0.214	0.59	0.98	1	0.439	1.082	0.35	0.54
hsa00564	Glycerophospholipid metabolism	0.258	0.74	0.94	1	0.375	1.087	0.34	0.54
hsa00480	Glutathione metabolism	0.493	1.352	0.059	0.23	-0.344	-1.095	0.32	0.53
hsa05020	Prion diseases	0.615	1.645	0.007	0.036	0.663	1.654	0.036	0.11
hsa05323	Rheumatoid arthritis	0.53	1.535	0.002	0.079	0.418	1.204	0.22	0.44
hsa00240	Pyrimidine metabolism	0.359	1.039	0.4	0.82	-0.323	-1.178	0.16	0.46
hsa03020	RNA polymerase	0.244	0.649	0.92	1	0.22	0.566	0.96	1
hsa04350	TGF-beta signaling pathway	0.354	1.007	0.47	0.88	0.428	1.25	0.18	0.39
hsa04912	GnRH signaling pathway	0.289	0.831	0.84	1	0.402	1.169	0.25	0.46
hsa05100	Bacterial invasion of epithelial cells	0.269	0.767	0.88	1	0.259	0.767	0.78	0.86
hsa04913	Ovarian steroidogenesis	0.46	1.277	0.1	0.32	0.401	1.01	0.4	0.59
hsa04110	Cell cycle	0.496	1.451	0.002	0.13	-0.416	-1.582	0.0094	0.058
hsa04662	B cell receptor signaling pathway	0.262	0.745	0.91	1	0.443	1.273	0.17	0.37
hsa04114	Oocyte meiosis	0.368	1.066	0.33	0.75	-0.366	-1.364	0.042	0.21
hsa04115	p53 signaling pathway	0.513	1.455	0.013	0.13	0.388	1.124	0.31	0.51
hsa04072	Phospholipase D signaling pathway	0.264	0.778	0.95	1	0.382	1.195	0.22	0.44
hsa04750	Inflammatory mediator regulation of TRP channels	0.293	0.846	0.81	1	0.514	1.491	0.061	0.21
hsa05222	Small cell lung cancer	0.443	1.263	0.059	0.35	0.336	1.009	0.44	0.59
hsa03010	Ribosome	0.312	0.909	0.72	1	0.355	1.14	0.26	0.5
hsa05220	Chronic myeloid leukemia	0.39	1.114	0.27	0.61	0.428	1.262	0.17	0.38
hsa05340	Primary immunodeficiency	0.252	0.673	0.94	1	0.442	1.003	0.44	0.59
hsa04916	Melanogenesis	0.325	0.944	0.62	0.98	0.356	1.06	0.37	0.56
hsa00640	Propanoate metabolism	0.407	1.052	0.39	0.78	0.199	0.504	0.98	1
hsa04930	Type II diabetes mellitus	0.442	1.223	0.15	0.4	0.651	1.661	0.019	0.1
hsa04931	Insulin resistance	0.497	1.438	0.009	0.14	0.564	1.724	0.0044	0.079
hsa04932	Non-alcoholic fatty liver disease (NAFLD)	0.263	0.773	0.95	1	0.234	0.76	0.85	0.87
hsa01040	Biosynthesis of unsaturated fatty acids	0.574	1.492	0.04	0.11	0.459	1.068	0.4	0.55
hsa00310	Lysine degradation	0.356	0.99	0.49	0.91	0.201	0.564	0.98	0.99
hsa04914	Progesterone-mediated oocyte maturation	0.396	1.123	0.22	0.59	-0.236	-0.834	0.79	0.95
hsa04144	Endocytosis	0.222	0.664	1	1	0.271	0.927	0.62	0.67
hsa00620	Pyruvate metabolism	0.433	1.175	0.23	0.5	0.488	1.28	0.19	0.37
hsa00250	Alanine, aspartate and glutamate metabolism	0.407	1.093	0.34	0.67	-0.45	-1.267	0.17	0.35
hsa04340	Hedgehog signaling pathway	0.264	0.734	0.9	1	-0.384	-1.108	0.33	0.52
hsa00630	Glyoxylate and dicarboxylate metabolism	0.476	1.259	0.17	0.35	-0.553	-1.561	0.04	0.064
hsa05110	Vibrio cholerae infection	0.332	0.914	0.61	1	0.29	0.768	0.75	0.87
hsa00010	Glycolysis / Gluconeogenesis	0.627	1.754	0	0.011	0.717	2.012	0	0.0045
hsa04260	Cardiac muscle contraction	0.131	0.37	1	1	0.24	0.653	0.88	0.96
hsa04261	Adrenergic signaling in cardiomyocytes	0.23	0.677	0.99	1	0.272	0.843	0.68	0.77
hsa04923	Regulation of lipolysis in adipocytes	0.41	1.136	0.23	0.58	0.519	1.375	0.13	0.31
hsa05218	Melanoma	0.379	1.072	0.34	0.73	0.35	0.984	0.47	0.61
hsa05219	Bladder cancer	0.477	1.296	0.1	0.29	0.415	1.089	0.35	0.55
hsa04611	Platelet activation	0.463	1.351	0.012	0.22	0.689	2.116	0	0.0005
hsa04610	Complement and coagulation cascades	0.886	2.519	0	0	0.877	2.421	0	0
hsa04612	Antigen processing and presentation	0.411	1.156	0.21	0.53	0.379	1.033	0.41	0.59
hsa05212	Pancreatic cancer	0.366	1.026	0.43	0.86	0.376	1.098	0.34	0.54
hsa05213	Endometrial cancer	0.309	0.854	0.75	1	0.256	0.706	0.82	0.92
hsa05210	Colorectal cancer	0.345	0.974	0.53	0.93	0.397	1.125	0.34	0.51
hsa05211	Renal cell carcinoma	0.332	0.929	0.63	0.98	0.243	0.691	0.87	0.93
hsa05216	Thyroid cancer	0.378	0.991	0.51	0.91	0.201	0.507	0.98	1
hsa05217	Basal cell carcinoma	0.303	0.847	0.77	1	0.299	0.79	0.7	0.84
hsa05214	Glioma	0.36	1.017	0.45	0.88	0.502	1.413	0.09	0.28
hsa05215	Prostate cancer	0.386	1.111	0.25	0.62	-0.235	-0.843	0.76	0.98
hsa04514	Cell adhesion molecules (CAMs)	0.43	1.258	0.048	0.34	0.399	1.185	0.24	0.45
hsa04512	ECM-receptor interaction	0.641	1.821	0	0.0054	0.621	1.767	0.013	0.055
hsa04068	FoxO signaling pathway	0.429	1.241	0.061	0.36	0.441	1.397	0.068	0.29
hsa04066	HIF-1 signaling pathway	0.434	1.257	0.063	0.34	-0.278	-0.994	0.46	0.75
hsa00040	Pentose and glucuronate interconversions	0.515	1.389	0.064	0.18	0.715	1.673	0.06	0.098
hsa04925	Aldosterone synthesis and secretion	0.391	1.125	0.22	0.59	0.353	1.002	0.45	0.59
hsa04924	Renin secretion	0.403	1.127	0.26	0.59	0.723	1.991	0.0035	0.0058
hsa04062	Chemokine signaling pathway	0.29	0.867	0.85	1	0.408	1.314	0.12	0.35
hsa00650	Butanoate metabolism	0.535	1.386	0.083	0.18	0.69	1.647	0.04	0.11
hsa04921	Oxytocin signaling pathway	0.331	0.977	0.56	0.92	0.521	1.629	0.0058	0.12
hsa04920	Adipocytokine signaling pathway	0.436	1.23	0.12	0.38	0.629	1.814	0.005	0.035
hsa03460	Fanconi anemia pathway	0.439	1.207	0.16	0.44	-0.599	-1.955	0	0.004
hsa05145	Toxoplasmosis	0.353	1.035	0.4	0.83	0.314	0.978	0.48	0.61
hsa00140	Steroid hormone biosynthesis	0.556	1.551	0.006	0.074	0.795	1.905	0.0037	0.016
hsa04071	Sphingolipid signaling pathway	0.234	0.676	0.99	1	0.338	1.049	0.38	0.57
hsa05168	Herpes simplex infection	0.337	1.006	0.47	0.88	0.363	1.191	0.19	0.44
hsa05169	Epstein-Barr virus infection	0.307	0.913	0.75	1	0.202	0.676	0.97	0.94
hsa04210	Apoptosis	0.286	0.819	0.85	1	-0.164	-0.576	1	1
hsa05164	Influenza A	0.378	1.124	0.18	0.6	0.466	1.498	0.029	0.21
hsa05166	HTLV-I infection	0.383	1.151	0.089	0.55	0.302	1.021	0.42	0.6
hsa00380	Tryptophan metabolism	0.478	1.318	0.11	0.27	0.546	1.331	0.18	0.34
hsa05160	Hepatitis C	0.323	0.944	0.63	0.98	0.457	1.401	0.058	0.29
hsa05161	Hepatitis B	0.362	1.061	0.32	0.76	0.275	0.9	0.65	0.7
hsa05162	Measles	0.392	1.138	0.17	0.59	0.45	1.399	0.085	0.29
hsa04270	Vascular smooth muscle contraction	0.212	0.62	1	1	0.519	1.536	0.035	0.19
hsa00330	Arginine and proline metabolism	0.574	1.574	0.006	0.064	0.427	1.156	0.29	0.48
hsa04370	VEGF signaling pathway	0.269	0.75	0.9	1	0.327	0.92	0.54	0.68
hsa05205	Proteoglycans in cancer	0.38	1.133	0.13	0.58	0.45	1.523	0.019	0.19
hsa05204	Chemical carcinogenesis	0.667	1.9	0	0.0022	0.848	2.291	0	0
hsa05206	MicroRNAs in cancer	0.464	1.37	0.005	0.2	0.316	1.022	0.42	0.6
hsa05200	Pathways in cancer	0.356	1.083	0.19	0.7	0.321	1.136	0.23	0.5
hsa05203	Viral carcinogenesis	0.488	1.452	0	0.13	-0.429	-1.734	0	0.027
hsa05202	Transcriptional misregulation in cancer	0.458	1.347	0.004	0.23	-0.351	-1.384	0.021	0.2
hsa04660	T cell receptor signaling pathway	0.187	0.542	1	1	0.412	1.231	0.2	0.41
hsa04070	Phosphatidylinositol signaling system	0.271	0.779	0.91	1	0.439	1.31	0.13	0.35
hsa04910	Insulin signaling pathway	0.394	1.158	0.14	0.53	0.448	1.42	0.036	0.28
hsa04911	Insulin secretion	0.326	0.931	0.64	0.98	0.564	1.541	0.054	0.19
hsa04664	Fc epsilon RI signaling pathway	0.224	0.629	0.98	1	0.45	1.253	0.21	0.39
hsa04917	Prolactin signaling pathway	0.458	1.304	0.054	0.28	0.632	1.833	0.0095	0.03
hsa04666	Fc gamma R-mediated phagocytosis	0.247	0.709	0.96	1	0.357	1.07	0.37	0.55
hsa04915	Estrogen signaling pathway	0.387	1.117	0.26	0.61	0.36	1.08	0.35	0.54
hsa04668	TNF signaling pathway	0.39	1.134	0.2	0.59	0.269	0.834	0.72	0.78
hsa03430	Mismatch repair	0.609	1.561	0.028	0.071	-0.724	-2.078	0	0.00081
hsa04918	Thyroid hormone synthesis	0.354	0.997	0.49	0.9	0.357	0.973	0.47	0.61
hsa04919	Thyroid hormone signaling pathway	0.317	0.921	0.69	1	0.394	1.229	0.18	0.41
hsa00410	beta-Alanine metabolism	0.598	1.593	0.007	0.058	0.417	1.019	0.43	0.59
hsa04970	Salivary secretion	0.384	1.105	0.27	0.63	0.771	2.04	0	0.003
hsa04971	Gastric acid secretion	0.196	0.555	0.99	1	0.49	1.287	0.19	0.37
hsa04972	Pancreatic secretion	0.274	0.791	0.91	1	0.614	1.709	0.016	0.083
hsa04973	Carbohydrate digestion and absorption	0.552	1.522	0.015	0.083	0.85	2.02	0.0019	0.0042
hsa04974	Protein digestion and absorption	0.455	1.304	0.045	0.29	0.516	1.419	0.11	0.27
hsa04975	Fat digestion and absorption	0.606	1.648	0.003	0.037	0.824	1.872	0.0019	0.021
hsa04976	Bile secretion	0.458	1.307	0.055	0.29	0.678	1.778	0.01	0.05
hsa04978	Mineral absorption	0.476	1.33	0.068	0.25	0.518	1.33	0.18	0.34
hsa04146	Peroxisome	0.377	1.065	0.35	0.74	0.434	1.289	0.16	0.37
hsa00600	Sphingolipid metabolism	0.188	0.504	1	1	0.501	1.339	0.18	0.33
hsa00030	Pentose phosphate pathway	0.568	1.468	0.047	0.12	0.54	1.356	0.18	0.32
hsa00230	Purine metabolism	0.351	1.042	0.38	0.82	0.233	0.758	0.89	0.87
hsa04360	Axon guidance	0.303	0.884	0.78	1	0.34	1.053	0.39	0.56
hsa04080	Neuroactive ligand-receptor interaction	0.326	0.98	0.58	0.92	0.561	1.569	0.038	0.16
hsa04064	NF-kappa B signaling pathway	0.356	1.024	0.42	0.85	-0.319	-1.11	0.25	0.54
hsa04520	Adherens junction	0.265	0.751	0.93	1	0.262	0.75	0.8	0.87
hsa00830	Retinol metabolism	0.672	1.878	0	0.0027	0.918	2.267	0	0
hsa03030	DNA replication	0.664	1.79	0	0.0079	-0.729	-2.264	0	0
hsa04922	Glucagon signaling pathway	0.427	1.221	0.09	0.4	0.575	1.703	0.0062	0.083
hsa04672	Intestinal immune network for IgA production	0.379	1.04	0.4	0.82	-0.428	-1.125	0.31	0.52
hsa04670	Leukocyte transendothelial migration	0.326	0.951	0.61	0.98	0.47	1.425	0.068	0.27
hsa04060	Cytokine-cytokine receptor interaction	0.311	0.936	0.71	0.97	0.409	1.279	0.14	0.37
hsa03018	RNA degradation	0.354	1.001	0.49	0.89	-0.333	-1.181	0.16	0.48
hsa04962	Vasopressin-regulated water reabsorption	0.18	0.492	0.99	1	-0.196	-0.603	0.98	1
hsa04961	Endocrine and other factor-regulated calcium reabsorption	0.222	0.613	0.97	1	0.276	0.739	0.77	0.89
hsa04960	Aldosterone-regulated sodium reabsorption	0.206	0.565	0.97	1	0.399	0.977	0.44	0.61
hsa04966	Collecting duct acid secretion	0.362	0.963	0.53	0.95	0.406	0.953	0.49	0.64
hsa05142	Chagas disease (American trypanosomiasis)	0.345	1.01	0.46	0.89	0.444	1.366	0.1	0.31
hsa05143	African trypanosomiasis	0.77	2.049	0	0.0002	0.829	1.935	0	0.011
hsa05140	Leishmaniasis	0.449	1.276	0.087	0.32	0.479	1.314	0.15	0.36
hsa05146	Amoebiasis	0.525	1.522	0.002	0.085	0.563	1.681	0.0093	0.095
hsa05144	Malaria	0.711	1.965	0	0.00071	0.746	1.945	0.0017	0.011
hsa01130	Biosynthesis of antibiotics	0.472	1.401	0	0.17	0.399	1.343	0.062	0.33
hsa01230	Biosynthesis of amino acids	0.603	1.697	0	0.023	0.59	1.719	0.013	0.08
hsa04310	Wnt signaling pathway	0.283	0.826	0.89	1	0.323	1.003	0.44	0.59
hsa03050	Proteasome	0.28	0.768	0.86	1	-0.501	-1.588	0.021	0.06
hsa03008	Ribosome biogenesis in eukaryotes	0.232	0.654	0.98	1	-0.206	-0.746	0.92	1
hsa04510	Focal adhesion	0.425	1.258	0.021	0.35	0.478	1.581	0.0027	0.16
hsa03440	Homologous recombination	0.49	1.295	0.13	0.29	-0.647	-1.919	0	0.0047
hsa04015	Rap1 signaling pathway	0.315	0.938	0.7	0.98	0.368	1.197	0.18	0.44
hsa04014	Ras signaling pathway	0.258	0.776	0.98	1	0.263	0.856	0.7	0.75
hsa04390	Hippo signaling pathway	0.317	0.939	0.66	0.98	0.379	1.2	0.2	0.44
hsa04012	ErbB signaling pathway	0.291	0.832	0.84	1	0.386	1.135	0.31	0.5
hsa04640	Hematopoietic cell lineage	0.436	1.241	0.081	0.36	0.515	1.348	0.15	0.33
hsa04010	MAPK signaling pathway	0.28	0.834	0.95	1	0.313	1.062	0.36	0.56
hsa00534	Glycosaminoglycan biosynthesis - heparan sulfate / heparin	0.208	0.541	0.97	1	0.628	1.481	0.12	0.22
hsa05223	Non-small cell lung cancer	0.346	0.948	0.58	0.98	0.404	1.123	0.31	0.51
hsa04713	Circadian entrainment	0.359	1.029	0.42	0.85	0.528	1.5	0.058	0.21
hsa04152	AMPK signaling pathway	0.39	1.133	0.19	0.58	0.484	1.474	0.035	0.23
hsa00531	Glycosaminoglycan degradation	0.516	1.288	0.16	0.3	0.56	1.28	0.2	0.38
hsa00532	Glycosaminoglycan biosynthesis - chondroitin sulfate / dermatan sulfate	0.431	1.087	0.37	0.69	0.633	1.536	0.077	0.19
hsa04151	PI3K-Akt signaling pathway	0.445	1.343	0.001	0.23	0.423	1.471	0.017	0.23
hsa00980	Metabolism of xenobiotics by cytochrome P450	0.661	1.882	0	0.0029	0.85	2.259	0	0
hsa00983	Drug metabolism - other enzymes	0.606	1.681	0.001	0.026	0.858	2.092	0	0.00074
hsa00982	Drug metabolism - cytochrome P450	0.696	1.951	0	0.00074	0.881	2.302	0	0
hsa05221	Acute myeloid leukemia	0.387	1.081	0.34	0.7	0.346	0.96	0.5	0.63
hsa00190	Oxidative phosphorylation	0.173	0.506	1	1	-0.182	-0.683	0.99	1
hsa00590	Arachidonic acid metabolism	0.567	1.587	0.003	0.059	0.77	1.902	0	0.016
hsa04710	Circadian rhythm	0.435	1.166	0.24	0.51	-0.414	-1.209	0.2	0.44
hsa00052	Galactose metabolism	0.47	1.245	0.15	0.36	0.682	1.667	0.041	0.1
hsa00051	Fructose and mannose metabolism	0.563	1.523	0.026	0.087	0.557	1.437	0.13	0.27
hsa05152	Tuberculosis	0.338	1.003	0.49	0.88	0.43	1.376	0.066	0.31
hsa05014	Amyotrophic lateral sclerosis (ALS)	0.213	0.586	0.99	1	0.202	0.539	0.98	1
hsa05016	Huntington's disease	0.188	0.554	1	1	-0.165	-0.659	1	1
hsa05010	Alzheimer's disease	0.176	0.514	1	1	0.241	0.79	0.83	0.84
hsa05012	Parkinson's disease	0.157	0.457	1	1	-0.202	-0.777	0.92	0.98
hsa04724	Glutamatergic synapse	0.188	0.552	1	1	0.341	0.992	0.46	0.6
hsa04550	Signaling pathways regulating pluripotency of stem cells	0.277	0.815	0.91	1	0.326	1.015	0.44	0.59
hsa03040	Spliceosome	0.35	1.025	0.39	0.85	-0.565	-2.238	0	0.00013
hsa04022	cGMP-PKG signaling pathway	0.24	0.714	0.99	1	0.35	1.121	0.28	0.51
hsa04650	Natural killer cell mediated cytotoxicity	0.261	0.762	0.95	1	0.472	1.384	0.082	0.3
hsa04020	Calcium signaling pathway	0.278	0.821	0.91	1	0.559	1.718	0.0077	0.078
hsa03320	PPAR signaling pathway	0.681	1.93	0	0.0013	0.758	2.116	0	0.00057
hsa04024	cAMP signaling pathway	0.318	0.946	0.66	0.99	0.311	0.99	0.48	0.6
hsa04141	Protein processing in endoplasmic reticulum	0.333	0.982	0.54	0.92	0.193	0.638	0.98	0.96
hsa04140	Regulation of autophagy	0.135	0.372	1	1	0.348	0.869	0.57	0.74
hsa00280	Valine, leucine and isoleucine degradation	0.52	1.44	0.032	0.14	0.533	1.511	0.065	0.2
hsa04142	Lysosome	0.39	1.13	0.18	0.59	0.493	1.572	0.019	0.16
hsa04145	Phagosome	0.398	1.173	0.11	0.51	0.489	1.518	0.029	0.19
hsa04150	mTOR signaling pathway	0.299	0.833	0.8	1	0.361	1.018	0.43	0.59
hsa04380	Osteoclast differentiation	0.326	0.956	0.59	0.97	0.487	1.53	0.02	0.19
hsa05410	Hypertrophic cardiomyopathy (HCM)	0.44	1.258	0.08	0.34	0.447	1.279	0.18	0.37
hsa05412	Arrhythmogenic right ventricular cardiomyopathy (ARVC)	0.452	1.26	0.081	0.35	0.337	0.941	0.53	0.65
hsa05414	Dilated cardiomyopathy	0.411	1.181	0.14	0.51	0.458	1.274	0.18	0.37
hsa05416	Viral myocarditis	0.445	1.247	0.14	0.36	0.594	1.589	0.032	0.15
hsa00520	Amino sugar and nucleotide sugar metabolism	0.326	0.894	0.67	1	-0.246	-0.795	0.8	0.97
hsa02010	ABC transporters	0.447	1.241	0.14	0.36	0.643	1.641	0.048	0.11
hsa04810	Regulation of actin cytoskeleton	0.324	0.965	0.61	0.95	0.263	0.87	0.67	0.74
hsa00670	One carbon pool by folate	0.468	1.162	0.26	0.52	-0.612	-1.608	0.03	0.067
hsa00062	Fatty acid elongation	0.287	0.737	0.86	1	0.305	0.717	0.78	0.91
hsa00100	Steroid biosynthesis	0.428	1.097	0.35	0.66	-0.328	-0.831	0.69	0.93
hsa04330	Notch signaling pathway	0.361	0.984	0.5	0.92	0.404	1.092	0.35	0.55
hsa00450	Selenocompound metabolism	0.396	0.979	0.5	0.92	0.277	0.649	0.87	0.96
hsa00260	Glycine, serine and threonine metabolism	0.642	1.748	0.002	0.012	0.569	1.435	0.12	0.27
hsa03060	Protein export	0.394	1.008	0.46	0.88	-0.336	-0.924	0.55	0.9
hsa01212	Fatty acid metabolism	0.341	0.938	0.6	0.97	-0.339	-1.07	0.35	0.57
hsa01210	2-Oxocarboxylic acid metabolism	0.394	0.987	0.49	0.91	-0.351	-0.907	0.58	0.92
hsa05120	Epithelial cell signaling in Helicobacter pylori infection	0.416	1.167	0.18	0.52	0.285	0.826	0.67	0.79
hsa04530	Tight junction	0.274	0.798	0.93	1	0.29	0.88	0.65	0.73
hsa00860	Porphyrin and chlorophyll metabolism	0.531	1.454	0.04	0.13	0.671	1.635	0.042	0.11
hsa04540	Gap junction	0.261	0.745	0.93	1	0.434	1.252	0.19	0.39
hsa03022	Basal transcription factors	0.207	0.57	0.98	1	-0.163	-0.516	0.99	0.99
hsa05322	Systemic lupus erythematosus	0.764	2.216	0	0	-0.677	-2.521	0	0
hsa00900	Terpenoid backbone biosynthesis	0.604	1.535	0.029	0.082	0.631	1.528	0.09	0.19
hsa05321	Inflammatory bowel disease (IBD)	0.352	0.996	0.49	0.89	0.333	0.86	0.62	0.75
hsa04620	Toll-like receptor signaling pathway	0.328	0.946	0.61	0.98	0.453	1.31	0.13	0.35
hsa04621	NOD-like receptor signaling pathway	0.326	0.903	0.66	1	-0.359	-1.172	0.2	0.45
hsa04622	RIG-I-like receptor signaling pathway	0.283	0.791	0.87	1	0.389	1.088	0.35	0.55
hsa04623	Cytosolic DNA-sensing pathway	0.26	0.734	0.91	1	0.28	0.756	0.78	0.87
hsa00512	Mucin type O-Glycan biosynthesis	0.231	0.616	0.94	1	-0.326	-0.865	0.66	0.95
hsa03015	mRNA surveillance pathway	0.233	0.668	0.98	1	-0.442	-1.595	0.0087	0.062
hsa00510	N-Glycan biosynthesis	0.207	0.57	0.98	1	0.427	1.176	0.27	0.46
hsa00511	Other glycan degradation	0.281	0.689	0.87	1	0.503	1.162	0.27	0.47
hsa04130	SNARE interactions in vesicular transport	0.207	0.547	0.98	1	-0.283	-0.872	0.65	0.96
hsa00020	Citrate cycle (TCA cycle)	0.377	1.009	0.46	0.88	0.611	1.558	0.063	0.17
hsa00514	Other types of O-glycan biosynthesis	-0.207	-0.804	1	0.85	0.438	1.087	0.33	0.54
hsa03420	Nucleotide excision repair	0.47	1.286	0.11	0.3	-0.481	-1.598	0.02	0.066
hsa05230	Central carbon metabolism in cancer	0.416	1.175	0.18	0.51	0.419	1.184	0.26	0.45
hsa00350	Tyrosine metabolism	0.735	1.983	0	0.00083	0.853	2.125	0	0.00043
hsa04730	Long-term depression	0.305	0.856	0.77	1	0.488	1.319	0.17	0.35
hsa00500	Starch and sucrose metabolism	0.484	1.349	0.054	0.23	0.73	1.782	0.0074	0.049
hsa00760	Nicotinate and nicotinamide metabolism	0.384	1.016	0.45	0.87	0.566	1.369	0.17	0.31
hsa04120	Ubiquitin mediated proteolysis	0.305	0.897	0.75	1	0.197	0.641	0.98	0.96
hsa00071	Fatty acid degradation	0.516	1.406	0.043	0.17	0.675	1.856	0.0051	0.024
hsa05032	Morphine addiction	0.269	0.776	0.92	1	-0.255	-0.841	0.73	0.96
hsa01200	Carbon metabolism	0.453	1.304	0.031	0.28	-0.302	-1.131	0.21	0.53
hsa05030	Cocaine addiction	0.351	0.962	0.55	0.95	0.373	0.95	0.49	0.64
hsa05031	Amphetamine addiction	0.309	0.871	0.71	1	0.392	1.048	0.36	0.56
hsa04320	Dorso-ventral axis formation	0.453	1.18	0.24	0.51	0.493	1.215	0.26	0.43
hsa05034	Alcoholism	0.636	1.896	0	0.0022	-0.72	-2.81	0	0
hsa04940	Type I diabetes mellitus	0.317	0.865	0.69	1	-0.353	-0.944	0.53	0.87
hsa00270	Cysteine and methionine metabolism	0.688	1.863	0	0.003	0.752	1.929	0.0035	0.012
hsa05133	Pertussis	0.568	1.606	0.002	0.053	0.667	1.869	0.0017	0.021
hsa05132	Salmonella infection	0.293	0.833	0.81	1	0.302	0.887	0.59	0.72
hsa05131	Shigellosis	0.27	0.755	0.89	1	-0.211	-0.727	0.92	1
hsa05130	Pathogenic Escherichia coli infection	0.29	0.802	0.83	1	0.209	0.567	0.97	1
hsa05134	Legionellosis	0.475	1.318	0.072	0.27	0.369	1.019	0.44	0.59
hsa03410	Base excision repair	0.434	1.178	0.22	0.51	-0.602	-1.796	0	0.016
hsa00970	Aminoacyl-tRNA biosynthesis	0.266	0.731	0.89	1	-0.277	-0.9	0.63	0.92
hsa03013	RNA transport	0.267	0.783	0.95	1	-0.315	-1.229	0.093	0.41
hsa04630	Jak-STAT signaling pathway	0.261	0.773	0.96	1	0.451	1.372	0.1	0.31
hsa04721	Synaptic vesicle cycle	0.305	0.852	0.77	1	0.333	0.914	0.55	0.68
hsa04720	Long-term potentiation	0.209	0.589	0.98	1	0.314	0.867	0.6	0.74
hsa04723	Retrograde endocannabinoid signaling	0.295	0.862	0.8	1	0.439	1.224	0.23	0.41
hsa04722	Neurotrophin signaling pathway	0.274	0.807	0.92	1	0.327	1.02	0.45	0.6
hsa04725	Cholinergic synapse	0.28	0.807	0.88	1	0.443	1.263	0.17	0.38
hsa05231	Choline metabolism in cancer	0.308	0.893	0.74	1	0.476	1.428	0.063	0.27
hsa04727	GABAergic synapse	0.172	0.494	1	1	0.26	0.706	0.82	0.92
hsa04726	Serotonergic synapse	0.408	1.185	0.12	0.5	0.652	1.82	0.0048	0.034
hsa04728	Dopaminergic synapse	0.255	0.75	0.96	1	0.332	1.01	0.43	0.59
hsa05150	Staphylococcus aureus infection	0.747	2.064	0	0.00025	0.79	1.978	0	0.0067
