# Supplementary material for: Overexpression of miR-10a-5p facilitates the progression of osteoarthritis
Source: Aging (Albany NY). 2020 Apr 13;12(7):5948–76. doi: 10.18632/aging.102989 (PMC7185093; doi:10.18632/aging.102989)
Supplement: Supplementary Table 20 [file aging-12-102989-s002..xlsx]

## Sheet: 111
Table S20: The network degreee analysis of all the differentially-expressed mRNAs using CytoHubba.
node_name	MCC	DMNC	MNC	Degree	EPC	BottleNeck	EcCentricity	Closeness	Radiality	Betweenness	Stress	ClusteringCoefficient
ALB	92200000000000	0.39368	112	114	37.136	132	0.16301	221.35	9.86874	29597.4	205144	0.18615
APOB	92200000000000	0.61718	69	69	33.502	11	0.16301	189.8	9.5885	6560.2	57670	0.35166
APOA1	92200000000000	0.71489	67	67	34.538	4	0.16301	185.667	9.52256	2353.34	28734	0.41113
FGA	92200000000000	0.73878	64	67	33.985	17	0.16301	187.467	9.55553	6482.96	62998	0.39303
AHSG	92200000000000	0.71922	64	67	33.272	42	0.16301	185.967	9.52256	9478.01	64914	0.38263
KNG1	92200000000000	0.68111	63	63	32.615	17	0.16301	187.717	9.5885	5775.17	57566	0.39939
FGG	92200000000000	0.81022	60	60	33.94	13	0.16301	181.717	9.49509	2305.65	31832	0.48249
APOE	92200000000000	0.69703	59	59	32.875	4	0.16301	182.917	9.51157	2467.27	29854	0.4173
SERPINC1	92200000000000	0.8095	57	58	32.65	8	0.16301	176.533	9.40717	1816.5	22920	0.47308
HP	92200000000000	0.69771	57	57	30.977	8	0.16301	176.5	9.40992	2306.26	26120	0.42231
CLU	92200000000000	0.70398	55	56	31.105	2	0.16301	179.1	9.47861	3355.98	32392	0.41558
PLG	92200000000000	0.79741	52	52	32.557	4	0.16301	179.383	9.50883	1899.47	28236	0.49698
SERPINA1	92200000000000	0.91115	52	52	32.997	3	0.16301	173.633	9.39344	549.57	9214	0.56787
ORM1	92200000000000	0.7829	51	51	31.026	1	0.16301	174.217	9.40992	1102.42	14502	0.49098
APOH	92200000000000	0.92612	48	49	30.282	2	0.16301	173.833	9.40717	1310.9	14248	0.56803
FGB	92200000000000	0.85403	48	48	30.377	1	0.16301	174.967	9.45113	1477	24136	0.5461
HRG	92200000000000	0.88083	47	48	30.004	2	0.16301	172.55	9.40443	1274.3	16086	0.54344
CP	92200000000000	0.98666	46	48	31.493	2	0.16301	171.167	9.3742	1487.59	13894	0.58688
APOA2	92200000000000	0.97136	47	47	29.66	4	0.16301	171.167	9.36871	477.875	7680	0.62535
C4A	92200000000000	0.85849	46	46	30.685	2	0.16301	168.5	9.33024	1357.93	17594	0.55652
APOC3	92200000000000	0.81691	45	45	29.328	1	0.16301	169.2	9.35222	583.297	9232	0.53333
TTR	92200000000000	0.90819	44	45	28.499	1	0.16301	170	9.36596	1075.25	11848	0.57071
ITIH2	92200000000000	0.99793	45	45	31.14	1	0.16301	170.95	9.37695	356.973	6974	0.65152
TF	92200000000000	1.07054	44	45	29.962	3	0.16301	168.75	9.34123	1542.63	11974	0.67273
GC	92200000000000	0.96285	44	44	30.175	1	0.16301	169.333	9.36321	681.384	11116	0.63319
A2M	92200000000000	0.9377	42	43	28.311	5	0.16301	170.55	9.39618	2964.49	28660	0.5969
VTN	92200000000000	0.78298	41	43	27.594	3	0.16301	169.333	9.37695	2904.4	28104	0.47841
AMBP	92200000000000	0.88899	42	42	28.804	4	0.16301	168.95	9.36047	1047.09	12652	0.5935
HPX	92200000000000	0.9606	41	42	27.397	2	0.16301	167	9.33024	794.528	10032	0.61556
AGT	92200000000000	0.69236	41	41	26.516	2	0.16301	171.083	9.42091	1823.58	24988	0.46585
IGFBP3	92200000000000	0.75099	37	38	26.451	2	0.16301	170.633	9.42915	1860	19058	0.49502
SERPINF2	92200000000000	0.91341	36	37	26.657	2	0.16301	165.217	9.34123	1326.1	16974	0.60661
SERPIND1	92200000000000	1.10527	35	36	28.093	1	0.16301	163.033	9.29453	449.442	4040	0.73968
F5	92200000000000	1.02646	36	36	27.797	1	0.16301	163.217	9.30552	231.23	3880	0.72063
ITIH3	92200000000000	0.83428	36	36	24.923	3	0.16301	163.483	9.29728	531.383	7642	0.58571
IGFBP1	92200000000000	0.89655	35	35	26.542	1	0.16301	164.533	9.322	387.978	5544	0.63529
FOS	2950	0.30319	31	35	13.804	11	0.13973	167.726	9.38245	6333.97	56582	0.17647
PTGS2	6039	0.31765	32	35	16.067	16	0.13973	169.926	9.41541	5477.55	49446	0.19328
PENK	92200000000000	0.85194	33	34	23.936	2	0.16301	164.367	9.33024	1550.75	17680	0.57932
APOL1	92200000000000	0.99349	33	33	25.751	1	0.16301	160.75	9.2698	107.971	2144	0.7178
RBP4	92200000000000	0.93873	31	32	25.493	3	0.16301	160.95	9.2753	492.915	5392	0.64919
ITGB2	2278	0.21489	28	32	13.04	15	0.13973	162.226	9.29728	7863.33	62684	0.125
SAA1	2640000000	0.62424	32	32	21.276	2	0.13973	159.426	9.23958	842.336	10904	0.45565
ITIH4	92200000000000	0.8314	32	32	24.103	1	0.16301	163.95	9.33299	535.21	8930	0.60685
CCND1	3052	0.27695	31	31	9.745	3	0.13973	164.593	9.34398	4623.73	36530	0.2043
LPL	604000000	0.53943	30	31	18.43	3	0.13973	159.093	9.24782	1074.86	12710	0.37634
CCL5	373749	0.35918	29	30	14.087	9	0.13973	162.426	9.31651	3701.66	35154	0.25287
UGT2B10	958000000	0.40072	30	30	17.733	2	0.16301	157.983	9.23408	3857.28	42338	0.29885
STAT1	370215	0.33184	27	28	9.102	17	0.13973	161.26	9.30827	4986.69	33780	0.2381
C4B	29000000000	0.67934	28	28	21.896	4	0.13973	155.226	9.19287	695.321	10314	0.51852
BDNF	2190	0.34991	22	26	14.768	16	0.13973	163.226	9.36596	5004.26	34108	0.20615
MFGE8	92200000000000	1.08899	26	26	21.893	1	0.16301	156.083	9.22859	40.6945	614	0.85231
PLAU	364914	0.37837	24	24	15.309	3	0.13973	160.576	9.33574	2087.21	22050	0.30435
PAH	87300000000	0.71621	24	24	17.961	2	0.16301	154.517	9.20386	547.732	7792	0.57609
C9	1720000000	0.75675	24	24	19.295	1	0.13973	146.476	9.02528	169.994	2298	0.6087
FAM20A	92200000000000	1.22513	23	24	21.745	2	0.16301	154.283	9.20386	710	4974	0.91667
CFD	1310000000000	0.72071	24	24	19.265	1	0.16301	155.717	9.24507	417.359	4816	0.57971
C6	140000000	0.73422	24	24	18.689	1	0.16301	146.6	9.02528	239.768	3118	0.59058
CHRDL1	92200000000000	1.22513	23	24	21.948	2	0.16301	154.283	9.20386	499.092	3942	0.91667
SLC2A2	7623852	0.5797	22	24	16.868	3	0.13973	154.41	9.20386	2399.27	21312	0.40217
TGFB2	1310000000000	0.66326	22	23	17.565	6	0.16301	159.517	9.33299	2646.62	20702	0.50198
MMP3	1417	0.37305	21	22	12.176	4	0.13973	159.176	9.31101	1691.75	14274	0.28571
LYZ	447026	0.59569	20	22	14.827	1	0.13973	151.726	9.17089	1089.66	10336	0.41991
LTF	1494602	0.57088	21	21	15.937	1	0.16301	151.817	9.17914	223.314	2804	0.48095
GIG25	293000000000	0.94574	20	21	18.972	2	0.16301	151.917	9.18738	737.652	5150	0.73333
SOX9	99	0.2088	20	21	6.101	2	0.13973	155.126	9.22859	2636.25	15954	0.1619
CDKN1A	1730	0.33162	20	20	7.166	13	0.13973	156.493	9.26431	1816.77	15808	0.28421
HBB	3677642	0.58955	20	20	14.07	1	0.13973	149.01	9.12144	134.961	1652	0.50526
LRP1	3674544	0.62026	20	20	16.55	1	0.13973	152.726	9.20936	189.181	3084	0.53158
CYP3A4	1049	0.38858	17	20	8.807	7	0.13973	150.993	9.15441	2632.58	19910	0.25263
CXCL16	851791	0.62986	19	20	14.953	2	0.13973	150.626	9.15166	1025	9686	0.49474
TAT	4072596	0.52265	19	19	14.54	2	0.13973	149.743	9.14342	545.564	6628	0.45614
CDKN2A	2389	0.36729	18	19	7.103	8	0.13973	155.126	9.25057	3029.63	18294	0.2924
ALDH1A1	684	0.3481	17	19	5.564	4	0.13973	148.56	9.11595	1958.31	15286	0.25146
AZGP1	187000000000	0.95495	18	19	19.578	2	0.16301	148.3	9.12144	726.553	7498	0.76023
CYP2E1	820	0.35994	18	18	6.34	10	0.13973	146.726	9.08298	933.594	10070	0.32026
PTX3	43440	0.49217	18	18	12.253	1	0.13973	148.776	9.12968	349.927	4178	0.43791
ANGPTL3	90700000	0.86152	16	17	15.457	3	0.16301	143.717	9.03078	1442.22	15336	0.70588
PCK1	3356	0.44525	17	17	10.896	3	0.13973	145.693	9.07748	407.939	5684	0.40441
A1CF	7257699	0.65097	15	16	14.01	4	0.16301	138.667	8.92088	1586.12	19876	0.54167
HABP2	91100000	0.92137	15	16	16.223	2	0.16301	146.95	9.11869	456.933	5196	0.76667
SORL1	479000000	0.72691	16	16	14.105	1	0.13973	143.41	9.04177	275.917	2548	0.675
TIMP3	290	0.34102	16	16	11.758	1	0.13973	145.343	9.08847	804.384	8324	0.31667
CCR1	362928	0.48071	15	15	7.726	1	0.13973	138.793	8.92637	367.71	3136	0.45714
TGFBR2	53	0.24879	12	15	5.319	6	0.13973	146.643	9.11869	3313.92	19356	0.1619
HMGCS2	1883	0.46171	14	15	10.699	2	0.16301	146.217	9.11045	1024.44	9088	0.39048
THY1	79	0.25901	14	15	7.083	3	0.13973	152.126	9.23134	1732.52	10720	0.21905
FABP4	146	0.33783	14	14	8.827	1	0.13973	148.21	9.15716	342.039	3442	0.32967
CYP2C9	1008	0.48423	14	14	8.091	1	0.13973	145.26	9.07748	391.905	5744	0.47253
CD36	74	0.30733	12	14	7.653	1	0.13973	148.176	9.15441	1112.88	11692	0.23077
SLPI	41176	0.49549	14	14	9.026	2	0.13973	146.026	9.09397	220.162	2254	0.48352
IRF4	362885	0.85919	9	14	2.933	1	0.12226	124.168	8.61042	374.25	1950	0.3956
JUP	40329	0.46832	12	13	6.983	2	0.13973	135.21	8.88241	355.872	2538	0.41026
CEBPA	106	0.31933	13	13	7.691	2	0.13973	149.793	9.18738	387.714	3442	0.32051
HIST1H4A	391	0.43905	12	13	5.039	7	0.13973	148.076	9.15716	2621.27	15772	0.38462
HIST1H2BH	304	0.35765	13	13	2.964	2	0.12226	125.018	8.63515	892.909	9994	0.35897
ALDOB	1112	0.54298	11	13	9.222	2	0.13973	138.476	8.94286	983.551	9544	0.41026
G6PC	2301	0.51222	12	13	8.786	1	0.13973	143.46	9.06924	560.891	6096	0.44872
SAA2	479000000	0.94521	13	13	13.403	1	0.13973	138.176	8.94011	0.66851	14	0.94872
DPP4	132	0.34487	13	13	8.942	2	0.13973	148.126	9.15166	314.149	3278	0.34615
ISG15	367932	0.67321	12	12	3.157	1	0.12226	123.935	8.61592	140.854	966	0.69697
IRF7	367922	0.83801	10	12	2.956	2	0.12226	121.368	8.56097	439.046	3034	0.63636
HIST1H2BL	184	0.35124	12	12	2.831	1	0.12226	124.518	8.6324	790.458	9492	0.36364
CHI3L1	40329	0.54298	11	12	7.821	1	0.13973	134.76	8.87143	133.57	1158	0.48485
ADAMTS5	42	0.33284	6	12	3.15	5	0.12226	128.985	8.75054	1666.48	10492	0.19697
PI3	762	0.36587	12	12	6.16	2	0.13973	150.193	9.20386	772.264	5270	0.37879
APOD	725886	0.73175	12	12	12.527	1	0.13973	137.043	8.92637	16.7046	244	0.75758
HBA1	7324	0.66175	11	11	10.734	2	0.13973	143.976	9.09671	33.7704	630	0.70909
OAS2	367921	0.83801	10	11	2.718	1	0.12226	120.618	8.54448	199.702	846	0.76364
BIRC5	5766	0.75809	8	11	2.677	6	0.12226	121.018	8.56371	1525.89	14246	0.52727
FPR1	362883	0.73825	10	11	6.67	1	0.13973	131.276	8.79724	138.318	1054	0.67273
HBEGF	247	0.46652	8	11	5.564	1	0.13973	148.326	9.17914	386.185	4214	0.30909
PIK3R3	133	0.31924	10	11	5.853	2	0.13973	136.143	8.92637	1100.06	9132	0.29091
BMP6	26	0.26253	9	11	4.842	2	0.16301	139.8	9.00055	1242.77	7878	0.2
S100A9	155	0.54881	7	11	7.274	1	0.13973	144.443	9.09671	246.366	2786	0.30909
MX1	367920	0.83801	10	10	2.777	1	0.12226	118.551	8.50327	13.0434	164	0.93333
IFIT1	367920	0.83801	10	10	3.034	1	0.12226	118.551	8.50327	13.0434	164	0.93333
OAS1	367920	0.83801	10	10	2.419	1	0.12226	118.551	8.50327	13.0434	164	0.93333
CENPU	5043	0.76834	7	10	2.475	2	0.12226	121.385	8.5747	1133.07	11784	0.48889
C4BPA	4800	0.7582	10	10	10.924	1	0.13973	131.476	8.80274	1.66558	58	0.84444
PTGDS	39	0.2864	9	10	7.558	2	0.13973	143.226	9.07748	507.167	5042	0.26667
CYP2C8	368	0.58315	8	10	4.274	1	0.13973	130.526	8.7945	307.755	2286	0.44444
SEPP1	269	0.45346	9	10	8.313	2	0.16301	140.833	9.03078	1256.78	10936	0.42222
GPSM3	362881	0.85919	9	10	7.207	3	0.13973	129.776	8.77527	1416	15036	0.8
PRKG1	12	0.2842	4	10	4.404	8	0.13973	142.693	9.06649	3765.41	18040	0.08889
ITGA9	16	0.28529	6	10	3.835	4	0.13973	129.06	8.76702	1264.69	7824	0.13333
DLK1	39	0.40246	7	10	7.306	6	0.16301	142.883	9.07748	1889.84	13272	0.24444
CD38	55	0.38186	9	10	6.392	1	0.13973	144.826	9.11045	367.785	2908	0.35556
COMP	20	0.33284	6	10	2.78	2	0.13973	127.61	8.75329	419.682	2548	0.17778
TNFRSF11B	44	0.29929	10	10	6.678	5	0.16301	147.65	9.17914	419.869	4294	0.33333
CCND2	57	0.52304	6	9	4.034	1	0.13973	138.443	9.00055	312.088	3692	0.30556
KIF2C	5761	0.75809	8	9	1.732	2	0.12226	103.068	8.02797	206.526	1098	0.72222
NDC80	5761	0.75809	8	9	2.067	4	0.12226	113.485	8.37964	629.445	5408	0.72222
HBA2	5762	0.64439	9	9	8.509	1	0.13973	141.343	9.05276	25.0228	464	0.75
IFI6	362880	0.85919	9	9	2.158	1	0.12226	114.601	8.42085	0	0	1
NEK2	5761	0.75809	8	9	1.945	3	0.12226	112.018	8.32744	359.361	3220	0.72222
IFI27	362880	0.85919	9	9	2.465	1	0.12226	114.601	8.42085	0	0	1
MAT1A	844	0.5012	9	9	9.226	1	0.13973	140.91	9.03627	187.576	2644	0.58333
CXCL6	362880	0.85919	9	9	6.794	1	0.13973	129.11	8.76977	0	0	1
CES1	175	0.55399	8	9	5.962	2	0.13973	141.943	9.05825	732.18	3330	0.52778
DKK1	14	0.32413	5	9	4.115	4	0.13973	135.943	8.92363	2256.56	13112	0.16667
PLCG2	17	0.23326	8	9	2.502	4	0.12226	119.368	8.53349	729.74	6248	0.22222
ADAM8	32	0.32929	7	9	4.424	3	0.13973	132.426	8.85494	340.748	2750	0.25
EDNRB	149	0.43736	8	9	6.186	2	0.13973	140.026	9.02528	760.401	5558	0.41667
CYP2A6	386	0.52506	9	9	3.508	1	0.13973	117.193	8.46481	42.6198	340	0.61111
C7	112	0.4296	9	9	8.142	1	0.13973	128.91	8.76702	12.9262	174	0.5
MAFB	40	0.40246	7	9	3.611	3	0.12226	130.101	8.79175	684.673	4860	0.30556
MAOB	9	0.30779	2	9	2.352	3	0.12226	119.851	8.55822	989.159	6852	0.05556
QPCT	41040	0.78759	9	9	6.432	1	0.13973	127.36	8.72581	2.01236	26	0.91667
TGM2	85	0.46652	8	9	7.512	1	0.13973	142.076	9.06924	224.618	2070	0.44444
CKAP2L	5761	0.75809	8	9	1.716	1	0.10868	100.405	7.90708	129.483	584	0.72222
HPD	75	0.47564	7	8	8.031	1	0.16301	141.767	9.07748	258.46	2802	0.46429
KIF15	5760	0.75809	8	8	1.836	1	0.10868	98.9052	7.87136	5.37914	92	0.92857
CDKN2B	62	0.4082	8	8	2.914	1	0.12226	123.735	8.67911	76.2746	528	0.5
PLIN1	39	0.40246	7	8	4.51	1	0.13973	131.51	8.85219	134.308	1428	0.39286
SCN8A	13	0.21953	7	8	1.745	3	0.12226	102.111	8.01972	777.393	5668	0.21429
CHL1	16	0.47366	4	8	3.722	6	0.13973	140.476	9.03902	3268.86	13604	0.17857
HSD11B1	28	0.56839	4	8	3.376	1	0.13973	121.01	8.58569	156.033	1360	0.25
ENTPD3	8	0.30779	2	8	3.827	4	0.13973	122.41	8.59668	2132.78	20202	0.07143
ITIH1	5041	0.76834	7	8	8.749	2	0.16301	129.067	8.76428	446.249	6352	0.75
HHEX	13	0.32413	5	8	4.001	2	0.13973	141.843	9.07199	986.992	6110	0.17857
SKA1	5040	0.76834	7	7	1.52	1	0.10868	98.4052	7.86862	0	0	1
AKR1C3	14	0.25611	7	7	2.943	2	0.13973	124.793	8.69559	129.097	938	0.33333
FMO3	241	0.66569	6	7	3.001	1	0.13973	114.986	8.42634	59.0409	384	0.66667
CYP26B1	242	0.54881	7	7	2.894	1	0.13973	121.502	8.60767	40.9416	398	0.71429
VAV3	13	0.28529	6	7	3.908	3	0.13973	131.293	8.83296	524.139	3226	0.28571
GNA14	145	0.61814	6	7	4.29	1	0.13973	126.81	8.7423	61.4195	468	0.61905
CD24	60	0.51223	7	7	4.05	1	0.13973	141.726	9.06649	32.2342	378	0.66667
FGL2	145	0.61814	6	7	7.352	3	0.13973	130.21	8.80549	1346.85	18416	0.61905
KCNA1	10	0.25931	5	7	1.367	2	0.12226	99.4441	7.93455	553.408	3604	0.19048
CACNA1G	8	0.30898	3	7	2.404	5	0.13973	125.543	8.72856	2155.18	13772	0.14286
KYNU	122	0.64826	5	7	5.222	2	0.13973	124.61	8.67911	833.836	6934	0.47619
KLF2	8	0.30898	3	7	3.088	1	0.12226	127.535	8.76153	180.452	1160	0.09524
DSG2	7	0.30898	3	6	2.835	1	0.12226	116.151	8.50877	142.872	750	0.2
SERPINE2	15	0.38896	5	6	5.472	2	0.13973	124.843	8.70383	86.7022	910	0.4
HIST1H2AM	240	0.66569	6	6	1.564	1	0.12226	106.535	8.22853	0.4	2	0.93333
HIST2H3D	240	0.66569	6	6	2.052	1	0.12226	106.535	8.22853	0.4	2	0.93333
ADH1C	27	0.45378	5	6	2.467	1	0.13973	115.81	8.46481	52.6917	508	0.46667
BTG2	20	0.38039	6	6	3.004	1	0.12226	118.535	8.54998	51.1233	370	0.53333
ANK1	7	0.30898	3	6	1.593	4	0.12226	109.394	8.3082	642.401	3518	0.13333
PRLR	8	0.2842	4	6	3.342	1	0.13973	126.31	8.73955	120.877	888	0.2
H2AFY2	240	0.66569	6	6	1.54	1	0.12226	106.535	8.22853	0.4	2	0.93333
SPON1	26	0.56839	4	6	1.571	4	0.13973	107.46	8.27523	774.545	3860	0.4
SPON2	26	0.56839	4	6	2.798	2	0.13973	123.16	8.66537	864.033	6806	0.4
LBP	26	0.56839	4	6	5.775	1	0.13973	141.91	9.08572	203.281	2734	0.46667
STAB1	15	0.38896	5	6	5.576	2	0.13973	139.576	9.04177	727.506	2364	0.4
GFRA1	9	0.46346	3	6	2.373	2	0.12226	120.068	8.61042	749.503	5530	0.26667
FAM64A	720	0.71324	6	6	1.611	1	0.10868	95.2718	7.7752	0	0	1
LCP1	7	0.30898	3	6	1.981	3	0.12226	117.918	8.51976	1261.59	9762	0.13333
SULT1C2	49	0.58344	5	6	4.404	2	0.13973	124.276	8.68735	712.5	4812	0.6
GADD45B	19	0.45378	5	6	3.157	1	0.12226	123.668	8.70383	55.5782	430	0.46667
TTN	6	0.30779	2	6	3.261	2	0.13973	127.293	8.75329	1124.26	5818	0.06667
TRPA1	9	0.46346	3	6	3.842	5	0.13973	132.51	8.8934	2045.12	13104	0.26667
PDK4	24	0.42794	6	6	3.432	1	0.13973	118.71	8.56921	11.27	98	0.6
AQP1	8	0.2842	4	6	5.597	1	0.13973	136.46	8.95934	258.86	2278	0.2
CFHR1	49	0.58344	5	6	5.46	1	0.13973	122.626	8.63515	263.21	4108	0.6
SLC40A1	6	0.30898	3	5	4.362	1	0.13973	121.66	8.6269	39.1978	286	0.2
ADH1B	26	0.45378	5	5	2.74	1	0.13973	113.152	8.40711	12.9256	226	0.7
CACNB4	9	0.37893	4	5	1.347	1	0.12226	96.7369	7.85763	107.759	380	0.4
HIST1H2BF	120	0.64826	5	5	1.507	1	0.12226	106.035	8.22578	0	0	1
SMAD6	7	0.2842	4	5	2.247	2	0.13973	115.11	8.50602	157.269	1310	0.3
ADH4	26	0.45378	5	5	2.367	1	0.13973	112.902	8.40162	12.9256	226	0.7
ADH7	26	0.45378	5	5	2.7	1	0.13973	112.902	8.40162	12.9256	226	0.7
EPOR	6	0.30898	3	5	1.929	1	0.12226	113.168	8.4181	215.74	1466	0.3
HOXA3	13	0.47366	4	5	1.381	2	0.12226	105.518	8.19831	711.519	4242	0.5
ABCA7	26	0.45378	5	5	5.733	1	0.13973	127.393	8.76977	48.8842	550	0.7
DUSP6	5	0.30779	2	5	2.217	6	0.12226	117.701	8.53899	1060.06	8288	0.1
ATP8B4	25	0.56839	4	5	2.589	1	0.12226	120.485	8.6269	1237.34	11236	0.6
VNN1	6	0.30898	3	5	2.184	2	0.12226	117.135	8.53899	98.5239	564	0.2
GPX3	7	0.2842	4	5	4.291	1	0.13973	135.376	8.94561	342.975	4160	0.3
AGMO	6	0.30898	3	5	2.51	1	0.13973	114.826	8.46481	58.2454	358	0.2
ITGA7	10	0.32413	5	5	2.723	1	0.13973	122.86	8.65713	56.0997	490	0.5
HPGD	6	0.30898	3	5	2.595	1	0.12226	120.418	8.59394	60.6941	610	0.2
MGP	14	0.38896	5	5	4.984	1	0.16301	137.133	8.99781	159.111	1274	0.6
PRG4	8	0.46346	3	5	2.122	2	0.13973	123.493	8.67911	119.402	884	0.3
BHMT	5	0.30898	3	4	2.147	1	0.13973	108.419	8.28897	12.0579	86	0.33333
LTBP3	7	0.46346	3	4	4.106	1	0.16301	128.283	8.81098	10.9929	74	0.5
ADH6	7	0.46346	3	4	2.16	1	0.13973	112.402	8.39887	12.9256	226	0.5
FBLN2	4	0	1	4	2.681	1	0.13973	121.01	8.64339	105.618	658	0
GUCY1A2	6	0.2842	4	4	1.468	2	0.12226	104.794	8.18732	146.948	1430	0.5
DUSP4	4	0.30779	2	4	2.049	2	0.12226	115.551	8.49503	671.396	5204	0.16667
ADAMTS19	24	0.56839	4	4	1.259	1	0.12226	99.4107	7.9895	0	0	1
THSD7A	24	0.56839	4	4	1.307	1	0.12226	99.4107	7.9895	0	0	1
GUCY1A3	6	0.2842	4	4	1.417	1	0.12226	104.794	8.18732	146.948	1430	0.5
FAM131B	7	0.46346	3	4	5.144	2	0.13973	120.476	8.60493	710	8438	0.5
HOXA1	7	0.46346	3	4	2.441	3	0.13973	134.993	8.94835	826.243	4900	0.5
DIO3	4	0.30779	2	4	1.901	3	0.13973	104.919	8.18457	779.212	8378	0.16667
ZFP36	8	0.37893	4	4	2.094	1	0.12226	118.468	8.56646	12.3719	130	0.66667
ENPP2	4	0.30779	2	4	3.27	2	0.13973	135.843	8.97583	762.222	4276	0.16667
TNXB	4	0.30779	2	4	3.266	1	0.13973	115.076	8.46755	20.973	208	0.33333
IL16	7	0.46346	3	4	3.029	1	0.12226	124.268	8.70933	32.3285	582	0.5
HIC1	8	0.37893	4	4	2.155	1	0.12226	113.801	8.47305	26.379	174	0.66667
TXNIP	5	0.30898	3	4	3.7	1	0.13973	124.776	8.7368	48.4085	452	0.33333
FLRT3	4	0	1	4	1.423	5	0.10868	97.3718	7.91532	1667.63	13434	0
HEPHL1	4	0.30779	2	4	3.535	1	0.13973	119.376	8.57196	13.782	196	0.16667
HAS1	4	0.30779	2	4	4.147	5	0.16301	136.7	8.99231	955.228	5134	0.16667
HHIP	4	0	1	4	2.164	3	0.13973	115.326	8.50877	1533.27	9278	0
AKR1C2	4	0.30898	3	3	1.971	1	0.13973	108.336	8.29721	0.81515	8	0.66667
CACNA2D3	4	0.30898	3	3	1.255	1	0.12226	94.5536	7.82191	7.55689	70	0.66667
FZD8	3	0.30779	2	3	1.306	1	0.12226	98.294	7.97027	101.13	604	0.33333
TEC	4	0.30898	3	3	1.261	1	0.12226	99.9274	8.02522	3.2376	34	0.66667
SPTBN4	4	0.30898	3	3	1.144	1	0.10868	86.3337	7.44002	3.66667	8	0.66667
IL12A	4	0.30898	3	3	1.729	1	0.12226	110.051	8.35766	2.29785	12	0.66667
GMPR	3	0	1	3	1.191	1	0.13973	96.0357	7.88235	116.612	518	0
DOCK8	3	0	1	3	1.549	3	0.12226	109.501	8.33293	1418	10434	0
RSPO3	3	0.30779	2	3	1.154	2	0.12226	98.044	7.96478	710	3922	0.33333
FBXO2	3	0	1	3	2.609	6	0.13973	119.31	8.5802	3438.58	17438	0
C5AR2	6	0.46346	3	3	3.399	1	0.13973	113.619	8.4236	0	0	1
NAALADL1	4	0.30898	3	3	2.711	1	0.13973	116.286	8.53349	0.33407	6	0.66667
USP2	6	0.46346	3	3	1.898	1	0.12226	115.368	8.50052	0	0	1
CACHD1	3	0	1	3	1.262	2	0.13973	103.395	8.13512	825.365	8196	0
GDA	3	0	1	3	2.925	1	0.13973	121.26	8.66262	387.617	2986	0
HSPB6	3	0	1	3	1.278	3	0.12226	104.051	8.20105	1431.31	5410	0
CAP2	3	0.30779	2	3	1.144	1	0.10868	90.6218	7.64333	48.4313	220	0.33333
ABCC6	3	0.30779	2	3	2.179	2	0.13973	118.426	8.55547	710	4154	0.33333
SCUBE3	3	0	1	3	1.411	3	0.12226	105.211	8.20105	1494.75	8212	0
VMO1	3	0.30779	2	3	4.241	1	0.13973	114.086	8.42909	1.72082	36	0.33333
PRELP	3	0	1	3	2.39	1	0.13973	116.826	8.53074	19.9244	232	0
STK32A	3	0	1	3	1.236	2	0.12226	95.7869	7.86312	144.861	726	0
CADM3	3	0	1	3	1.279	1	0.12226	107.127	8.27523	267.101	1284	0
HAS3	3	0	1	3	1.916	1	0.13973	106.102	8.256	7.69162	36	0
FAM65B	3	0	1	3	1.146	2	0.12226	100.887	8.08566	788.178	2914	0
LYVE1	3	0.30779	2	3	3.004	1	0.13973	134.393	8.9511	70.9046	726	0.33333
HSPB8	3	0.30779	2	3	1.57	1	0.12226	115.085	8.51151	369.781	1310	0.33333
BOC	3	0	1	3	1.167	2	0.12226	89.6107	7.62959	804.061	4058	0
TP53INP1	3	0.30779	2	3	1.654	1	0.12226	108.701	8.33018	6.65014	42	0.33333
IGFBP2	3	0	1	3	3.061	1	0.13973	133.843	8.94011	128.837	1548	0
IL26	2	0	1	2	2.507	1	0.13973	118.026	8.5802	4.37572	30	0
APOBEC3B	2	0.30779	2	2	2.444	1	0.13973	119.843	8.62141	0	0	1
PIK3C2B	2	0.30779	2	2	1.33	1	0.12226	98.6512	7.995	0	0	1
VNN3	2	0.30779	2	2	1.23	1	0.12226	105.668	8.27523	0	0	1
ATP6V1G2	2	0	1	2	2.105	2	0.13973	111.052	8.37139	710	4542	0
DMC1	2	0.30779	2	2	1.144	1	0.10868	90.8218	7.66256	0	0	1
ANKRD9	2	0	1	2	1.199	1	0.12226	90.5536	7.67904	37.1827	184	0
BMPER	2	0.30779	2	2	1.242	1	0.13973	99.469	8.0417	0	0	1
GDPD3	2	0	1	2	1.141	1	0.12226	98.9441	8.04995	10.3889	20	0
ACSL4	2	0	1	2	2.553	1	0.12226	118.068	8.57196	1.82383	30	0
SLC19A2	2	0	1	2	1.738	2	0.12226	105.551	8.23402	710	4742	0
BAAT	2	0	1	2	1.608	1	0.12226	98.4107	7.97851	47.6247	316	0
ST6GALNAC4	2	0	1	2	2.092	1	0.13973	118.643	8.57196	17.2335	280	0
PF4V1	2	0.30779	2	2	1.723	1	0.12226	109.385	8.35216	0	0	1
MYO1F	2	0.30779	2	2	1.391	1	0.12226	109.585	8.34667	0	0	1
KCNH1	2	0.30779	2	2	1.121	1	0.10868	80.7409	7.16253	0	0	1
NDP	2	0	1	2	1.209	1	0.10868	90.1671	7.64333	30.659	116	0
TMEM171	2	0	1	2	1.616	2	0.13973	97.9452	7.95104	710	9090	0
SLC43A2	2	0	1	2	1.091	1	0.10868	76.1647	6.93175	23.7176	120	0
SLC7A8	2	0	1	2	1.093	2	0.12226	81.3667	7.2422	88.866	1416	0
SLC7A11	2	0	1	2	1.255	1	0.12226	91.8631	7.72575	5.84127	16	0
DYSF	2	0	1	2	1.268	1	0.12226	94.1298	7.8274	39.8383	156	0
BANK1	2	0	1	2	1.22	1	0.10868	96.1456	7.86587	18.5399	78	0
GREM2	2	0	1	2	1.998	1	0.13973	110.286	8.38513	2.50182	14	0
SLC7A7	2	0	1	2	1.391	2	0.12226	94.7369	7.84664	640.886	8938	0
DLX3	2	0	1	2	1.25	1	0.12226	106.311	8.2615	8.5039	72	0
PI15	2	0	1	2	1.086	2	0.10868	81.0421	7.23121	710	3702	0
P2RX5	2	0	1	2	1.206	1	0.12226	91.5536	7.68454	40.1685	174	0
OLFML2B	2	0	1	2	1.15	2	0.09781	76.2754	6.94548	710	6178	0
CABLES1	2	0	1	2	1.906	1	0.13973	103.286	8.18182	18.4109	48	0
XG	2	0	1	2	1.324	1	0.12226	102.961	8.15984	13.8309	86	0
CXADR	2	0	1	2	1.487	1	0.12226	106.144	8.24776	30.2532	140	0
GJB2	2	0	1	2	1.254	4	0.12226	89.2369	7.62135	2118	10614	0
GCNT2	2	0	1	2	1.073	2	0.09781	60.1726	5.68716	710	3542	0
PMS2	2	0.30779	2	2	1.291	1	0.12226	111.068	8.4236	0	0	1
C2CD4A	2	0	1	2	1.097	1	0.12226	102.901	8.17358	36.251	116	0
AJAP1	2	0	1	2	1.1	1	0.10868	90.648	7.69003	42.8343	204	0
TMEM232	2	0	1	2	1.42	2	0.12226	93.8464	7.80543	710	7520	0
GJA3	2	0	1	2	1.073	3	0.10868	71.8409	6.657	1416	7080	0
NFKBIZ	2	0	1	2	1.621	1	0.12226	113.168	8.45656	212.266	1898	0
KCNS2	2	0	1	2	1.118	1	0.10868	89.8004	7.62959	46.3805	174	0
NAPEPLD	2	0	1	2	1.495	1	0.12226	112.835	8.45656	130.571	570	0
AKAP6	2	0	1	2	1.092	2	0.10868	80.5528	7.23121	710	2668	0
HMCN1	2	0	1	2	1.783	1	0.13973	96.9381	7.92082	2.03846	4	0
ICAM2	1	0	1	1	1.419	1	0.12226	108.168	8.32194	0	0	0
ST8SIA1	1	0	1	1	1.04	1	0.00548	1	0.01644	0	0	0
ST3GAL5	1	0	1	1	1.04	1	0.00548	1	0.01644	0	0	0
CLK1	1	0	1	1	1.042	1	0.00548	1	0.01644	0	0	0
CLK4	1	0	1	1	1.042	1	0.00548	1	0.01644	0	0	0
HMGCLL1	1	0	1	1	1.427	1	0.13973	101.476	8.13512	0	0	0
KANK1	1	0	1	1	1.044	1	0.10868	82.8504	7.3576	0	0	0
SLC19A3	1	0	1	1	1.078	1	0.10868	80.7456	7.25869	0	0	0
AK5	1	0	1	1	1.063	1	0.12226	89.2702	7.62135	0	0	0
SULT1C4	1	0	1	1	1.115	1	0.12226	90.6464	7.71201	0	0	0
FJX1	1	0	1	1	1.88	1	0.13973	104.819	8.22853	0	0	0
RGPD8	1	0	1	1	1.12	1	0.12226	81.4988	7.2999	0	0	0
CCDC152	1	0	1	1	1.445	1	0.13973	99.1119	8.05544	0	0	0
PAPPA2	1	0	1	1	2.601	1	0.13973	112.01	8.45382	0	0	0
MCOLN2	1	0	1	1	1.121	1	0.12226	95.1607	7.91807	0	0	0
CPA4	1	0	1	1	1.157	1	0.13973	100.202	8.10215	0	0	0
MPV17L	1	0	1	1	1.036	1	0.12226	87.6964	7.58014	0	0	0
RAP1GAP2	1	0	1	1	1.074	1	0.12226	100.077	8.09116	0	0	0
PPP1R3C	1	0	1	1	2.167	1	0.13973	112.619	8.43184	0	0	0
GREB1L	1	0	1	1	1.245	1	0.12226	88.7464	7.62959	0	0	0
TOX	1	0	1	1	2.007	1	0.13973	109.11	8.35491	0	0	0
RAI2	1	0	1	1	1.036	1	0.08892	51.2651	4.71183	0	0	0
OSR2	1	0	1	1	2.633	1	0.13973	117.26	8.54723	0	0	0
SEMA3E	1	0	1	1	1.651	1	0.12226	109.285	8.39063	0	0	0
IDUA	1	0	1	1	2.375	1	0.13973	113.243	8.43184	0	0	0
RNF144A	1	0	1	1	1.035	1	0.08892	62.4988	5.97015	0	0	0
PBLD	1	0	1	1	1.037	1	0.10868	77.998	7.11033	0	0	0
STEAP2	1	0	1	1	2.102	1	0.13973	111.393	8.39887	0	0	0
HLF	1	0	1	1	1.226	1	0.12226	99.7774	8.08292	0	0	0
PPM1H	1	0	1	1	1.027	1	0.10868	70.9992	6.65426	0	0	0
PRSS12	1	0	1	1	1.046	1	0.10868	82.8504	7.3576	0	0	0
CNTNAP4	1	0	1	1	1.057	1	0.12226	99.1369	8.06368	0	0	0
EHF	1	0	1	1	1.319	1	0.12226	105.701	8.27523	0	0	0
GRB14	1	0	1	1	1.036	1	0.10868	76.2111	6.98944	0	0	0
TMEM38A	1	0	1	1	1.046	1	0.12226	76.1536	6.9757	0	0	0
ENPP5	1	0	1	1	1.092	1	0.12226	79.294	7.15978	0	0	0
MEDAG	1	0	1	1	1.047	1	0.09781	65.6996	6.25588	0	0	0
ANKRD22	1	0	1	1	1.031	1	0.00548	1	0.01644	0	0	0
RNF122	1	0	1	1	1.031	1	0.00548	1	0.01644	0	0	0
BRINP2	1	0	1	1	1.052	1	0.12226	83.731	7.39606	0	0	0
HOMER2	1	0	1	1	1.784	1	0.12226	109.285	8.39063	0	0	0
FILIP1	1	0	1	1	1.047	1	0.09781	65.4456	6.25588	0	0	0
HOXA13	1	0	1	1	1.062	1	0.10868	80.398	7.22297	0	0	0
CHI3L2	1	0	1	1	1.215	1	0.12226	98.8679	8.06643	0	0	0
SPOCK1	1	0	1	1	1.59	1	0.12226	107.535	8.33568	0	0	0
SCARA5	1	0	1	1	2.003	1	0.13973	110.926	8.40162	0	0	0
GATM	1	0	1	1	1.813	1	0.13973	103.919	8.21204	0	0	0
CHRNB1	1	0	1	1	1.904	1	0.13973	118.06	8.5802	0	0	0
CLDN1	1	0	1	1	1.947	1	0.12226	103.261	8.17633	0	0	0
TNFSF15	1	0	1	1	1.044	1	0.00548	1	0.01644	0	0	0
TNFRSF21	1	0	1	1	1.044	1	0.00548	1	0.01644	0	0	0
LRRC32	1	0	1	1	1.036	1	0.10868	73.7278	6.83009	0	0	0
FMNL1	1	0	1	1	1.131	1	0.10868	87.148	7.54442	0	0	0
AGR2	1	0	1	1	1.498	1	0.13973	102.186	8.14611	0	0	0
